# Supplementary material
Source: publisher figshare collection journal article supplement (https://acs.figshare.com/ndownloader/files/10302225)
Supplement: Supplementary file 1 [file 10302225]

data_9f
_audit_creation_date              2017-05-19
_audit_creation_method
;
Olex2 1.2
(compiled 2017.03.02 svn.r3394 for OlexSys, GUI svn.r5324)
;
_shelx_SHELXL_version_number      '2014/7'
_publ_contact_author_address      ?
_publ_contact_author_email        ?
_publ_contact_author_id_orcid     ?
_publ_contact_author_name         ''
_publ_contact_author_phone        ?
_publ_section_references
;
Dolomanov, O.V., Bourhis, L.J., Gildea, R.J, Howard, J.A.K. & Puschmann, H.
 (2009), J. Appl. Cryst. 42, 339-341.

Sheldrick, G.M. (2015). Acta Cryst. A71, 3-8.

Sheldrick, G.M. (2015). Acta Cryst. C71, 3-8.
;
_chemical_name_common             ?
_chemical_name_systematic
;
 ?
;
_chemical_formula_moiety          'C28 H32 N2 O6 S2'
_chemical_formula_sum             'C28 H32 N2 O6 S2'
_chemical_formula_weight          556.67
_chemical_absolute_configuration  ?
_chemical_melting_point           ?
_chemical_oxdiff_formula          'C28 H32 N2 O6 S2'
loop_
  _atom_type_symbol
  _atom_type_description
  _atom_type_scat_dispersion_real
  _atom_type_scat_dispersion_imag
  _atom_type_scat_source
 'C' 'C' 0.0033 0.0016 'International Tables Vol C Tables 4.2.6.8 and 6.1.1.4'
 'H' 'H' 0.0000 0.0000 'International Tables Vol C Tables 4.2.6.8 and 6.1.1.4'
 'N' 'N' 0.0061 0.0033 'International Tables Vol C Tables 4.2.6.8 and 6.1.1.4'
 'O' 'O' 0.0106 0.0060 'International Tables Vol C Tables 4.2.6.8 and 6.1.1.4'
 'S' 'S' 0.1246 0.1234 'International Tables Vol C Tables 4.2.6.8 and 6.1.1.4'

_shelx_space_group_comment
;
The symmetry employed for this shelxl refinement is uniquely defined
by the following loop, which should always be used as a source of
symmetry information in preference to the above space-group names.
They are only intended as comments.
;
_space_group_crystal_system       'orthorhombic'
_space_group_IT_number            29
_space_group_name_H-M_alt         'P c a 21'
_space_group_name_Hall            'P 2c -2ac'
loop_
  _space_group_symop_operation_xyz
 'x, y, z'
 '-x, -y, z+1/2'
 '-x+1/2, y, z+1/2'
 'x+1/2, -y, z'

_cell_length_a                    13.3456(8)
_cell_length_b                    10.2748(7)
_cell_length_c                    19.6583(17)
_cell_angle_alpha                 90
_cell_angle_beta                  90
_cell_angle_gamma                 90
_cell_volume                      2695.6(3)
_cell_formula_units_Z             4
_cell_measurement_reflns_used     2204
_cell_measurement_temperature     100.00(10)
_cell_measurement_theta_max       27.3910
_cell_measurement_theta_min       2.5050
_shelx_estimated_absorpt_T_max    ?
_shelx_estimated_absorpt_T_min    ?
_exptl_absorpt_coefficient_mu     0.243
_exptl_absorpt_correction_T_max   1.00000
_exptl_absorpt_correction_T_min   0.69662
_exptl_absorpt_correction_type    multi-scan
_exptl_absorpt_process_details
;
CrysAlisPro 1.171.38.43 (Rigaku Oxford Diffraction, 2015)
Empirical absorption correction using spherical harmonics,
 implemented in SCALE3 ABSPACK scaling algorithm.
;
_exptl_absorpt_special_details    ?
_exptl_crystal_colour             'clear whiteish white'
_exptl_crystal_colour_lustre      clear
_exptl_crystal_colour_modifier    whiteish
_exptl_crystal_colour_primary     white
_exptl_crystal_density_diffrn     1.372
_exptl_crystal_density_meas       ?
_exptl_crystal_density_method     'not measured'
_exptl_crystal_description        block
_exptl_crystal_F_000              1176
_exptl_crystal_size_max           0.23
_exptl_crystal_size_mid           0.22
_exptl_crystal_size_min           0.21
_exptl_special_details
;
 ?
;
_exptl_transmission_factor_max    ?
_exptl_transmission_factor_min    ?
_diffrn_reflns_av_R_equivalents   0.0514
_diffrn_reflns_av_unetI/netI      0.0849
_diffrn_reflns_Laue_measured_fraction_full 0.999
_diffrn_reflns_Laue_measured_fraction_max 0.999
_diffrn_reflns_limit_h_max        15
_diffrn_reflns_limit_h_min        -17
_diffrn_reflns_limit_k_max        13
_diffrn_reflns_limit_k_min        -12
_diffrn_reflns_limit_l_max        15
_diffrn_reflns_limit_l_min        -25
_diffrn_reflns_number             8233
_diffrn_reflns_point_group_measured_fraction_full 0.748
_diffrn_reflns_point_group_measured_fraction_max 0.741
_diffrn_reflns_theta_full         25.242
_diffrn_reflns_theta_max          27.469
_diffrn_reflns_theta_min          2.502
_diffrn_ambient_environment       N~2~
_diffrn_ambient_temperature       100.00(10)
_diffrn_detector                  'CCD plate'
_diffrn_detector_area_resol_mean  16.0839
_diffrn_detector_type             Eos
_diffrn_measured_fraction_theta_full 0.999
_diffrn_measured_fraction_theta_max 0.999
_diffrn_measurement_details
;
List of Runs (angles in degrees, time in seconds):

  # Type    Start    End  Width  t~exp~   \w     \q     \k     \f   Frames
--------------------------------------------------------------------------
  1  \w    -38.00  11.00   1.00   20.00    --  -18.32  57.00  60.00   49
  2  \w    -15.00  90.00   1.00   20.00    --   22.54  19.00 120.00  105
;
_diffrn_measurement_device        'four-circle diffractometer'
_diffrn_measurement_device_type   'Xcalibur, Eos, Nova'
_diffrn_measurement_method        '\w scans'
_diffrn_orient_matrix_type
'CrysAlisPro convention (1999,Acta A55,543-557)'
_diffrn_orient_matrix_UB_11       -0.0137191000
_diffrn_orient_matrix_UB_12       -0.0651735000
_diffrn_orient_matrix_UB_13       -0.0073528000
_diffrn_orient_matrix_UB_21       -0.0084471000
_diffrn_orient_matrix_UB_22       -0.0112640000
_diffrn_orient_matrix_UB_23       0.0351475000
_diffrn_orient_matrix_UB_31       -0.0506383000
_diffrn_orient_matrix_UB_32       0.0195717000
_diffrn_orient_matrix_UB_33       -0.0038947000
_diffrn_radiation_monochromator   mirror
_diffrn_radiation_probe           x-ray
_diffrn_radiation_type            MoK\a
_diffrn_radiation_wavelength      0.71073
_diffrn_source                    'micro-focus sealed X-ray tube'
_diffrn_source_type               'Mova (Mo) X-ray Source'
_reflns_Friedel_coverage          0.440
_reflns_Friedel_fraction_full     0.480
_reflns_Friedel_fraction_max      0.467
_reflns_number_gt                 3521
_reflns_number_total              4583
_reflns_odcompleteness_completeness 99.77
_reflns_odcompleteness_iscentric  1
_reflns_odcompleteness_theta      27.42
_reflns_special_details
;
 Reflections were merged by SHELXL according to the crystal
 class for the calculation of statistics and refinement.
 
 _reflns_Friedel_fraction is defined as the number of unique
 Friedel pairs measured divided by the number that would be
 possible theoretically, ignoring centric projections and
 systematic absences.
;
_reflns_threshold_expression      'I > 2\s(I)'
_computing_cell_refinement        'CrysAlisPro 1.171.38.43 (Rigaku OD, 2015)'
_computing_data_collection        'CrysAlisPro 1.171.38.43 (Rigaku OD, 2015)'
_computing_data_reduction         'CrysAlisPro 1.171.38.43 (Rigaku OD, 2015)'
_computing_molecular_graphics     'Olex2 (Dolomanov et al., 2009)'
_computing_publication_material   'Olex2 (Dolomanov et al., 2009)'
_computing_structure_refinement   'ShelXL (Sheldrick, 2015)'
_computing_structure_solution     'ShelXT (Sheldrick, 2015)'
_refine_diff_density_max          0.395
_refine_diff_density_min          -0.436
_refine_diff_density_rms          0.071
_refine_ls_abs_structure_details
;
 Flack x determined using 741 quotients [(I+)-(I-)]/[(I+)+(I-)]
 (Parsons, Flack and Wagner, Acta Cryst. B69 (2013) 249-259).
;
_refine_ls_abs_structure_Flack    0.13(11)
_refine_ls_extinction_coef        .
_refine_ls_extinction_method      none
_refine_ls_goodness_of_fit_ref    1.044
_refine_ls_hydrogen_treatment     constr
_refine_ls_matrix_type            full
_refine_ls_number_parameters      346
_refine_ls_number_reflns          4583
_refine_ls_number_restraints      1
_refine_ls_R_factor_all           0.0846
_refine_ls_R_factor_gt            0.0639
_refine_ls_restrained_S_all       1.044
_refine_ls_shift/su_max           0.000
_refine_ls_shift/su_mean          0.000
_refine_ls_structure_factor_coef  Fsqd
_refine_ls_weighting_details
'w=1/[\s^2^(Fo^2^)+(0.0680P)^2^] where P=(Fo^2^+2Fc^2^)/3'
_refine_ls_weighting_scheme       calc
_refine_ls_wR_factor_gt           0.1415
_refine_ls_wR_factor_ref          0.1580
_refine_special_details           ?
_olex2_refinement_description
;
1. Fixed Uiso
 At 1.2 times of:
  All C(H) groups, All C(H,H) groups
 At 1.5 times of:
  All C(H,H,H) groups
2.a Ternary CH refined with riding coordinates:
 C19(H19), C18(H18)
2.b Secondary CH2 refined with riding coordinates:
 C10(H10a,H10b), C9(H9a,H9b), C27(H27a,H27b), C8(H8a,H8b)
2.c Aromatic/amide H refined with riding coordinates:
 C17(H17), C25(H25), C13(H13), C4(H4), C7(H7), C12(H12), C3(H3), C21(H21),
 C6(H6), C16(H16), C24(H24), C22(H22), C23(H23)
2.d Idealised Me refined as rotating group:
 C15(H15a,H15b,H15c), C1(H1a,H1b,H1c), C28(H28a,H28b,H28c)
;
_atom_sites_solution_hydrogens    geom
_atom_sites_solution_primary      dual
_atom_sites_solution_secondary    ?
loop_
  _atom_site_label
  _atom_site_type_symbol
  _atom_site_fract_x
  _atom_site_fract_y
  _atom_site_fract_z
  _atom_site_U_iso_or_equiv
  _atom_site_adp_type
  _atom_site_occupancy
  _atom_site_site_symmetry_order
  _atom_site_calc_flag
  _atom_site_refinement_flags_posn
  _atom_site_refinement_flags_adp
  _atom_site_refinement_flags_occupancy
  _atom_site_disorder_assembly
  _atom_site_disorder_group
 S2 S 0.66193(10) 0.89985(14) 0.21395(8) 0.0250(3) Uani 1 1 d . . . . .
 S1 S 0.71186(10) 1.10321(15) 0.38049(9) 0.0305(4) Uani 1 1 d . . . . .
 O3 O 0.6671(3) 1.0262(4) 0.1841(2) 0.0330(11) Uani 1 1 d . . . . .
 O6 O 0.4427(3) 0.6249(4) 0.3381(2) 0.0300(10) Uani 1 1 d . . . . .
 O4 O 0.7501(3) 0.8455(4) 0.2436(2) 0.0328(11) Uani 1 1 d . . . . .
 O1 O 0.7206(3) 1.2055(5) 0.3313(3) 0.0434(13) Uani 1 1 d . . . . .
 N2 N 0.5736(3) 0.8947(5) 0.2723(3) 0.0228(11) Uani 1 1 d . . . . .
 O2 O 0.7891(3) 1.0059(5) 0.3845(3) 0.0446(13) Uani 1 1 d . . . . .
 N1 N 0.6056(3) 1.0242(4) 0.3737(3) 0.0251(11) Uani 1 1 d . . . . .
 O5 O 0.6096(3) 0.6131(4) 0.3399(3) 0.0386(12) Uani 1 1 d . . . . .
 C19 C 0.5302(4) 0.8054(6) 0.3838(3) 0.0236(12) Uani 1 1 d . . . . .
 H19 H 0.4624 0.8407 0.3786 0.028 Uiso 1 1 calc R . . . .
 C17 C 0.6150(5) 0.6605(6) 0.1657(4) 0.0317(15) Uani 1 1 d . . . . .
 H17 H 0.6322 0.6301 0.2087 0.038 Uiso 1 1 calc R . . . .
 C25 C 0.6435(5) 0.7489(6) 0.4805(4) 0.0340(15) Uani 1 1 d . . . . .
 H25 H 0.6919 0.7244 0.4489 0.041 Uiso 1 1 calc R . . . .
 C10 C 0.4826(4) 0.9722(6) 0.2562(3) 0.0279(14) Uani 1 1 d . . . . .
 H10A H 0.4241 0.9292 0.2750 0.033 Uiso 1 1 calc R . . . .
 H10B H 0.4742 0.9773 0.2073 0.033 Uiso 1 1 calc R . . . .
 C11 C 0.6175(4) 0.7926(6) 0.1512(3) 0.0247(13) Uani 1 1 d . . . . .
 C9 C 0.4904(4) 1.1083(6) 0.2853(3) 0.0271(14) Uani 1 1 d . . . . .
 H9A H 0.4273 1.1534 0.2789 0.032 Uiso 1 1 calc R . . . .
 H9B H 0.5419 1.1561 0.2612 0.032 Uiso 1 1 calc R . . . .
 C18 C 0.6040(4) 0.8935(5) 0.3439(3) 0.0230(13) Uani 1 1 d . . . . .
 H18 H 0.6713 0.8561 0.3472 0.028 Uiso 1 1 calc R . . . .
 C13 C 0.5663(5) 0.7508(7) 0.0371(4) 0.0376(16) Uani 1 1 d . . . . .
 H13 H 0.5507 0.7822 -0.0059 0.045 Uiso 1 1 calc R . . . .
 C4 C 0.7115(4) 1.3102(6) 0.4669(4) 0.0327(15) Uani 1 1 d . . . . .
 H4 H 0.7203 1.3623 0.4287 0.039 Uiso 1 1 calc R . . . .
 C7 C 0.6846(4) 1.1534(7) 0.5809(4) 0.0335(15) Uani 1 1 d . . . . .
 H7 H 0.6754 1.1012 0.6190 0.040 Uiso 1 1 calc R . . . .
 C14 C 0.5628(4) 0.6181(6) 0.0493(4) 0.0302(14) Uani 1 1 d . . . . .
 C27 C 0.4387(5) 0.4959(6) 0.3065(4) 0.0364(16) Uani 1 1 d . . . . .
 H27A H 0.4854 0.4372 0.3286 0.044 Uiso 1 1 calc R . . . .
 H27B H 0.4558 0.5014 0.2586 0.044 Uiso 1 1 calc R . . . .
 C12 C 0.5928(4) 0.8374(6) 0.0880(4) 0.0326(16) Uani 1 1 d . . . . .
 H12 H 0.5938 0.9263 0.0791 0.039 Uiso 1 1 calc R . . . .
 C3 C 0.7087(5) 1.3644(6) 0.5322(4) 0.0350(16) Uani 1 1 d . . . . .
 H3 H 0.7159 1.4539 0.5373 0.042 Uiso 1 1 calc R . . . .
 C8 C 0.5157(4) 1.1048(6) 0.3607(3) 0.0272(14) Uani 1 1 d . . . . .
 H8A H 0.5275 1.1927 0.3767 0.033 Uiso 1 1 calc R . . . .
 H8B H 0.4593 1.0694 0.3857 0.033 Uiso 1 1 calc R . . . .
 C5 C 0.7007(4) 1.1766(6) 0.4611(4) 0.0285(14) Uani 1 1 d . . . . .
 C26 C 0.5333(4) 0.6708(6) 0.3515(3) 0.0232(12) Uani 1 1 d . . . . .
 C2 C 0.6956(4) 1.2881(7) 0.5888(4) 0.0323(15) Uani 1 1 d . . . . .
 C21 C 0.4810(5) 0.8307(6) 0.5062(4) 0.0307(15) Uani 1 1 d . . . . .
 H21 H 0.4195 0.8623 0.4913 0.037 Uiso 1 1 calc R . . . .
 C6 C 0.6872(4) 1.0975(6) 0.5175(4) 0.0320(15) Uani 1 1 d . . . . .
 H6 H 0.6800 1.0080 0.5125 0.038 Uiso 1 1 calc R . . . .
 C16 C 0.5863(5) 0.5745(6) 0.1145(4) 0.0350(16) Uani 1 1 d . . . . .
 H16 H 0.5827 0.4860 0.1240 0.042 Uiso 1 1 calc R . . . .
 C15 C 0.5363(5) 0.5222(7) -0.0048(4) 0.0394(18) Uani 1 1 d . . . . .
 H15A H 0.5965 0.4883 -0.0248 0.059 Uiso 1 1 calc GR . . . .
 H15B H 0.4970 0.5644 -0.0392 0.059 Uiso 1 1 calc GR . . . .
 H15C H 0.4984 0.4522 0.0148 0.059 Uiso 1 1 calc GR . . . .
 C24 C 0.6622(5) 0.7373(6) 0.5506(4) 0.0380(17) Uani 1 1 d . . . . .
 H24 H 0.7239 0.7073 0.5659 0.046 Uiso 1 1 calc R . . . .
 C22 C 0.4995(5) 0.8180(7) 0.5757(4) 0.0391(17) Uani 1 1 d . . . . .
 H22 H 0.4511 0.8417 0.6074 0.047 Uiso 1 1 calc R . . . .
 C23 C 0.5886(5) 0.7708(6) 0.5961(4) 0.0364(16) Uani 1 1 d . . . . .
 H23 H 0.6007 0.7605 0.6424 0.044 Uiso 1 1 calc R . . . .
 C1 C 0.6928(5) 1.3463(8) 0.6593(4) 0.047(2) Uani 1 1 d . . . . .
 H1A H 0.7008 1.4390 0.6563 0.071 Uiso 1 1 calc GR . . . .
 H1B H 0.7463 1.3104 0.6861 0.071 Uiso 1 1 calc GR . . . .
 H1C H 0.6298 1.3265 0.6804 0.071 Uiso 1 1 calc GR . . . .
 C20 C 0.5539(4) 0.7964(6) 0.4594(4) 0.0280(14) Uani 1 1 d . . . . .
 C28 C 0.3335(5) 0.4482(7) 0.3150(5) 0.0459(19) Uani 1 1 d . . . . .
 H28A H 0.2876 0.5140 0.2997 0.069 Uiso 1 1 calc GR . . . .
 H28B H 0.3212 0.4297 0.3621 0.069 Uiso 1 1 calc GR . . . .
 H28C H 0.3242 0.3705 0.2887 0.069 Uiso 1 1 calc GR . . . .

loop_
  _atom_site_aniso_label
  _atom_site_aniso_U_11
  _atom_site_aniso_U_22
  _atom_site_aniso_U_33
  _atom_site_aniso_U_23
  _atom_site_aniso_U_13
  _atom_site_aniso_U_12
 S2 0.0246(7) 0.0296(7) 0.0208(7) -0.0024(7) 0.0017(7) -0.0040(6)
 S1 0.0237(7) 0.0388(8) 0.0290(9) -0.0117(8) 0.0028(7) -0.0080(6)
 O3 0.040(2) 0.031(2) 0.028(3) -0.001(2) 0.004(2) -0.011(2)
 O6 0.027(2) 0.028(2) 0.034(3) -0.002(2) -0.002(2) -0.0051(17)
 O4 0.0221(19) 0.045(3) 0.031(3) -0.007(2) 0.0023(19) 0.0016(19)
 O1 0.049(3) 0.048(3) 0.033(3) -0.007(3) 0.010(2) -0.028(2)
 N2 0.019(2) 0.034(3) 0.015(3) -0.003(2) 0.003(2) -0.001(2)
 O2 0.024(2) 0.060(3) 0.050(3) -0.032(3) -0.004(2) 0.001(2)
 N1 0.023(2) 0.027(2) 0.026(3) -0.003(3) 0.001(2) -0.0039(19)
 O5 0.033(2) 0.041(3) 0.041(3) -0.010(3) 0.005(2) 0.003(2)
 C19 0.022(2) 0.029(3) 0.020(3) -0.001(3) 0.003(3) 0.001(2)
 C17 0.042(3) 0.032(3) 0.020(3) 0.000(3) 0.007(3) -0.006(3)
 C25 0.041(4) 0.033(4) 0.028(4) 0.001(3) 0.001(3) 0.001(3)
 C10 0.026(3) 0.037(3) 0.020(3) 0.002(3) -0.004(3) 0.003(3)
 C11 0.024(3) 0.025(3) 0.025(4) 0.000(3) 0.004(3) -0.002(2)
 C9 0.020(3) 0.031(3) 0.030(4) 0.002(3) -0.001(3) 0.003(2)
 C18 0.024(3) 0.026(3) 0.019(3) -0.002(3) -0.001(2) -0.001(2)
 C13 0.045(4) 0.045(4) 0.022(4) -0.007(3) -0.008(3) 0.010(3)
 C4 0.038(3) 0.029(3) 0.031(4) -0.007(3) -0.001(3) -0.004(3)
 C7 0.033(3) 0.042(4) 0.026(4) -0.001(3) -0.006(3) 0.002(3)
 C14 0.027(3) 0.035(3) 0.029(4) -0.008(3) 0.000(3) 0.001(3)
 C27 0.041(3) 0.033(3) 0.035(4) 0.000(3) -0.005(3) -0.012(3)
 C12 0.038(3) 0.024(3) 0.035(4) -0.008(3) -0.004(3) 0.004(3)
 C3 0.037(3) 0.031(3) 0.037(4) -0.012(3) -0.003(3) -0.005(3)
 C8 0.024(3) 0.031(3) 0.026(4) -0.006(3) -0.003(3) 0.000(2)
 C5 0.022(3) 0.029(3) 0.035(4) -0.005(3) -0.003(3) -0.003(2)
 C26 0.028(3) 0.027(3) 0.015(3) -0.001(3) 0.000(2) 0.000(2)
 C2 0.022(3) 0.044(4) 0.030(4) -0.011(3) -0.004(3) 0.005(3)
 C21 0.036(3) 0.028(3) 0.029(4) -0.001(3) -0.007(3) 0.000(3)
 C6 0.030(3) 0.036(3) 0.030(4) -0.005(3) -0.006(3) 0.001(3)
 C16 0.045(4) 0.029(3) 0.031(4) -0.002(3) 0.008(3) -0.010(3)
 C15 0.041(4) 0.044(4) 0.034(4) -0.017(4) -0.002(3) -0.004(3)
 C24 0.037(3) 0.035(4) 0.043(5) -0.004(4) -0.012(3) 0.000(3)
 C22 0.045(4) 0.036(4) 0.037(4) -0.009(4) 0.005(3) 0.002(3)
 C23 0.041(3) 0.038(4) 0.031(4) -0.005(3) -0.008(3) -0.004(3)
 C1 0.052(4) 0.054(5) 0.036(5) -0.020(4) -0.009(4) 0.003(4)
 C20 0.029(3) 0.025(3) 0.031(4) -0.005(3) -0.002(3) -0.003(2)
 C28 0.043(4) 0.044(4) 0.051(5) -0.008(4) -0.002(4) -0.013(3)

_geom_special_details
;
 All esds (except the esd in the dihedral angle between two l.s. planes)
 are estimated using the full covariance matrix.  The cell esds are taken
 into account individually in the estimation of esds in distances, angles
 and torsion angles; correlations between esds in cell parameters are only
 used when they are defined by crystal symmetry.  An approximate (isotropic)
 treatment of cell esds is used for estimating esds involving l.s. planes.
;
loop_
  _geom_bond_atom_site_label_1
  _geom_bond_atom_site_label_2
  _geom_bond_distance
  _geom_bond_site_symmetry_2
  _geom_bond_publ_flag
 S2 O3 1.426(4) . ?
 S2 O4 1.427(4) . ?
 S2 N2 1.645(5) . ?
 S2 C11 1.758(6) . ?
 S1 O1 1.433(5) . ?
 S1 O2 1.438(5) . ?
 S1 N1 1.639(5) . ?
 S1 C5 1.761(7) . ?
 O6 C27 1.465(7) . ?
 O6 C26 1.324(6) . ?
 N2 C10 1.486(7) . ?
 N2 C18 1.466(8) . ?
 N1 C18 1.465(7) . ?
 N1 C8 1.481(7) . ?
 O5 C26 1.200(6) . ?
 C19 C18 1.551(8) . ?
 C19 C26 1.523(8) . ?
 C19 C20 1.521(9) . ?
 C17 C11 1.387(9) . ?
 C17 C16 1.394(9) . ?
 C25 C24 1.406(10) . ?
 C25 C20 1.356(9) . ?
 C10 C9 1.514(8) . ?
 C11 C12 1.365(9) . ?
 C9 C8 1.519(9) . ?
 C13 C14 1.384(9) . ?
 C13 C12 1.385(9) . ?
 C4 C3 1.399(10) . ?
 C4 C5 1.386(8) . ?
 C7 C2 1.401(9) . ?
 C7 C6 1.372(9) . ?
 C14 C16 1.393(10) . ?
 C14 C15 1.493(9) . ?
 C27 C28 1.496(9) . ?
 C3 C2 1.372(10) . ?
 C5 C6 1.387(9) . ?
 C2 C1 1.511(10) . ?
 C21 C22 1.394(10) . ?
 C21 C20 1.385(9) . ?
 C24 C23 1.374(10) . ?
 C22 C23 1.345(9) . ?

loop_
  _geom_angle_atom_site_label_1
  _geom_angle_atom_site_label_2
  _geom_angle_atom_site_label_3
  _geom_angle
  _geom_angle_site_symmetry_1
  _geom_angle_site_symmetry_3
  _geom_angle_publ_flag
 O3 S2 O4 119.0(3) . . ?
 O3 S2 N2 110.5(3) . . ?
 O3 S2 C11 107.4(3) . . ?
 O4 S2 N2 107.1(3) . . ?
 O4 S2 C11 108.6(3) . . ?
 N2 S2 C11 103.1(3) . . ?
 O1 S1 O2 119.2(3) . . ?
 O1 S1 N1 112.3(3) . . ?
 O1 S1 C5 107.4(3) . . ?
 O2 S1 N1 106.3(3) . . ?
 O2 S1 C5 108.0(3) . . ?
 N1 S1 C5 102.2(3) . . ?
 C26 O6 C27 116.1(5) . . ?
 C10 N2 S2 114.9(4) . . ?
 C18 N2 S2 118.2(4) . . ?
 C18 N2 C10 115.7(5) . . ?
 C18 N1 S1 120.0(4) . . ?
 C18 N1 C8 115.5(4) . . ?
 C8 N1 S1 116.0(4) . . ?
 C26 C19 C18 107.6(5) . . ?
 C20 C19 C18 113.4(5) . . ?
 C20 C19 C26 110.3(5) . . ?
 C11 C17 C16 118.6(7) . . ?
 C20 C25 C24 119.1(7) . . ?
 N2 C10 C9 111.0(5) . . ?
 C17 C11 S2 118.5(5) . . ?
 C12 C11 S2 120.6(5) . . ?
 C12 C11 C17 120.8(6) . . ?
 C10 C9 C8 111.2(5) . . ?
 N2 C18 C19 108.4(5) . . ?
 N1 C18 N2 112.4(5) . . ?
 N1 C18 C19 110.0(5) . . ?
 C14 C13 C12 121.2(7) . . ?
 C5 C4 C3 117.8(7) . . ?
 C6 C7 C2 120.8(7) . . ?
 C13 C14 C16 117.9(6) . . ?
 C13 C14 C15 122.3(7) . . ?
 C16 C14 C15 119.7(6) . . ?
 O6 C27 C28 106.5(6) . . ?
 C11 C12 C13 120.1(6) . . ?
 C2 C3 C4 121.3(6) . . ?
 N1 C8 C9 111.3(5) . . ?
 C4 C5 S1 119.3(6) . . ?
 C4 C5 C6 121.9(7) . . ?
 C6 C5 S1 118.7(5) . . ?
 O6 C26 C19 112.5(5) . . ?
 O5 C26 O6 124.1(5) . . ?
 O5 C26 C19 123.4(5) . . ?
 C7 C2 C1 119.4(7) . . ?
 C3 C2 C7 119.2(7) . . ?
 C3 C2 C1 121.5(7) . . ?
 C20 C21 C22 120.1(6) . . ?
 C7 C6 C5 119.0(6) . . ?
 C14 C16 C17 121.5(6) . . ?
 C23 C24 C25 119.4(6) . . ?
 C23 C22 C21 118.9(7) . . ?
 C22 C23 C24 121.8(7) . . ?
 C25 C20 C19 120.2(6) . . ?
 C25 C20 C21 120.6(7) . . ?
 C21 C20 C19 119.2(5) . . ?

loop_
  _refln_index_h
  _refln_index_k
  _refln_index_l
  _refln_F_squared_meas
  _refln_F_squared_sigma
  _refln_scale_group_code
 0 0 -24 12529.1 1225.02 2
 0 0 -23 771.888 334.873 2
 0 0 -22 2132.66 484.468 2
 0 0 -21 397.618 257.609 2
 0 0 -20 967.06 309.601 2
 0 0 -19 337.311 213.942 2
 0 0 -18 14042.7 1088.49 2
 0 0 -17 264.27 185.201 2
 0 0 -16 13817.9 1003.73 2
 0 0 -15 866.939 263.042 2
 0 0 -14 9295.17 767.404 2
 0 0 -13 564.415 199.593 2
 0 0 -12 3116.47 417.095 2
 0 0 -11 663.956 210.26 2
 0 0 -10 48510.1 1464.73 2
 0 0 -9 140.81 98.3111 2
 0 0 -8 64248.4 1539.33 2
 0 0 -7 457.88 153.279 2
 0 0 -6 119854 1816.9 2
 0 0 -5 -8.3476 58.7145 2
 0 0 -4 134344 1578.61 2
 0 0 -3 14.5447 33.5173 2
 0 0 3 23.0711 40.192 2
 0 0 4 138117 1657.65 2
 0 0 5 221.833 109.113 2
 0 0 6 121387 1956.83 2
 0 0 7 293.565 126.33 2
 0 1 -25 53.0506 104.482 2
 0 1 -24 2677.09 567.612 2
 0 1 -23 58.9015 110.803 2
 0 1 -22 761.649 293.431 2
 0 1 -21 27.2855 93.6976 2
 0 -1 -20 5336.76 729.661 2
 0 1 -20 4173.57 625.376 2
 0 1 -19 -31.1155 112.985 2
 0 -1 -19 -49.4323 79.6247 2
 0 -1 -18 3442.48 549.693 2
 0 1 -18 2198.69 440.506 2
 0 1 -17 -43.951 145.003 2
 0 -1 -17 259.025 217.646 2
 0 1 -16 16843.1 1115.05 2
 0 -1 -16 16905 1117.94 2
 0 -1 -15 -90.3599 122.836 2
 0 1 -15 44.6487 120.834 2
 0 -1 -14 11321.3 845.411 2
 0 1 -14 10183.6 809.233 2
 0 1 -13 27.8104 105.521 2
 0 -1 -13 21.7941 95.2959 2
 0 -1 -12 17924 981.331 2
 0 1 -12 17525.7 985.528 2
 0 1 -11 17.9592 91.7382 2
 0 -1 -11 27.875 91.1432 2
 0 -1 -10 64568.1 1705.93 2
 0 1 -10 60986.3 1685.03 2
 0 -1 -9 -24.1283 62.0816 2
 0 1 -9 79.0659 70.2304 2
 0 1 -8 55249.4 1407.94 2
 0 -1 -8 57593.2 1453.15 2
 0 -1 -7 -66.1589 57.7179 2
 0 1 -7 -14.7831 53.0298 2
 0 1 -6 205119 2409.17 2
 0 -1 -6 209467 2417.15 2
 0 -1 -5 25.0454 61.8233 2
 0 1 -5 -9.85487 48.0228 2
 0 1 -4 45911.6 957.159 2
 0 -1 -4 48584.6 992.096 2
 0 1 -3 -3.364 44.7504 2
 0 1 -2 61778 852.675 2
 0 -1 2 64501.6 905.605 2
 0 -1 3 22.7675 34.0648 2
 0 1 3 22.8983 35.4094 2
 0 1 4 44975.3 1015.28 2
 0 -1 4 44967.3 981.356 2
 0 -1 5 -75.7597 57.0687 2
 0 1 5 -30.102 62.8371 2
 0 -1 6 214933 2627.97 2
 0 1 6 209093 2636.89 2
 0 -1 7 27.2088 69.6519 2
 0 2 -25 41.1324 141.61 2
 0 2 -24 562.547 227.453 2
 0 2 -23 -31.2938 121.776 2
 0 2 -22 752.746 268.441 2
 0 2 -21 156.809 176.478 2
 0 2 -20 1609.24 386.025 2
 0 2 -19 98.4379 140.991 2
 0 2 -18 519.834 237.508 2
 0 2 -17 343.696 244.716 2
 0 2 -16 15320.5 1069.22 2
 0 2 -15 119.658 134.139 2
 0 2 -14 564.196 220.064 2
 0 2 -13 -2.52928 65.2231 2
 0 2 -12 9445.55 716.815 2
 0 2 -11 -7.98828 62.3905 2
 0 2 -10 27561.4 1145.89 2
 0 2 -9 54.9145 66.7366 2
 0 2 -8 30545.3 1108.57 2
 0 2 -7 56.6995 57.2785 2
 0 2 -6 20519.5 801.839 2
 0 2 -5 17.0021 65.7084 2
 0 2 -4 3181.23 278.224 2
 0 2 -3 50.2072 73.7736 2
 0 2 -2 192150 1857.66 2
 0 2 -1 107.075 37.859 2
 0 -2 -1 55.1699 29.8456 1
 0 2 1 108.093 45.5773 1
 0 2 2 186799 1518.94 1
 0 -2 2 188547 1856.23 2
 0 -2 3 19.6155 47.6774 2
 0 -2 4 3199.63 295.24 2
 0 2 5 -9.95445 54.9438 2
 0 -2 5 28.2377 54.5943 2
 0 -2 6 19971.3 842.978 2
 0 3 -24 711.032 293.602 2
 0 3 -23 -14.8661 116.682 2
 0 3 -22 535.015 223.112 2
 0 3 -21 -19.2753 80.98 2
 0 3 -20 42.5178 114.796 2
 0 3 -19 66.4803 160.27 2
 0 3 -18 572.504 271.746 2
 0 3 -17 8.67929 158.508 2
 0 3 -16 5863.77 687.083 2
 0 3 -15 19.3019 130.819 2
 0 3 -14 11876.6 887.956 2
 0 3 -13 51.3163 115.935 2
 0 3 -12 6148.51 600.019 2
 0 3 -11 -19.5501 88.484 2
 0 3 -10 12691.3 813.909 2
 0 3 -9 20.4596 53.8438 2
 0 3 -8 21647 959.953 2
 0 3 -7 -106.641 88.6494 2
 0 3 -6 44244.6 1267.05 2
 0 3 -5 -17.23 57.6904 2
 0 3 -4 43678.2 1153.82 2
 0 3 -3 -28.9477 58.7392 2
 0 -3 -2 3824.05 286.041 1
 0 3 -2 2835.5 270.326 2
 0 -3 -1 14.2463 47.947 1
 0 -3 0 47125.7 863.272 1
 0 3 2 2798.54 217.824 1
 0 -3 3 33.6646 35.4008 2
 0 3 3 47.8364 36.0407 1
 0 -3 4 40712.7 1146.9 2
 0 3 4 43260.9 964.777 1
 0 -3 5 -98.5353 78.641 2
 0 4 -24 1832.36 454.2 2
 0 4 -23 296.708 189.321 2
 0 4 -22 1811.93 441.33 2
 0 4 -21 37.7598 151.716 2
 0 4 -20 1654.2 433.419 2
 0 4 -19 215.87 247.188 2
 0 4 -18 4939.12 684.12 2
 0 4 -17 239.498 191.902 2
 0 4 -16 10864.7 927.254 2
 0 4 -15 179.391 187.982 2
 0 4 -14 12196.5 936.808 2
 0 4 -13 -54.8838 70.6694 2
 0 4 -12 3948.66 516.069 2
 0 4 -11 -13.8221 71.6744 2
 0 4 -10 10424.9 755.284 2
 0 4 -9 126.114 112.312 2
 0 4 -8 9159.13 655.879 2
 0 4 -7 7.35415 64.9108 2
 0 4 -6 20587.3 919.095 2
 0 4 -5 72.9953 82.6161 2
 0 4 -4 9520.84 587.123 2
 0 -4 -3 43.1989 53.4291 1
 0 4 -3 -89.15 73.1404 2
 0 4 -2 36146 1086.99 2
 0 -4 -2 35941.5 849.385 1
 0 -4 -1 -38.8363 54.4068 1
 0 -4 0 52555.7 1059.4 1
 0 4 2 35072.2 854.27 1
 0 4 3 28.6683 38.5708 1
 0 4 4 8264.68 454.09 1
 0 4 5 -19.8031 39.4457 1
 0 4 6 21349.3 826.531 1
 0 5 -23 144.828 183.286 2
 0 5 -22 2932.69 573.146 2
 0 5 -21 -178.572 158.012 2
 0 5 -20 3013.17 562.929 2
 0 5 -19 -52.0391 97.4187 2
 0 5 -18 3053.69 528.139 2
 0 5 -17 139.178 131.823 2
 0 5 -16 2195.82 438.55 2
 0 5 -15 -8.25893 80.8781 2
 0 5 -14 15734.7 1104.72 2
 0 5 -13 44.928 104.484 2
 0 5 -12 13615.7 961.7 2
 0 5 -11 -16.5041 103.284 2
 0 5 -10 10744.9 801.891 2
 0 5 -9 24.9791 95.5649 2
 0 5 -8 1964.62 330.367 2
 0 5 -7 -51.5542 55.1662 2
 0 5 -6 4796.06 482.196 2
 0 5 -5 180.412 128.307 2
 0 5 -4 15433.8 824.707 2
 0 5 -3 -46.3032 82.0019 2
 0 -5 -3 -34.6131 44.4459 1
 0 -5 -2 11503.6 532.906 1
 0 5 -2 10481.5 657.559 2
 0 -5 -1 65.9317 56.1613 1
 0 -5 0 4.75899 61.7967 1
 0 -5 1 100.628 60.3701 1
 0 5 3 -23.813 38.8113 1
 0 5 4 14119.8 633.544 1
 0 5 5 43.5061 38.3842 1
 0 5 6 4736.75 413.513 1
 0 6 -22 415.053 253.897 2
 0 6 -21 -242.925 184.426 2
 0 6 -20 921.709 313.521 2
 0 6 -19 -11.3031 83.3933 2
 0 6 -18 8237.44 901.863 2
 0 6 -17 47.1386 95.2042 2
 0 6 -16 3322.75 561.554 2
 0 6 -15 -74.5208 153.476 2
 0 6 -14 6125.37 717.645 2
 0 6 -13 18.6947 73.6125 2
 0 6 -12 18060.1 1143.84 2
 0 6 -11 -21.6766 87.8302 2
 0 6 -10 9609.32 801.455 2
 0 6 -9 -85.4686 113.148 2
 0 6 -8 973.487 252.366 2
 0 6 -7 5.95374 83.1222 2
 0 6 -6 4979.78 545.44 2
 0 6 -5 -31.6758 98.064 2
 0 6 -4 1518.06 280.419 2
 0 -6 -3 -79.8575 65.0461 1
 0 6 -3 92.1848 115.101 2
 0 6 -2 912.319 219.719 2
 0 -6 -2 1218.54 203.031 1
 0 -6 -1 -12.7932 58.8767 1
 0 -6 0 807.148 167.645 1
 0 -6 1 -22.2173 54.6505 1
 0 6 4 944.28 181.415 1
 0 6 5 40.7789 39.7079 1
 0 7 -21 -95.6101 133.566 2
 0 7 -20 685.194 297.819 2
 0 7 -19 41.2763 166.317 2
 0 7 -18 2274.91 486.207 2
 0 7 -17 549.025 252.412 2
 0 7 -16 3478.87 596.031 2
 0 7 -15 246.855 189.423 2
 0 7 -14 425.482 224.198 2
 0 7 -13 245.569 124.797 2
 0 7 -12 229.151 107.152 2
 0 7 -11 212.475 180.607 2
 0 7 -10 4103.06 557.341 2
 0 7 -9 113.771 120.221 2
 0 7 -8 4025.14 519.747 2
 0 7 -7 495.852 199.263 2
 0 7 -6 13162.7 919.122 2
 0 7 -5 100.426 120.162 2
 0 7 -4 70.2826 65.9197 2
 0 7 -3 -32.6845 79.6178 2
 0 -7 -3 -8.14018 38.3057 1
 0 7 -2 2177.49 363.072 2
 0 -7 -2 2050.89 267.543 1
 0 7 -1 54.7234 73.5927 2
 0 -7 -1 119.717 86.4488 1
 0 -7 0 3066.58 342.892 1
 0 -7 1 47.3597 74.057 1
 0 -7 2 2252.87 309.67 1
 0 8 -20 789.01 325.282 2
 0 8 -19 7.04874 149.157 2
 0 8 -18 1782.34 449.361 2
 0 8 -17 176.905 173.877 2
 0 8 -16 1124.68 352.525 2
 0 8 -15 -14.3943 123.906 2
 0 8 -14 855.551 284.068 2
 0 8 -13 66.0489 182.591 2
 0 8 -12 762.956 266.521 2
 0 8 -11 159.242 142.329 2
 0 8 -10 228.864 158.345 2
 0 8 -9 138.421 93.0918 2
 0 8 -8 1856.12 383.291 2
 0 8 -7 70.3201 84.1741 2
 0 8 -6 10958.6 897.488 2
 0 8 -5 28.4672 158.71 2
 0 8 -4 4231.34 551.19 2
 0 8 -3 132.71 181.634 2
 0 -8 -3 86.3188 82.1248 1
 0 8 -2 4077.96 528.628 2
 0 -8 -2 3441.66 366.834 1
 0 8 -1 17.0285 101.062 2
 0 -8 -1 -8.74693 60.0906 1
 0 -8 0 8703.34 603.988 1
 0 -8 1 -79.5107 87.482 1
 0 -8 2 3563.91 416.877 1
 0 -8 3 75.9545 91.8908 1
 0 9 -18 4163.64 712.974 2
 0 9 -17 53.0515 183.439 2
 0 9 -16 1191.37 354.881 2
 0 9 -15 87.3643 84.1142 2
 0 9 -14 1259.99 362.88 2
 0 9 -13 176.764 133.029 2
 0 9 -12 6715.57 794.157 2
 0 9 -11 58.4043 106.138 2
 0 9 -10 607.111 257.358 2
 0 9 -9 57.5726 119.806 2
 0 9 -8 2751.44 497.091 2
 0 9 -7 29.7117 96.3074 2
 0 9 -6 3662.3 562.323 2
 0 9 -5 34.0589 98.9806 2
 0 9 -4 7623.22 777.958 2
 0 9 -3 -9.73332 101.04 2
 0 -9 -3 35.2768 54.0833 1
 0 9 -2 8270.49 815.919 2
 0 -9 -2 4850.38 457.334 1
 0 9 -1 -191.238 132.701 2
 0 -9 -1 -80.1602 75.3447 1
 0 9 0 9731.76 871.168 2
 0 -9 0 7541.76 595.218 1
 0 -9 1 -114.231 95.8087 1
 0 -9 2 9234.52 693.045 1
 0 -9 3 418.149 187.565 1
 0 -9 4 7548.75 680.589 1
 0 10 -16 4147.59 722.945 2
 0 10 -15 48.1843 84.494 2
 0 10 -14 945.21 305.571 2
 0 10 -13 -11.5817 94.1947 2
 0 10 -12 6882.49 841.963 2
 0 10 -11 229.122 151.643 2
 0 10 -10 1263.22 357.538 2
 0 10 -9 21.3478 94.1453 2
 0 10 -8 2211.46 470.224 2
 0 10 -7 -0.45147 151.359 2
 0 10 -6 3567.08 581.368 2
 0 10 -5 -101.107 99.6415 2
 0 10 -4 1885.4 421.339 2
 0 10 -3 362.357 220.333 2
 0 10 -2 10312.6 976.784 2
 0 10 -1 -77.2423 99.9987 2
 0 10 0 14091.4 1133.13 2
 0 -10 2 6851.11 638.439 1
 0 -10 3 -33.9267 97.0773 1
 0 -10 4 1521.57 328.107 1
 0 -10 5 -1.0199 75.9027 1
 0 -10 6 1991.42 390.6 1
 0 11 -14 91.168 167.4 2
 0 11 -13 -89.9289 134.382 2
 0 11 -12 2365.36 517.029 2
 0 11 -11 -381.939 220.756 2
 0 11 -10 197.6 186.446 2
 0 11 -9 171.384 238.517 2
 0 11 -8 -76.4931 96.5245 2
 0 11 -7 -237.403 175.15 2
 0 11 -6 5163.82 745.084 2
 0 11 -5 -32.8277 117.442 2
 0 11 -4 -43.8397 87.9021 2
 0 11 -3 -125.725 200.424 2
 0 11 -2 663.782 288.782 2
 0 11 -1 26.1037 105.715 2
 0 11 0 10212.3 1040.29 2
 0 11 1 -228.419 242.798 2
 0 12 -11 -138.283 208.611 2
 0 12 -10 1095.47 361.767 2
 0 12 -9 -288.58 196.278 2
 0 12 -8 13.4841 106.481 2
 0 12 -7 -381.434 224.197 2
 0 12 -6 394.741 202.674 2
 0 12 -5 210.028 163.767 2
 0 12 -4 382.504 230.934 2
 0 12 -3 -118.006 198.164 2
 0 12 -2 1587.44 445.122 2
 0 12 -1 398.11 240.424 2
 0 12 0 194.488 194.118 2
 0 12 1 -271.502 191.574 2
 0 12 2 977.088 355.887 2
 0 13 -5 454.895 283.495 2
 0 13 -4 757.247 333.728 2
 0 13 -3 -7.8614 161.353 2
 0 13 -2 692.77 310.98 2
 0 13 -1 87.5102 120.869 2
 0 13 0 1838.92 512.104 2
 0 13 1 -40.4176 113.692 2
 0 13 2 1051.41 359.086 2
 0 13 3 -144.708 153.619 2
 0 13 4 872.167 340.908 2
 1 0 -25 18.3105 92.7071 2
 1 0 -24 59.9714 188.024 2
 1 0 -23 168.352 175.981 2
 1 0 -22 308.196 236.459 2
 -1 0 -22 -198.008 199.652 2
 1 0 -21 2.38947 70.5058 2
 -1 0 -21 -147.679 161.801 2
 1 0 -20 25.6869 75.9643 2
 -1 0 -20 0.43556 80.166 2
 -1 0 -19 224.321 202.527 2
 1 0 -19 -8.49484 102.087 2
 1 0 -18 157.524 128.801 2
 -1 0 -18 -56.3363 71.9876 2
 -1 0 -17 166.233 169.526 2
 1 0 -17 -212.73 171.424 2
 1 0 -16 99.2125 105.854 2
 -1 0 -16 59.6295 97.3363 2
 1 0 -15 -43.0759 76.558 2
 -1 0 -15 168.005 157.423 2
 1 0 -14 270.12 221.102 2
 -1 0 -14 125.321 107.4 2
 -1 0 -13 -1.31705 99.6318 2
 1 0 -13 -195.298 136.03 2
 -1 0 -12 99.3136 81.2392 2
 1 0 -12 27.1218 98.7787 2
 1 0 -11 100.026 103.301 2
 -1 0 -11 -64.6341 56.721 2
 1 0 -10 15.8338 87.1089 2
 -1 0 -10 -41.1743 60.8235 2
 1 0 -9 -5.26126 85.9018 2
 -1 0 -9 1711.2 288.63 2
 -1 0 -8 -21.6703 66.3263 2
 1 0 -8 58.029 66.242 2
 1 0 -7 -61.2892 69.9956 2
 -1 0 -7 47.8826 50.8253 2
 1 0 -6 635.111 166.025 2
 -1 0 -6 45.9709 58.2895 2
 1 0 -5 54.0133 62.1151 2
 -1 0 -5 42.1891 49.3845 2
 -1 0 -4 -3.27682 48.2568 2
 1 0 -4 6.07807 49.9732 2
 1 0 -3 195.52 146.266 2
 -1 0 -3 -3.93185 27.9506 2
 1 0 -2 -7.12784 27.2422 2
 -1 0 2 -3.19209 26.7636 2
 -1 0 3 90.9566 86.9421 2
 1 0 3 13.1143 26.4941 2
 1 0 4 16.9376 37.2243 2
 -1 0 4 5.13145 52.279 2
 -1 0 5 -39.787 59.915 2
 1 0 5 -34.6727 47.1573 2
 1 0 6 92.8139 37.8121 2
 -1 0 6 109.145 118.975 2
 1 0 7 17.773 46.8443 2
 1 1 -25 195.202 188.859 2
 -1 1 -25 237.889 193.308 2
 1 1 -24 398.446 251.816 2
 -1 1 -24 386.647 176.496 2
 -1 1 -23 2839.5 559.857 2
 1 1 -23 2816.11 566.759 2
 1 -1 -22 2386.06 511.829 2
 -1 1 -22 1590.43 410.015 2
 1 1 -22 2108.37 469.864 2
 -1 1 -21 714.532 298.966 2
 1 -1 -21 687.997 291.542 2
 1 1 -21 735.34 289.618 2
 1 -1 -20 4607.07 677.77 2
 1 1 -20 4092.76 638.442 2
 -1 1 -20 3541.44 571.696 2
 1 1 -19 37.5841 98.4675 2
 -1 1 -19 328.156 197.445 2
 1 -1 -19 279.553 178.267 2
 1 1 -18 775.197 247.48 2
 1 -1 -18 788.304 281.967 2
 -1 1 -18 828.857 270.461 2
 -1 -1 -17 9427.49 861.339 2
 -1 1 -17 8541.68 806.856 2
 1 1 -17 8028.64 804.45 2
 1 -1 -17 8252.83 823.264 2
 -1 1 -16 5351.5 614.575 2
 -1 -1 -16 5670.88 644.962 2
 1 1 -16 5666.74 654.167 2
 1 -1 -16 5597.16 658.244 2
 -1 1 -15 1446.98 313.144 2
 1 -1 -15 1595.68 345.228 2
 1 1 -15 1680.89 349.666 2
 -1 -1 -15 2174.72 394.035 2
 -1 -1 -14 8074.97 720.566 2
 -1 1 -14 7621.88 681.779 2
 1 -1 -14 8312.97 743.89 2
 1 1 -14 8214.69 736.538 2
 1 1 -13 3457.1 468.104 2
 -1 -1 -13 3109.5 428.051 2
 -1 1 -13 3316.88 433.313 2
 1 -1 -13 2746.69 404.658 2
 -1 -1 -12 1205.65 267.642 2
 -1 1 -12 973.819 250.748 2
 1 -1 -12 731.323 211.481 2
 1 1 -12 804.057 239.667 2
 1 -1 -11 3069.99 406.256 2
 -1 -1 -11 4061.69 462.404 2
 -1 1 -11 4063.19 446.723 2
 1 1 -11 3519.66 433.094 2
 1 1 -10 7720.2 593.553 2
 -1 -1 -10 7565.59 578.434 2
 -1 1 -10 7752.6 582.462 2
 1 -1 -10 6914.08 566.381 2
 1 1 -9 9704.51 640.186 2
 -1 -1 -9 10990.3 681.285 2
 -1 1 -9 10290.5 645.777 2
 1 -1 -9 10249.9 660.585 2
 -1 -1 -8 142.722 68.9082 2
 -1 1 -8 304.541 121.214 2
 1 -1 -8 415.016 133.35 2
 1 1 -8 208.41 112.335 2
 1 1 -7 20999.1 859.617 2
 -1 1 -7 20391.2 791.853 2
 1 -1 -7 20087.5 811.396 2
 1 -1 -6 7330.38 460.64 2
 1 1 -6 7337.58 482.568 2
 -1 1 -6 7366.9 434.989 2
 -1 1 -5 4356.43 307.317 2
 1 -1 -5 5374.04 382.484 2
 1 1 -5 4484.54 346.92 2
 1 -1 -4 22072.9 669.433 2
 1 1 -4 22185.5 705.836 2
 -1 1 -4 20776.6 602.281 2
 1 1 -3 6628.98 365.603 2
 -1 1 -3 5605.82 276.097 2
 1 -1 -3 5347.72 299.895 2
 1 1 -2 51142 893.787 2
 -1 1 -2 51359.3 662.215 2
 1 -1 -2 52825 789.72 2
 1 1 -1 52379.7 818.532 2
 -1 -1 -1 50246.1 745.564 1
 1 1 0 865.362 98.6604 1
 -1 -1 0 916.157 103.232 1
 -1 -1 1 50722.1 807.896 2
 1 1 1 51768.5 779.387 1
 1 -1 2 52504.8 684.099 2
 1 1 2 50406.2 840.176 1
 -1 1 2 52286.7 811.86 2
 -1 -1 2 49737 902.14 2
 -1 -1 3 5874.88 350.159 2
 1 -1 3 5723.34 284.712 2
 -1 1 3 5393.95 309.414 2
 -1 1 4 21817.9 707.01 2
 1 -1 4 22304.5 644.754 2
 -1 -1 4 20440.8 716.812 2
 -1 -1 5 4498.83 366.384 2
 -1 1 5 4584.93 369.841 2
 1 1 5 4495.67 353.168 2
 1 -1 5 4550.12 337.814 2
 -1 -1 6 7755.93 521.112 2
 1 1 6 7799.27 506.536 2
 -1 1 6 7680.06 524.608 2
 1 -1 6 8229.25 505.622 2
 1 -1 7 20856.1 877.088 2
 1 2 -25 765.31 323.085 2
 -1 2 -25 1109.71 382.316 2
 1 2 -24 -78.6367 123.158 2
 -1 2 -24 29.4269 188.495 2
 1 2 -23 562.931 268.213 2
 -1 2 -23 545.819 280.439 2
 1 2 -22 2493.33 515.271 2
 -1 2 -22 2597.6 527.876 2
 1 2 -21 1441.88 385.177 2
 -1 2 -21 1516.7 392.32 2
 -1 2 -20 2162.24 448.977 2
 1 2 -20 3107.65 554.738 2
 1 2 -19 260.756 127.49 2
 -1 2 -19 472.118 219.903 2
 -1 2 -18 537.563 207.562 2
 1 2 -18 893.964 282.429 2
 -1 2 -17 6667.37 711.764 2
 1 -2 -17 5765.71 688.569 2
 1 2 -17 6378.23 732.819 2
 1 -2 -16 14816.1 1073.77 2
 1 2 -16 15227.7 1100.4 2
 -1 2 -16 14890.4 1037.23 2
 1 -2 -15 1613.69 335.09 2
 1 2 -15 1388.08 332.767 2
 -1 2 -15 2015.84 379.551 2
 1 -2 -14 5478.18 615.583 2
 -1 2 -14 6238.35 626.352 2
 1 2 -14 6824.57 677.909 2
 1 -2 -13 1610.53 314.733 2
 -1 2 -13 1970.06 349.345 2
 1 2 -13 2062.14 353.499 2
 -1 2 -12 1046.61 233.879 2
 1 2 -12 774.032 223.726 2
 1 -2 -12 849.848 218.593 2
 -1 2 -11 5998.86 540.691 2
 1 2 -11 5621.55 545.11 2
 1 -2 -11 5444.08 539.52 2
 1 -2 -10 11818.3 758.019 2
 1 2 -10 14387 851.739 2
 -1 2 -10 12424.7 733.232 2
 1 -2 -9 3081.73 376.325 2
 -1 2 -9 3983.31 404.24 2
 1 2 -9 3752.76 426.203 2
 1 -2 -8 3801.15 400.149 2
 -1 2 -8 4169.39 390.328 2
 1 2 -8 3621.09 396.335 2
 1 2 -7 7978.6 552.005 2
 -1 2 -7 7346.04 489.244 2
 -1 2 -6 11754.5 581.387 2
 1 2 -6 10496.1 600.194 2
 -1 2 -5 39629.1 977.899 2
 1 2 -5 39432.6 1100.1 2
 1 2 -4 67749.3 1358.96 2
 -1 2 -4 69483.8 1188.85 2
 1 2 -3 58145.6 1207.49 2
 -1 2 -3 63436.3 1046.92 2
 -1 2 -2 71532.3 1004.54 2
 -1 -2 -2 67937.9 1066.51 1
 1 2 -2 70733.2 1246.78 2
 -1 -2 -1 12580.4 442.524 1
 1 2 -1 11478 479.283 2
 -1 2 -1 11535.7 363.197 2
 -1 -2 0 320.952 77.1956 1
 1 2 1 12575.8 455.454 1
 -1 -2 2 68872.3 1238.43 2
 1 2 2 75038.3 1169.07 1
 1 -2 2 69287.3 998.478 2
 -1 -2 3 53602.7 1179.45 2
 1 2 3 57507 1097.58 1
 1 -2 4 73255 1282.45 2
 -1 -2 4 69039 1440.75 2
 1 2 4 67874.1 1289.66 1
 -1 2 4 70491.5 1365.44 2
 -1 -2 5 39783 1177.69 2
 -1 2 5 40236.8 1134 2
 1 -2 5 38997.5 1017 2
 1 -2 6 11043.7 596.819 2
 1 -2 7 8046.74 551.274 2
 1 3 -24 506.204 227.59 2
 -1 3 -24 198.147 236.875 2
 1 3 -23 713.962 294.948 2
 -1 3 -23 873.228 324.91 2
 1 3 -22 3200.73 597.761 2
 -1 3 -22 2787.13 537.144 2
 -1 3 -21 1635.15 402.257 2
 1 3 -21 1612.31 422.243 2
 -1 3 -20 2749.15 515.666 2
 1 3 -20 4370.78 667.654 2
 1 3 -19 888.807 284.624 2
 -1 3 -19 1165.15 326.734 2
 -1 3 -18 920.415 282.172 2
 1 3 -18 1077.55 314.014 2
 1 3 -17 3953.56 580.513 2
 -1 3 -17 4611.41 607.053 2
 1 3 -16 8449.93 815.238 2
 -1 3 -16 8054.51 783.037 2
 -1 3 -15 7517.3 740.26 2
 1 3 -15 7178.61 727.143 2
 -1 3 -14 12022.1 882.769 2
 1 3 -14 12490.2 940.636 2
 1 3 -13 7806.85 718.555 2
 -1 3 -13 7178.03 650.787 2
 -1 3 -12 2320.74 358.403 2
 1 3 -12 2242.61 382.186 2
 -1 3 -11 7597.94 636.224 2
 1 3 -11 7337.28 665.788 2
 -1 3 -10 19770 968.357 2
 1 3 -10 18921.6 1015.15 2
 1 3 -9 21579.7 1030.29 2
 -1 3 -9 20999.3 971.95 2
 -1 3 -8 52652.8 1444.38 2
 1 3 -8 53930.2 1566.88 2
 1 3 -7 5328.6 476.446 2
 -1 3 -7 5751.89 452.828 2
 -1 3 -6 7496.17 492.523 2
 1 3 -6 7650.61 544.957 2
 -1 3 -5 4211.67 350.681 2
 1 3 -5 4349.23 399.783 2
 1 3 -4 7949.96 518.735 2
 -1 3 -4 7820.24 454.353 2
 1 3 -3 3832.24 347.963 2
 -1 -3 -3 3844.18 292.732 1
 -1 3 -3 4081.8 316.975 2
 1 3 -2 62301.7 1347.22 2
 -1 -3 -2 58733.1 1110.57 1
 -1 3 -2 58466.5 1125.49 2
 -1 -3 -1 40533.9 916.34 1
 1 -3 -1 40324.2 594.203 1
 -1 -3 0 3047.26 256.041 1
 1 3 1 39564.2 925.837 1
 -1 3 2 57788.8 766.786 1
 1 3 2 62740.6 1191.67 1
 -1 -3 3 3970.68 360.792 2
 -1 3 3 4321.04 238.7 1
 1 3 3 3884.06 308.205 1
 1 -3 3 4160.64 315.186 2
 1 3 4 8096.12 475.834 1
 1 -3 4 8150.02 475.461 2
 -1 -3 4 8044.83 541.373 2
 1 3 5 4104.17 360.638 1
 1 -3 5 4030.87 359.416 2
 1 -3 6 8778.53 565.385 2
 1 3 6 8997.89 560.246 1
 1 4 -24 -8.29215 111.039 2
 -1 4 -24 125.207 106.763 2
 -1 4 -23 1407.32 417.692 2
 1 4 -23 1236.42 389.1 2
 -1 4 -22 931.584 319.422 2
 1 4 -22 1292.47 400.589 2
 1 4 -21 2126.29 478.403 2
 -1 4 -21 2524.69 509.78 2
 1 4 -20 1704.32 411.081 2
 -1 4 -20 1245.93 333.96 2
 1 4 -19 431.705 236.758 2
 -1 4 -19 564.663 258.401 2
 -1 4 -18 1117.66 315.579 2
 1 4 -18 1377.77 371.097 2
 -1 4 -17 239.394 150.385 2
 1 4 -17 -2.82819 75.6927 2
 1 4 -16 3139.84 518.375 2
 -1 4 -16 3795.52 545.952 2
 -1 4 -15 4994.01 595.443 2
 1 4 -15 4975.19 633.383 2
 1 4 -14 12367.6 964.186 2
 -1 4 -14 11722.4 891.916 2
 -1 4 -13 1527.79 324.138 2
 1 4 -13 1623.63 338.388 2
 -1 4 -12 139.65 94.304 2
 1 4 -12 104.979 123.075 2
 -1 4 -11 2752.68 396.417 2
 1 4 -11 2083.04 352.523 2
 -1 4 -10 7297.74 617.299 2
 1 4 -10 7084.23 639.253 2
 1 4 -9 3267.91 425.045 2
 -1 4 -9 5150.36 526.875 2
 1 4 -8 14468.9 868.217 2
 -1 4 -8 13661.9 775.612 2
 1 4 -7 2558.31 346.907 2
 -1 4 -7 2584.65 329.289 2
 -1 4 -6 442.122 139.156 2
 1 4 -6 189.943 130.637 2
 1 4 -5 4286.06 434.005 2
 -1 4 -5 4991.59 421.371 2
 -1 4 -4 6863.14 476.608 2
 1 4 -4 6406.23 508.294 2
 -1 -4 -3 14142.7 602.687 1
 -1 4 -3 16223.7 710.375 2
 1 4 -3 14651.2 756.724 2
 1 4 -2 967.805 199.293 2
 1 -4 -2 921.896 112.542 1
 -1 4 -2 1134.82 178.973 2
 -1 -4 -2 962.378 157.035 1
 1 -4 -1 6627.32 300.477 1
 -1 -4 -1 6689.29 417.098 1
 1 -4 0 22547.9 589.103 1
 -1 -4 0 21759.8 761.946 1
 1 4 2 960.355 166.021 1
 -1 4 3 15264.8 502.944 1
 1 4 3 14661.3 657.865 1
 1 4 4 6290.98 447.58 1
 1 -4 4 5206.81 406.519 2
 -1 4 4 6529.55 351.534 1
 1 4 5 3898.8 368.867 1
 -1 4 5 3714 295.254 1
 -1 4 6 294.266 92.9669 1
 1 5 -23 426.641 267.54 2
 -1 5 -23 227.369 133.917 2
 1 5 -22 87.451 79.4329 2
 -1 5 -22 -281.252 188.975 2
 1 5 -21 55.8745 171.639 2
 -1 5 -21 326.631 219.957 2
 -1 5 -20 265.652 205.612 2
 1 5 -20 133.648 142.666 2
 1 5 -19 171.671 191.91 2
 -1 5 -19 422.114 226.446 2
 1 5 -18 814.007 284.895 2
 -1 5 -18 1041.3 319.52 2
 1 5 -17 1038.65 315.584 2
 -1 5 -17 879.394 275.338 2
 1 5 -16 957.965 311.351 2
 -1 5 -16 812.206 258.272 2
 1 5 -15 523.556 235.841 2
 -1 5 -15 1187.28 314.783 2
 -1 5 -14 213.022 113.716 2
 1 5 -14 296.627 185.282 2
 -1 5 -13 392.233 180.936 2
 1 5 -13 452.658 211.337 2
 -1 5 -12 2324.82 389.061 2
 1 5 -12 2349.66 413.593 2
 -1 5 -11 2366.39 374.178 2
 1 5 -11 2247.13 391.076 2
 1 5 -10 221.91 159.878 2
 -1 5 -10 299.439 130.128 2
 -1 5 -9 2472.93 387.505 2
 1 5 -9 1408.41 287.372 2
 1 5 -8 1551.92 315.969 2
 -1 5 -8 884.311 219 2
 -1 5 -7 9417.43 664.786 2
 1 5 -7 10833.6 762.696 2
 1 5 -6 4226.15 472.993 2
 -1 5 -6 4744.09 460.664 2
 1 5 -5 14708.5 860.47 2
 -1 5 -5 14226.9 781.223 2
 -1 5 -4 1441.6 239.629 2
 -1 -5 -4 1354.47 213.62 1
 1 5 -4 1562.44 271.102 2
 -1 -5 -3 3595.2 333.165 1
 -1 5 -3 4883.08 437.423 2
 1 5 -3 4534.84 460.291 2
 -1 5 -2 22494.8 907.718 2
 1 5 -2 23197.9 1013.34 2
 1 -5 -2 21112.1 615.477 1
 -1 -5 -2 22161.7 820.12 1
 -1 -5 -1 10823 578.293 1
 1 -5 -1 9941.17 426.546 1
 1 -5 0 1968.43 204 1
 -1 -5 0 2124.57 263.001 1
 -1 -5 1 10691.1 606.915 1
 -1 5 3 3901.8 274.191 1
 1 5 3 3689.19 359.045 1
 -1 5 4 1604.88 186.171 1
 -1 5 5 12685.1 560.146 1
 -1 5 6 3666.27 329.543 1
 -1 5 7 9308.61 555.717 1
 -1 6 -22 962.371 338.459 2
 1 6 -22 446.781 246.472 2
 -1 6 -21 1106.13 356.416 2
 1 6 -21 882.549 328.347 2
 -1 6 -20 528.492 242.4 2
 1 6 -20 97.681 167.23 2
 1 6 -19 429.333 252.1 2
 -1 6 -19 -15.6813 77.0932 2
 -1 6 -18 204.128 165.071 2
 1 6 -18 128.085 149.666 2
 1 6 -17 105.345 130.245 2
 -1 6 -17 135.433 193.859 2
 1 6 -16 116.163 158.575 2
 -1 6 -16 215.357 122.544 2
 1 6 -15 961.466 321.165 2
 -1 6 -15 1029.13 286.289 2
 -1 6 -14 2722.81 452.608 2
 1 6 -14 2868.07 490.15 2
 1 6 -13 -35.0929 142.21 2
 -1 6 -13 211.124 130.383 2
 1 6 -12 152.616 136.035 2
 -1 6 -12 352.064 181.824 2
 -1 6 -11 1972.91 362.984 2
 1 6 -11 1760.29 368.932 2
 -1 6 -10 6636.09 638.848 2
 1 6 -10 6634.76 689.089 2
 -1 6 -9 8765.06 734.205 2
 1 6 -9 6509.07 658.263 2
 1 6 -8 4638.44 554.369 2
 -1 6 -8 3690.49 455.671 2
 1 6 -7 4557.34 535.773 2
 -1 6 -7 4179.91 476.233 2
 1 6 -6 3155.83 439.304 2
 -1 6 -6 2652.42 376.922 2
 -1 6 -5 1314.44 267.458 2
 1 6 -5 1224.2 268.469 2
 -1 -6 -4 4094.6 382.47 1
 1 6 -4 4606.36 510.578 2
 -1 6 -4 3850.92 430.448 2
 -1 -6 -3 3716.1 360.595 1
 1 6 -3 3858.65 464.069 2
 -1 6 -3 3683.39 425.513 2
 1 -6 -2 10762.6 486.856 1
 -1 -6 -2 10742.8 616.269 1
 -1 6 -2 11609.2 720.664 2
 1 6 -2 12174.8 805.216 2
 1 6 -1 8201.18 639.428 2
 -1 -6 -1 8066.57 536.191 1
 1 -6 -1 7852.93 427.978 1
 -1 -6 0 3217.6 350.026 1
 1 -6 0 2992.4 271.222 1
 1 -6 1 7852 471.949 1
 -1 -6 1 8323.79 573.033 1
 -1 -6 2 12568.2 720.799 1
 -1 6 4 4090.28 320.98 1
 -1 6 5 1260.46 206.236 1
 -1 6 6 2602.63 290.958 1
 -1 6 7 3389.39 347.044 1
 1 7 -21 26.5111 121.114 2
 -1 7 -21 -113.376 135.109 2
 -1 7 -20 971.427 294.042 2
 1 7 -20 837.771 318.879 2
 1 7 -19 1093.62 352.113 2
 -1 7 -19 1073.34 339.764 2
 -1 7 -18 160.241 136.217 2
 1 7 -18 139.874 160.457 2
 -1 7 -17 518.471 244.905 2
 1 7 -17 -18.0945 87.6997 2
 1 7 -16 5183.64 743.41 2
 -1 7 -16 5310.38 699.309 2
 -1 7 -15 3452.25 556.864 2
 1 7 -15 3397.2 564.74 2
 1 7 -14 7546.94 830.381 2
 -1 7 -14 7085.55 769.604 2
 1 7 -13 1253.72 328.605 2
 -1 7 -13 1108.81 305.593 2
 -1 7 -12 338.437 148.449 2
 1 7 -12 886.211 285.719 2
 -1 7 -11 2932.28 465.996 2
 1 7 -11 2852.54 484.486 2
 1 7 -10 450.788 193.17 2
 -1 7 -10 549.848 193.959 2
 -1 7 -9 3696.74 510.761 2
 1 7 -9 3264.97 499.8 2
 1 7 -8 17243.3 1115.83 2
 -1 7 -8 14995.3 970.097 2
 1 7 -7 10785.4 874.579 2
 -1 7 -7 10664.4 811.533 2
 1 7 -6 423.914 205.718 2
 -1 7 -6 437.012 186.901 2
 -1 7 -5 1490.57 295.654 2
 1 7 -5 1118.14 268.295 2
 -1 -7 -4 5787.54 481.589 1
 1 7 -4 6728.57 673.706 2
 -1 7 -4 6678.3 614.879 2
 1 7 -3 841.991 239.403 2
 -1 -7 -3 582.268 162.176 1
 -1 7 -3 776.603 207.16 2
 1 7 -2 4416.84 537.768 2
 1 -7 -2 3731.9 315.862 1
 -1 -7 -2 3776.44 390.405 1
 -1 7 -2 4121.16 473.084 2
 -1 7 -1 2004.66 331.296 2
 -1 -7 -1 1709.42 271.287 1
 1 -7 -1 1703.85 222.552 1
 1 7 -1 2059.74 354.253 2
 -1 -7 0 9697.15 649.887 1
 1 -7 0 8578.04 512.606 1
 1 -7 1 1801.09 253.436 1
 -1 -7 1 1943.68 295.856 1
 1 -7 2 4045.59 381.269 1
 -1 -7 2 3980.57 439.175 1
 -1 7 6 341.855 110.815 1
 1 8 -20 1149.91 388.867 2
 -1 8 -20 966.275 311.463 2
 1 8 -19 652.089 276.507 2
 -1 8 -19 503.729 236.096 2
 -1 8 -18 73.5289 89.3664 2
 1 8 -18 504.27 253.483 2
 -1 8 -17 1048.73 339.981 2
 1 8 -17 999.563 349.656 2
 1 8 -16 1897.46 459.969 2
 -1 8 -16 2214.56 468.343 2
 -1 8 -15 1408.59 375.011 2
 1 8 -15 1211.85 358.387 2
 1 8 -14 3115.33 551.052 2
 -1 8 -14 3128.53 537.301 2
 -1 8 -13 931.499 252.391 2
 1 8 -13 794.086 329.826 2
 -1 8 -12 107.97 113.752 2
 1 8 -12 319.524 188.649 2
 -1 8 -11 -157.784 110.479 2
 1 8 -11 43.8143 86.8635 2
 -1 8 -10 1409.63 335.861 2
 1 8 -10 1467.01 358.433 2
 -1 8 -9 774.619 269.76 2
 1 8 -9 945.047 266.927 2
 -1 8 -8 6912.34 701.581 2
 1 8 -8 8782.96 858.225 2
 1 8 -7 4168.84 581.226 2
 -1 8 -7 3441.8 495.748 2
 -1 8 -6 65.906 81.5922 2
 1 8 -6 840.702 271.282 2
 1 8 -5 8818.44 817.425 2
 -1 8 -5 8747.28 768.062 2
 -1 -8 -4 3756.26 409.282 1
 1 8 -4 3854.02 540.651 2
 -1 8 -4 4236.59 530.735 2
 -1 -8 -3 1234.26 234.902 1
 1 8 -3 1543.21 338.051 2
 -1 8 -3 1604.58 328.393 2
 -1 -8 -2 5820.82 521.595 1
 -1 8 -2 7078.66 672.865 2
 1 -8 -2 5352.85 404.407 1
 1 8 -2 6135.9 668.462 2
 1 -8 -1 811.241 172.642 1
 -1 -8 -1 883.442 207.25 1
 1 8 -1 931.995 267.693 2
 -1 8 -1 1483.98 312.314 2
 1 -8 0 368.848 121.706 1
 -1 -8 0 621.918 171.789 1
 -1 -8 1 914.806 224.917 1
 1 -8 1 1450.27 247.975 1
 -1 -8 2 6085.99 572.239 1
 1 -8 2 6320.62 510.982 1
 -1 -8 3 1572.62 299.409 1
 1 -8 3 1661.58 281.438 1
 -1 9 -18 75.849 121 2
 1 9 -18 564.603 296.806 2
 1 9 -17 366.064 250.301 2
 -1 9 -17 -68.416 82.3345 2
 -1 9 -16 39.3853 100.334 2
 1 9 -16 128.192 154.507 2
 1 9 -15 -26.5358 124.752 2
 -1 9 -15 149.989 130.588 2
 1 9 -14 1959.9 472.734 2
 -1 9 -14 1384.41 375.889 2
 1 9 -13 840.235 323.409 2
 -1 9 -13 1020.46 307.085 2
 1 9 -12 1131.6 364.148 2
 -1 9 -12 944.702 319.609 2
 1 9 -11 1724.43 423.089 2
 -1 9 -11 1673.03 404.978 2
 -1 9 -10 195.045 159.632 2
 1 9 -10 493.852 267.75 2
 -1 9 -9 685.5 252.781 2
 1 9 -9 141.581 163.722 2
 -1 9 -8 379.365 199.249 2
 1 9 -8 469.489 240.076 2
 -1 9 -7 350.258 196.027 2
 1 9 -7 295.393 131.772 2
 -1 9 -6 1246.96 320.597 2
 1 9 -6 1351.82 362.406 2
 1 9 -5 1119.34 326.637 2
 -1 9 -5 1056.57 305.638 2
 1 9 -4 1082.56 303.679 2
 -1 9 -4 1190.9 293.122 2
 -1 -9 -3 1420.83 263.878 1
 1 9 -3 1560.83 366.207 2
 -1 9 -3 1631.61 363.411 2
 -1 -9 -2 3475.03 420.701 1
 -1 9 -2 3909.26 542.956 2
 1 9 -2 4300.77 609.191 2
 -1 -9 -1 590.656 191.077 1
 1 -9 -1 343.932 110.562 1
 1 9 -1 665.78 275.673 2
 1 9 0 139.019 137.27 2
 -1 9 0 -10.7764 136.517 2
 1 -9 0 13.6228 43.8608 1
 -1 -9 0 127.207 92.3773 1
 1 -9 1 950.47 210.274 1
 -1 -9 1 554.268 190.328 1
 -1 -9 2 3521.37 464.129 1
 1 -9 2 2093.86 306.732 1
 -1 -9 3 1579.38 329.511 1
 1 -9 3 774.289 200.471 1
 1 -9 4 674.325 192.016 1
 -1 -9 4 998.372 265.679 1
 -1 -9 5 977.28 261.747 1
 1 10 -16 1780.68 461.772 2
 -1 10 -16 1974.7 467.239 2
 -1 10 -15 378.707 230.68 2
 1 10 -15 371.835 221.646 2
 1 10 -14 73.247 125.868 2
 -1 10 -14 141.425 117.159 2
 -1 10 -13 -57.3523 109.532 2
 1 10 -13 308.143 208.638 2
 -1 10 -12 221.541 168.964 2
 1 10 -12 -183.45 169.448 2
 -1 10 -11 183.906 188.837 2
 1 10 -11 166.157 158.282 2
 -1 10 -10 725.069 274.616 2
 1 10 -10 1360.5 387.86 2
 -1 10 -9 475.398 241.442 2
 1 10 -9 70.945 146.075 2
 -1 10 -8 274.078 183.313 2
 1 10 -8 139.864 133.41 2
 1 10 -7 554.231 225.335 2
 -1 10 -7 602.553 239.362 2
 -1 10 -6 1400.11 360.845 2
 1 10 -6 1643.9 418.127 2
 1 10 -5 465.846 237.152 2
 -1 10 -5 316.542 179.991 2
 1 10 -4 -114.721 168.291 2
 -1 10 -4 25.7295 110.866 2
 -1 -10 -3 502.708 173.657 1
 -1 10 -3 1010.17 323.319 2
 1 10 -3 1126.64 336.2 2
 -1 -10 -2 383.964 189.679 1
 -1 10 -2 630.037 243.59 2
 1 10 -2 885.907 292.562 2
 -1 -10 -1 157.95 91.006 1
 1 10 -1 300.139 228.045 2
 -1 10 0 705.013 260.449 2
 1 10 0 862.023 304.783 2
 -1 -10 0 277.404 147.184 1
 -1 -10 1 249.716 128.316 1
 1 10 1 634.629 274.844 2
 -1 -10 2 457.735 174.686 1
 -1 -10 3 472.477 198.602 1
 -1 -10 4 154.654 127.484 1
 -1 -10 5 258.246 133.009 1
 -1 -10 6 1525.11 360.84 1
 -1 11 -14 1483.19 412.829 2
 1 11 -14 1956.95 515.64 2
 1 11 -13 -53.3372 111.933 2
 -1 11 -13 49.4207 93.3827 2
 1 11 -12 -21.2287 173.007 2
 -1 11 -12 -61.5668 122.601 2
 1 11 -11 971.203 366.517 2
 -1 11 -11 803.205 288.054 2
 -1 11 -10 773.327 298.075 2
 1 11 -10 1040.18 400.688 2
 1 11 -9 1120.52 362.601 2
 -1 11 -9 1118.47 336.404 2
 1 11 -8 1042.48 352.876 2
 -1 11 -8 599.127 257.599 2
 1 11 -7 320.058 184.141 2
 -1 11 -7 260.865 141.991 2
 1 11 -6 776.116 307.672 2
 -1 11 -6 864.601 324.629 2
 1 11 -5 1120.22 395.609 2
 -1 11 -5 1161.52 349.252 2
 -1 11 -4 925.148 312.174 2
 1 11 -4 1034.37 366.832 2
 1 11 -3 129.762 110.171 2
 -1 11 -3 1187.12 346.251 2
 1 11 -2 1023.02 377.181 2
 -1 11 -2 994.96 281.742 2
 -1 11 -1 137.801 142.951 2
 1 11 -1 9.69278 121.075 2
 1 11 0 2746.14 556.826 2
 -1 11 0 1653.56 408.644 2
 1 11 1 77.4808 116.16 2
 -1 11 1 350.373 195.842 2
 1 12 -11 -61.7748 93.2403 2
 -1 12 -11 882.961 327.962 2
 1 12 -10 400.643 219.103 2
 -1 12 -10 500.202 272.915 2
 -1 12 -9 239.11 194.392 2
 1 12 -9 239.249 185.083 2
 1 12 -8 2412.63 556.277 2
 -1 12 -8 2143.03 482.882 2
 -1 12 -7 -7.96803 114.219 2
 1 12 -7 49.8204 101.929 2
 1 12 -6 674.673 311.059 2
 -1 12 -6 92.0992 156.897 2
 -1 12 -5 267.967 276.062 2
 1 12 -5 -64.8451 173.757 2
 1 12 -4 1480.15 426.139 2
 -1 12 -4 1543.2 411.689 2
 1 12 -3 1261.99 400.328 2
 -1 12 -3 1823.25 457.878 2
 1 12 -2 1061.48 365.341 2
 -1 12 -2 1345.94 379.437 2
 1 12 -1 239.259 211.066 2
 -1 12 -1 308.101 209.952 2
 1 12 0 45.2415 94.7724 2
 -1 12 0 225.386 170.035 2
 -1 12 1 266.906 167.394 2
 1 12 1 -35.4791 98.4016 2
 -1 12 2 1392.56 394.701 2
 1 12 2 1148.33 482.317 2
 1 12 3 1241.06 400.334 2
 -1 13 -5 -20.3624 131.554 2
 1 13 -5 431.5 260.731 2
 1 13 -4 815.067 351.116 2
 -1 13 -4 1410.49 430.374 2
 -1 13 -3 937.142 339.609 2
 1 13 -3 595.469 309.942 2
 -1 13 -2 742.629 302.789 2
 1 13 -2 522.277 270.334 2
 1 13 -1 272.363 247.92 2
 -1 13 -1 200.048 162.405 2
 1 13 0 209.037 215.902 2
 -1 13 0 224.805 188.682 2
 -1 13 1 140.884 182.734 2
 1 13 1 200.597 187.847 2
 -1 13 2 909.155 332.46 2
 1 13 2 828.438 377.333 2
 -1 13 3 526.653 283.918 2
 1 13 3 512.262 289.116 2
 1 13 4 1084.95 381.525 2
 -1 13 4 1072.86 364.084 2
 2 0 -25 494.683 287.774 2
 2 0 -24 1140.58 357.196 2
 2 0 -23 3603.04 642.496 2
 2 0 -22 2610.24 536.992 2
 2 0 -21 232.229 193.812 2
 2 0 -20 4847.9 696.875 2
 2 0 -19 4713.58 662.493 2
 -2 0 -19 5551.58 720.693 2
 -2 0 -18 2368.16 460.915 2
 2 0 -18 1485.04 369.499 2
 2 0 -17 6041.74 703.782 2
 -2 0 -17 7016.43 728.146 2
 2 0 -16 2937.29 473.713 2
 -2 0 -16 2916.62 465.735 2
 2 0 -15 2703.11 445.353 2
 -2 0 -15 3347.63 474.284 2
 2 0 -14 19944.3 1163.94 2
 -2 0 -14 24721.7 1221.74 2
 2 0 -13 7747.76 700.018 2
 -2 0 -13 8144.77 682.163 2
 2 0 -12 18205 1022.74 2
 -2 0 -12 19370.1 990.357 2
 2 0 -11 8060.5 660.927 2
 -2 0 -11 7877.11 607.925 2
 2 0 -10 1586.24 291.252 2
 -2 0 -10 1848.47 286.433 2
 2 0 -9 22037.1 991.71 2
 -2 0 -9 21379.3 903.016 2
 2 0 -8 5002.42 445.911 2
 -2 0 -8 4546.35 388.058 2
 2 0 -7 35169.9 1106.23 2
 -2 0 -7 33966.7 999.302 2
 2 0 -6 33064 1010.06 2
 -2 0 -6 33686.7 917.052 2
 2 0 -5 70581.3 1401.32 2
 -2 0 -5 54043.8 1067.69 2
 2 0 -4 89543.1 1444.32 2
 2 0 -3 27296.7 713.671 2
 2 0 -2 4775.78 262.488 2
 -2 0 -1 171327 1449.03 1
 2 0 -1 174621 1350.15 2
 2 0 0 527.753 67.5489 2
 -2 0 0 482.241 80.18 1
 2 0 0 433.635 76.4839 1
 2 0 1 168643 1508.85 1
 -2 0 1 170228 1382.06 2
 -2 0 2 4711.04 270.403 2
 2 0 2 5141.96 291.462 1
 -2 0 3 26161.4 723.971 2
 2 0 3 27263.8 622.218 2
 -2 0 4 88985.9 1495.69 2
 2 0 4 89700.9 1284.37 2
 2 0 5 52828.8 1121.11 2
 -2 0 5 55504.8 1307.77 2
 2 0 6 32848.6 983.797 2
 -2 0 6 34088.9 1112.47 2
 2 0 7 34953 1122.21 2
 2 1 -25 1229.56 387.98 2
 2 -1 -24 1087.2 383.792 2
 2 1 -24 1729.23 449.968 2
 -2 1 -23 717.142 278.843 2
 2 -1 -23 703.588 309.49 2
 2 1 -23 74.0313 185.606 2
 2 1 -22 926.254 298.488 2
 -2 1 -22 1630.22 426.275 2
 2 -1 -22 1296.41 393.452 2
 -2 1 -21 971.46 337.77 2
 2 1 -21 570.323 243.76 2
 2 -1 -21 1203.34 383.435 2
 2 -1 -20 1002.27 344.999 2
 2 1 -20 1258.01 348.811 2
 -2 1 -20 930.246 295.137 2
 -2 1 -19 1128.79 303.989 2
 2 1 -19 718.84 264.055 2
 2 -1 -19 962.565 316.717 2
 2 1 -18 2392.72 479.507 2
 -2 1 -18 2767.97 485.841 2
 2 -1 -18 2733.49 495.031 2
 -2 1 -17 4124.9 559.968 2
 2 1 -17 3754.66 567.968 2
 2 -1 -17 4669.56 620.199 2
 2 1 -16 1464.69 374.85 2
 -2 1 -16 2014.17 372.084 2
 2 -1 -16 2380.76 433.692 2
 -2 1 -15 217.271 128.263 2
 2 1 -15 286.559 146.425 2
 2 -1 -15 340.142 177.545 2
 2 -1 -14 2134.26 386.292 2
 -2 1 -14 1476.39 311.853 2
 2 1 -14 2188.39 412.029 2
 -2 1 -13 4854.53 511.357 2
 2 1 -13 5555 596.413 2
 2 -1 -13 4429.36 523.304 2
 2 -1 -12 5823.3 570.372 2
 2 1 -12 5069.36 545.177 2
 -2 1 -12 6329.6 572.338 2
 2 1 -11 4890.81 528.855 2
 2 -1 -11 4237.74 497.304 2
 -2 1 -11 4330.09 442.874 2
 -2 1 -10 6917.54 526.371 2
 2 1 -10 7893.98 623.56 2
 2 -1 -10 6721.78 566.693 2
 2 1 -9 2187.05 316.124 2
 -2 1 -9 2664.64 310.511 2
 2 -1 -9 2363.25 323.482 2
 2 -1 -8 11198.4 665.393 2
 -2 1 -8 11559.4 612.191 2
 2 1 -8 12278 723.621 2
 2 1 -7 18986 862.76 2
 -2 1 -7 17992.2 715.423 2
 2 -1 -7 17756.3 781.866 2
 -2 1 -6 33697.1 895.433 2
 2 -1 -6 32936 1002.56 2
 2 1 -6 35323.2 1083.61 2
 2 1 -5 11217.4 578.128 2
 2 -1 -5 9306.33 493.569 2
 -2 1 -5 8855.67 414.894 2
 -2 1 -4 15522.8 482.427 2
 2 1 -4 14927.9 623.841 2
 2 -1 -4 15060.9 574.585 2
 2 -1 -3 11434.5 452.654 2
 2 1 -3 10463.5 487.066 2
 -2 1 -3 10355.2 331.762 2
 2 -1 -2 10058.4 354.545 2
 2 1 -2 9235.29 429.551 2
 -2 -1 -2 8457.07 385.145 1
 2 -1 -1 102488 889.875 2
 2 1 -1 98268.2 1288.48 2
 -2 -1 -1 95128.9 1261.72 1
 -2 -1 0 33346.8 737.674 1
 -2 1 0 35877.8 489.962 1
 2 1 0 32284.9 757.055 1
 2 -1 0 34342.3 501.8 1
 -2 -1 1 90787.6 1244.89 2
 2 1 1 94666.8 1324 1
 -2 1 1 99895.6 811.21 1
 -2 1 1 98559.5 914.058 2
 -2 -1 2 8678.32 417.37 2
 2 1 2 9066.33 431.821 1
 -2 1 2 9442.06 358.712 2
 -2 -1 3 9373.47 481.681 2
 -2 1 3 10514.4 446.254 2
 2 1 3 9171.91 458.556 1
 2 -1 3 10573.1 356.888 2
 2 -1 4 15203.9 510.466 2
 -2 -1 4 14499.7 643.048 2
 -2 1 4 15276.2 602.357 2
 -2 -1 5 11038 622.774 2
 -2 1 5 8373.6 499.452 2
 2 -1 5 8716.69 445.266 2
 2 -1 6 34250.5 989.361 2
 -2 1 6 32622.1 1082.71 2
 -2 -1 6 33942.1 1150.36 2
 2 1 6 34209.9 1055.05 2
 2 -1 7 17831.2 783.719 2
 -2 2 -25 399.272 219.283 2
 2 2 -25 717.171 286.856 2
 2 2 -24 534.709 257.318 2
 -2 2 -24 284.46 174.571 2
 2 2 -23 8.21659 127.927 2
 -2 2 -23 34.265 106.063 2
 -2 2 -22 160.009 169.983 2
 2 2 -22 -5.24137 91.117 2
 2 2 -21 251.88 115.524 2
 -2 2 -21 391.062 223.404 2
 -2 2 -20 454.018 227.799 2
 2 2 -20 686.372 280.5 2
 2 -2 -20 405.521 231.538 2
 2 2 -19 460.252 229.211 2
 -2 2 -19 594.33 194.983 2
 2 -2 -19 75.7668 125.274 2
 -2 2 -18 613.902 238.881 2
 2 2 -18 850.116 285.743 2
 2 -2 -18 629.711 250.567 2
 2 -2 -17 212.584 156.39 2
 -2 2 -17 133.404 115.121 2
 2 2 -17 238.626 180.491 2
 2 2 -16 983.292 292.044 2
 -2 2 -16 787.94 230.061 2
 2 -2 -16 479.918 205.2 2
 2 2 -15 219.851 145.879 2
 2 -2 -15 121.971 118.883 2
 -2 2 -15 418.414 176.613 2
 2 2 -14 3415.91 490.818 2
 2 -2 -14 2852.09 438.674 2
 -2 2 -14 3343.38 446.049 2
 2 2 -13 5387.08 597.376 2
 -2 2 -13 6066.58 583.914 2
 2 -2 -13 4997.78 574.494 2
 2 2 -12 5256.72 567.115 2
 -2 2 -12 6451.49 582.405 2
 2 -2 -12 5233.93 549.246 2
 2 2 -11 5882.92 604.908 2
 2 -2 -11 5489.28 556.807 2
 -2 2 -11 4564.86 471.258 2
 -2 2 -10 6933.77 551.692 2
 2 -2 -10 6732.47 582.14 2
 2 2 -10 7005.67 617.014 2
 -2 2 -9 9789.51 614.073 2
 2 -2 -9 9868.81 667.841 2
 2 2 -9 10647 731.967 2
 2 -2 -8 7951.68 563.729 2
 -2 2 -8 8514.19 530.11 2
 2 2 -8 9320.71 643.029 2
 -2 2 -7 32477.8 973.016 2
 2 -2 -7 35245.4 1123.29 2
 2 2 -7 32742.8 1151.38 2
 -2 2 -6 39683.4 1009.34 2
 2 2 -6 39411.6 1210.73 2
 2 -2 -6 40759.5 1131.17 2
 2 -2 -5 9821.17 523.265 2
 -2 2 -5 9286.72 448.292 2
 -2 2 -4 33591.2 759.365 2
 2 2 -4 32643.2 1012.68 2
 -2 -2 -3 735.417 133.291 1
 -2 2 -3 725.388 100.284 2
 2 2 -3 869.896 170.131 2
 2 2 -2 5956.43 396.248 2
 -2 2 -2 6134.9 252.811 2
 -2 -2 -2 4876.04 332.034 1
 -2 -2 -1 37700.8 894.442 1
 -2 2 -1 34694.3 534.246 2
 2 2 -1 35417.6 924.21 2
 -2 -2 0 1582.88 188.45 1
 2 2 1 37970.8 927.689 1
 2 -2 2 5608.52 237.096 2
 -2 2 2 5998.1 320.825 2
 -2 -2 2 5086.09 372.303 2
 2 2 2 5866.62 378.086 1
 -2 -2 3 869.356 163.451 2
 -2 2 3 756.341 135.909 2
 2 2 3 785.195 148.604 1
 2 -2 3 701.728 105.172 2
 -2 2 4 32778.1 921.687 2
 -2 -2 4 29591.5 1003.4 2
 2 2 4 33443.8 1002.4 1
 2 -2 4 34959.4 803.605 2
 2 2 5 9939.63 579.614 1
 2 -2 5 9289.51 466.644 2
 -2 2 5 9165.48 550.855 2
 -2 -2 5 10805.4 658.05 2
 2 -2 6 38824.5 1063.58 2
 2 -2 7 33462.3 1069.03 2
 -2 3 -24 36.4264 79.395 2
 2 3 -24 214.262 211.65 2
 -2 3 -23 674.81 296.723 2
 2 3 -23 743.977 345.075 2
 2 3 -22 658.57 247.891 2
 -2 3 -22 626.7 248.728 2
 -2 3 -21 371.314 209.839 2
 2 3 -21 9.33742 106.34 2
 -2 3 -20 1.69354 146.717 2
 2 3 -20 198.369 156.864 2
 2 3 -19 132.553 140.866 2
 -2 3 -19 155.584 108.502 2
 2 3 -18 163.803 138.642 2
 -2 3 -18 406.06 168.514 2
 2 3 -17 4235.4 617.414 2
 -2 3 -17 4948.9 619.422 2
 -2 3 -16 526.33 205.26 2
 2 3 -16 212.32 180.286 2
 2 3 -15 2819.94 473.915 2
 -2 3 -15 2969.43 447.284 2
 2 3 -14 2242.27 408.976 2
 -2 3 -14 2357.54 378.44 2
 2 3 -13 1214.44 289.619 2
 -2 3 -13 1030.31 254.123 2
 -2 3 -12 1961.79 328.811 2
 2 3 -12 1430.02 318.515 2
 2 3 -11 3043.88 484.014 2
 -2 3 -11 279.349 126.228 2
 -2 3 -10 31583 1179.32 2
 2 3 -10 32085.3 1349.34 2
 2 3 -9 5609.95 541.939 2
 -2 3 -9 5630.4 473.26 2
 -2 3 -8 13821.3 714.93 2
 2 3 -8 12807.8 794.55 2
 2 3 -7 5115.22 489.818 2
 -2 3 -7 5433.03 425.92 2
 2 3 -6 2564.23 330.87 2
 -2 3 -6 2962.1 294.26 2
 -2 3 -5 1774.61 216.25 2
 2 3 -5 2673.27 334.045 2
 2 3 -4 2232.67 298.984 2
 -2 3 -4 2338.12 231.503 2
 2 3 -3 2109.58 272.572 2
 -2 -3 -3 2121.35 240.9 1
 -2 3 -3 1908.91 194.569 2
 2 3 -2 47939 1260.13 2
 -2 3 -2 43848.5 875.951 2
 -2 -3 -2 45072.2 1089.51 1
 2 3 -1 1278.42 210.262 2
 -2 -3 -1 1630.58 224.159 1
 -2 -3 0 14524 627.695 1
 -2 -3 1 1510.22 211.587 1
 2 3 1 1441.82 203.386 1
 2 3 2 45316 1141.98 1
 2 3 3 2438.74 277.458 1
 2 -3 3 2029.4 192.901 2
 -2 3 4 2428.97 281.977 2
 2 3 4 2248.31 272.814 1
 2 -3 4 2132.29 224.625 2
 2 -3 5 1707.82 216.971 2
 -2 3 5 1963.02 272.105 2
 2 -3 6 2946.45 314.177 2
 2 -3 7 5044.92 440.796 2
 2 4 -24 1587.08 466.329 2
 -2 4 -24 1173.71 370.743 2
 -2 4 -23 1950.39 470.798 2
 2 4 -23 1794.56 494.177 2
 -2 4 -22 694.06 270.812 2
 2 4 -22 1208.67 369.668 2
 -2 4 -21 366.96 201.747 2
 2 4 -21 1046 358.46 2
 2 4 -20 702.427 309.505 2
 -2 4 -20 674.792 275.044 2
 -2 4 -19 2502.53 469.8 2
 2 4 -19 3288.29 583.411 2
 2 4 -18 3786.7 603.766 2
 -2 4 -18 3565.98 543.964 2
 2 4 -17 4569.5 656.021 2
 -2 4 -17 5185.62 633.56 2
 2 4 -16 1561.49 365.732 2
 -2 4 -16 1831.7 379.4 2
 2 4 -15 512.715 213.518 2
 -2 4 -15 537.661 208.003 2
 2 4 -14 10884.9 943.875 2
 -2 4 -14 9813.25 794.481 2
 -2 4 -13 4151.14 490.028 2
 2 4 -13 4392.98 579.717 2
 2 4 -12 6082.83 657.527 2
 -2 4 -12 5222.06 535.21 2
 2 4 -11 545.364 226.32 2
 -2 4 -11 391.994 172.619 2
 -2 4 -10 1734.68 296.648 2
 2 4 -10 1522.93 315.598 2
 -2 4 -9 5107.94 477.308 2
 2 4 -9 4615.29 520.853 2
 2 4 -8 8662.72 689.651 2
 -2 4 -8 8776.42 591.266 2
 2 4 -7 17801.3 953.666 2
 -2 4 -7 18674.1 828.399 2
 -2 4 -6 8071.57 527.709 2
 2 4 -6 7372.34 608.084 2
 2 4 -5 2708.41 395.025 2
 -2 4 -5 745.35 148.908 2
 -2 4 -4 20699.2 774.488 2
 -2 -4 -4 17084.1 741.066 1
 2 4 -4 20218.3 941.242 2
 -2 -4 -3 5128.31 414.973 1
 -2 4 -3 5127.06 370.514 2
 2 4 -3 5184.22 474.685 2
 -2 4 -2 5447.03 373.337 2
 -2 -4 -2 4873.01 399.046 1
 2 4 -2 5730.33 477.91 2
 -2 -4 -1 26958.9 928.682 1
 2 4 -1 22423.7 912.318 2
 2 -4 0 1328.67 113.181 1
 -2 -4 0 1569.14 227.454 1
 -2 -4 1 26036.4 932.853 1
 2 4 2 4992.02 423.151 1
 -2 4 3 4461.47 203.619 1
 -2 4 4 19471.1 510.322 1
 -2 4 5 568.689 107.405 1
 2 -4 5 532.919 134.798 2
 2 -4 6 6868.23 510.729 2
 -2 5 -23 2455.34 517.721 2
 2 5 -23 2673.67 583.971 2
 -2 5 -22 1220.1 371.254 2
 2 5 -22 1644.25 452.816 2
 -2 5 -21 471.533 237.389 2
 2 5 -21 561.951 222.278 2
 2 5 -20 744.93 275.376 2
 -2 5 -20 456.261 227.596 2
 -2 5 -19 2255.19 466.733 2
 2 5 -19 1742.81 423.454 2
 2 5 -18 2287.54 489.898 2
 -2 5 -18 2797.16 499.349 2
 -2 5 -17 3313.73 514.868 2
 2 5 -17 3307.74 561.289 2
 -2 5 -16 3463.17 511.705 2
 2 5 -16 3511.1 588.849 2
 -2 5 -15 3529.55 507.579 2
 2 5 -15 4195.39 625.838 2
 2 5 -14 3973.1 588.565 2
 -2 5 -14 3627.52 506.468 2
 2 5 -13 3000.43 490.001 2
 -2 5 -13 3172.19 461.071 2
 2 5 -12 5377.04 632.694 2
 -2 5 -12 5656.68 591.618 2
 -2 5 -11 1832.05 325.078 2
 2 5 -11 2680.66 447.438 2
 2 5 -10 1559.21 341.816 2
 -2 5 -10 1704.14 295.548 2
 -2 5 -9 617.673 170.479 2
 2 5 -9 1205.51 295.653 2
 -2 5 -8 4716.07 463.29 2
 2 5 -8 5327.06 581.007 2
 -2 5 -7 13948.7 772.991 2
 2 5 -7 12393.5 860.077 2
 -2 5 -6 16118.3 801.486 2
 2 5 -6 16731.5 977.016 2
 -2 5 -5 7112.83 524.021 2
 2 5 -5 10228.8 758.841 2
 -2 5 -4 3401.66 353.283 2
 -2 -5 -4 3337.51 353.133 1
 2 5 -4 4013.21 468.518 2
 -2 5 -3 8873.86 552.139 2
 -2 -5 -3 8628.3 571.241 1
 2 5 -3 8584.91 665.763 2
 2 5 -2 13880.3 819.042 2
 -2 -5 -2 14189.8 715.967 1
 -2 5 -2 13543.6 667.99 2
 -2 -5 -1 4066.67 395.036 1
 2 5 -1 3715.84 412.962 2
 2 -5 -1 2856.18 182.022 1
 -2 -5 0 11042.5 640.269 1
 2 -5 0 11080.5 398.883 1
 -2 -5 1 3690.25 385.268 1
 -2 5 4 3640.29 232.774 1
 -2 5 5 6230.9 341.047 1
 -2 5 6 15722.9 604.861 1
 -2 5 7 11239.1 555.695 1
 2 6 -22 617.714 294.952 2
 -2 6 -22 548.169 272.646 2
 2 6 -21 875.155 338.842 2
 -2 6 -21 883.526 298.907 2
 -2 6 -20 -38.4735 163.193 2
 2 6 -20 51.7941 83.3865 2
 -2 6 -19 922.593 306.813 2
 2 6 -19 1382.43 392.735 2
 2 6 -18 1691.21 422.066 2
 -2 6 -18 1647.49 389.158 2
 -2 6 -17 1881.6 398.146 2
 2 6 -17 1843.54 431.5 2
 -2 6 -16 2304.3 429.476 2
 2 6 -16 3218.7 576.291 2
 -2 6 -15 1545.4 348.64 2
 2 6 -15 1489.91 368.548 2
 -2 6 -14 3191.31 497.761 2
 2 6 -14 3308.1 538.98 2
 -2 6 -13 2278.24 414.849 2
 2 6 -13 2320.14 479.302 2
 -2 6 -12 1017.07 293.532 2
 2 6 -12 777.876 261.921 2
 -2 6 -11 6926.28 650.118 2
 2 6 -11 7657.33 782.658 2
 2 6 -10 5313.48 632.511 2
 -2 6 -10 5002.51 539.029 2
 -2 6 -9 316.577 143.568 2
 2 6 -9 56.4079 89.9216 2
 -2 6 -8 1619.9 299.797 2
 2 6 -8 1713.25 347.352 2
 -2 6 -7 3965.05 441.82 2
 2 6 -7 3507.54 483.709 2
 -2 6 -6 6097.39 542.395 2
 2 6 -6 5705.31 609.823 2
 2 6 -5 715.46 216.971 2
 -2 6 -5 357.045 120.664 2
 -2 -6 -4 301.733 116.239 1
 -2 6 -4 593.225 165.849 2
 2 6 -4 476.074 179.822 2
 2 6 -3 3155.4 442.969 2
 -2 -6 -3 2571.13 327.696 1
 -2 6 -3 2555.06 330.107 2
 -2 6 -2 1452.79 248.904 2
 2 6 -2 1645.39 317.252 2
 -2 -6 -2 1520.75 259.89 1
 2 6 -1 6337.71 583.209 2
 2 -6 -1 5650.93 301.88 1
 -2 -6 -1 6615.92 528.423 1
 2 -6 0 481.606 108.034 1
 -2 -6 0 618.769 175.148 1
 2 -6 1 6284 371.833 1
 -2 -6 1 6516.66 543.49 1
 -2 -6 2 1616.97 279.217 1
 -2 6 5 284.129 77.8693 1
 -2 6 6 4421.77 328.388 1
 -2 6 7 2931.54 287.075 1
 -2 6 8 1551.64 228.075 1
 2 7 -21 -334.193 219.001 2
 -2 7 -21 35.1868 97.5269 2
 -2 7 -20 155.405 73.8257 2
 2 7 -20 137.811 164.043 2
 -2 7 -19 261.299 182.235 2
 2 7 -19 469.636 228.845 2
 2 7 -18 467.274 240.378 2
 -2 7 -18 464.948 200.426 2
 2 7 -17 1279.21 386.293 2
 -2 7 -17 925.427 292.805 2
 2 7 -16 34.5226 95.6204 2
 -2 7 -16 348.831 176.121 2
 -2 7 -15 880.69 264.031 2
 2 7 -15 1046.4 339.475 2
 2 7 -14 538.41 249.259 2
 -2 7 -14 517.393 218.152 2
 -2 7 -13 1482.69 335.208 2
 2 7 -13 1210.84 334.251 2
 2 7 -12 307.964 184.444 2
 -2 7 -12 579.056 225.611 2
 2 7 -11 1285.06 377.905 2
 -2 7 -11 1126.15 276.934 2
 2 7 -10 1912.08 406.884 2
 -2 7 -10 2282.25 379.162 2
 2 7 -9 493.573 219.872 2
 -2 7 -9 597.523 198.564 2
 2 7 -8 2205.76 428.633 2
 -2 7 -8 1978.89 342.793 2
 2 7 -7 422.64 205.08 2
 -2 7 -7 418.018 136.361 2
 2 7 -6 840.112 252.133 2
 -2 7 -6 1197.11 293.851 2
 -2 7 -5 1413.08 289.007 2
 2 7 -5 2507.14 431.301 2
 2 7 -4 43.698 80.7929 2
 -2 7 -4 403.521 180.451 2
 -2 -7 -4 380.568 137.158 1
 -2 -7 -3 99.3236 84.9863 1
 -2 7 -3 117.223 115.892 2
 -2 7 -2 763.983 202.066 2
 2 7 -2 844.668 259.82 2
 -2 -7 -2 645.473 180.241 1
 -2 -7 -1 633.522 173.313 1
 -2 7 -1 492.078 165.29 2
 2 7 -1 808.47 243.55 2
 2 -7 -1 464.051 100.763 1
 -2 -7 0 5497.48 527.288 1
 2 -7 0 4389.48 316.142 1
 -2 -7 1 679.112 171.208 1
 2 -7 1 536.722 117.667 1
 -2 -7 2 840.652 215.372 1
 -2 -7 3 514.975 191.532 1
 -2 7 6 433.14 106.409 1
 -2 7 7 412.581 116.568 1
 -2 7 8 1693.32 252.007 1
 2 8 -20 157.367 180.284 2
 -2 8 -20 381.008 195.969 2
 2 8 -19 793.877 315.113 2
 -2 8 -19 414.912 203.641 2
 -2 8 -18 292.016 178.671 2
 2 8 -18 -59.9211 128.549 2
 -2 8 -17 235.406 116.075 2
 2 8 -17 745.14 300.902 2
 2 8 -16 992.822 351.474 2
 -2 8 -16 600.166 226.157 2
 -2 8 -15 271.672 174.126 2
 2 8 -15 827.751 321.008 2
 -2 8 -14 2674.49 488.437 2
 2 8 -14 1998.8 457.063 2
 -2 8 -13 529.511 194.235 2
 2 8 -13 1468.88 402.676 2
 2 8 -12 1314.24 373.956 2
 -2 8 -12 861.098 271.084 2
 -2 8 -11 17.7867 88.1112 2
 2 8 -11 384.058 246.38 2
 -2 8 -10 1483.06 326.193 2
 2 8 -10 1719.64 410.855 2
 2 8 -9 673.699 241.609 2
 -2 8 -9 46.8381 83.1965 2
 2 8 -8 3477.76 550.335 2
 -2 8 -8 3718.4 502.367 2
 -2 8 -7 1871.35 354.062 2
 2 8 -7 2797.68 531.212 2
 -2 8 -6 7579.47 709.082 2
 2 8 -6 5461.92 684.651 2
 -2 8 -5 844.901 222.386 2
 2 8 -5 1481.85 357.162 2
 2 8 -4 2796.18 479.618 2
 -2 -8 -4 3310.97 406.831 1
 -2 8 -4 3661.35 485.887 2
 -2 -8 -3 2134.99 358.184 1
 -2 8 -3 1869.2 332.877 2
 2 8 -3 3058.24 533.014 2
 -2 8 -2 1187.48 273.455 2
 2 8 -2 1222.29 358.587 2
 -2 -8 -2 1103.08 246.325 1
 -2 -8 -1 674.377 209.858 1
 2 8 -1 602.473 198.707 2
 -2 8 -1 392.146 164.917 2
 2 -8 -1 291.173 87.7413 1
 2 -8 0 208.131 78.316 1
 -2 -8 0 113.409 93.8054 1
 2 -8 1 262.18 100.447 1
 -2 -8 1 660.387 197.983 1
 2 -8 2 1133.02 195.739 1
 -2 -8 2 1143.25 265.269 1
 -2 -8 3 3713.45 510.975 1
 -2 -8 4 3816.96 502.388 1
 -2 9 -18 1832.06 438.288 2
 2 9 -18 2358.9 557.135 2
 -2 9 -17 865.603 309.911 2
 2 9 -17 652.157 279.046 2
 -2 9 -16 2725.45 522.667 2
 2 9 -16 3231.24 620.969 2
 2 9 -15 354.203 154.368 2
 -2 9 -15 677.873 279.61 2
 2 9 -14 838.476 301.585 2
 -2 9 -14 462.614 209.043 2
 -2 9 -13 1836.7 422.365 2
 2 9 -13 1847.73 467.914 2
 2 9 -12 2139.59 489.336 2
 -2 9 -12 2069.53 427.349 2
 2 9 -11 311.798 191.012 2
 -2 9 -11 177.039 150.688 2
 -2 9 -10 2430.16 446.169 2
 2 9 -10 2310.49 481.582 2
 -2 9 -9 97.6959 136.067 2
 2 9 -9 -55.4531 95.5375 2
 2 9 -8 277.338 216.957 2
 -2 9 -8 445.707 193.395 2
 2 9 -7 836.674 299.373 2
 -2 9 -7 1076.85 289.195 2
 -2 9 -6 5306.17 638.539 2
 2 9 -6 5572.16 721.868 2
 2 9 -5 1709.96 389.482 2
 -2 9 -5 1430.31 318.742 2
 -2 9 -4 367.252 186.833 2
 2 9 -4 668.34 250.439 2
 -2 -9 -4 536.558 179.646 1
 -2 9 -3 1195.89 301.05 2
 2 9 -3 1513.99 394.255 2
 -2 -9 -3 1731.87 343.483 1
 -2 9 -2 1130.03 281.584 2
 -2 -9 -2 628.252 206.356 1
 2 9 -2 581.048 260.558 2
 2 9 -1 5885.68 728.594 2
 -2 -9 -1 5019.6 550.663 1
 -2 9 -1 4838.51 585.419 2
 -2 9 0 2512.29 404.846 2
 -2 -9 0 2358.63 394.417 1
 2 9 0 2524.14 461.765 2
 -2 -9 1 5809.89 611.286 1
 2 -9 2 623.406 156.912 1
 -2 -9 2 622.201 237.008 1
 -2 -9 3 1235.22 298.877 1
 2 -9 3 473.301 140.908 1
 2 -9 4 373.216 142.423 1
 -2 -9 4 600.923 213.959 1
 -2 -9 5 1479.35 328.246 1
 -2 10 -16 251.817 214.732 2
 2 10 -16 516.293 271.474 2
 -2 10 -15 1242.63 361.407 2
 2 10 -15 973.347 357.885 2
 2 10 -14 38.9846 115.038 2
 -2 10 -14 270.341 175.057 2
 -2 10 -13 2453.88 489.568 2
 2 10 -13 2299.23 523.567 2
 -2 10 -12 178.625 132.847 2
 2 10 -12 308.198 217.003 2
 2 10 -11 218.694 215.266 2
 -2 10 -11 497.991 222.408 2
 2 10 -10 1170.25 376.11 2
 -2 10 -10 1310.26 346.117 2
 2 10 -9 618.174 261.223 2
 -2 10 -9 408.353 222.483 2
 2 10 -8 932.987 326.05 2
 -2 10 -8 765.469 260.055 2
 -2 10 -7 2170.72 441.376 2
 2 10 -7 2024.02 477.038 2
 -2 10 -6 2513.21 462.24 2
 2 10 -6 2642.92 540.202 2
 2 10 -5 1172.2 354.531 2
 -2 10 -5 1163.92 321.547 2
 2 10 -4 1850.13 441.839 2
 -2 10 -4 1355.23 326.915 2
 -2 10 -3 82.609 126.978 2
 2 10 -3 457.557 254.255 2
 -2 -10 -3 212.49 139.048 1
 -2 10 -2 208.105 164.863 2
 2 10 -2 379.948 239.862 2
 -2 -10 -2 -18.3776 86.1642 1
 2 10 -1 6088.01 789.801 2
 -2 10 -1 5523.49 663.497 2
 -2 -10 0 194.185 128.596 1
 2 10 0 21.4513 122.688 2
 -2 10 0 -19.0277 95.9372 2
 2 10 1 5709.63 746.477 2
 -2 -10 1 3508.45 496.179 1
 -2 -10 2 403.359 182.268 1
 -2 -10 3 168.097 128.272 1
 -2 -10 4 1321.74 336.307 1
 -2 -10 5 875.636 294.474 1
 -2 -10 6 3428.97 558.374 1
 -2 -10 7 2039.79 416.059 1
 2 11 -14 507.287 269.561 2
 2 11 -13 629.967 333.636 2
 -2 11 -12 784.182 294.56 2
 2 11 -12 736.417 343.307 2
 -2 11 -11 337.44 194.653 2
 2 11 -11 808.477 317.666 2
 -2 11 -10 377.568 228.164 2
 2 11 -10 514.204 259.621 2
 -2 11 -9 821.421 302.404 2
 2 11 -9 737.814 304.492 2
 2 11 -8 408.918 218.527 2
 -2 11 -8 249.931 168.709 2
 -2 11 -7 603.496 259.53 2
 2 11 -7 1099.83 396.761 2
 2 11 -6 814.009 305.588 2
 -2 11 -6 451.198 200.409 2
 -2 11 -5 499.942 229.061 2
 2 11 -5 531.518 261.624 2
 2 11 -4 203.706 162.631 2
 -2 11 -4 230.192 188.562 2
 -2 11 -3 898.222 290.458 2
 2 11 -3 997.891 342.279 2
 -2 11 -2 -70.7017 136.198 2
 2 11 -2 195.029 171.066 2
 2 11 -1 331.756 215.06 2
 -2 11 -1 1010.42 303.245 2
 -2 11 0 946.197 308.133 2
 2 11 0 1135.98 371.682 2
 2 11 1 462.398 286.621 2
 -2 11 1 977.458 295.938 2
 2 11 2 60.4993 87.957 2
 -2 -11 3 659.912 247.78 1
 -2 -11 4 154.794 138.563 1
 -2 -11 5 250.625 183.012 1
 -2 -11 6 372.977 170.883 1
 -2 -11 7 1117.4 355.858 1
 -2 -11 8 -19.0478 174.962 1
 -2 -11 9 775.676 302.984 1
 2 12 -10 20.7958 91.6034 2
 2 12 -9 318.413 229.074 2
 2 12 -8 56.1547 198.834 2
 -2 12 -7 197.043 133.83 2
 2 12 -7 70.6009 123.991 2
 2 12 -6 157.019 199.345 2
 -2 12 -6 435.991 237.068 2
 -2 12 -5 420.899 217.187 2
 2 12 -5 390.48 259.17 2
 2 12 -4 502.691 259.153 2
 -2 12 -4 371.928 226.825 2
 -2 12 -3 52.2643 88.0962 2
 2 12 -3 386.279 225.618 2
 2 12 -2 204.689 215.304 2
 -2 12 -2 238.255 186.082 2
 -2 12 -1 32.6084 92.7399 2
 2 12 -1 49.8178 148.994 2
 -2 12 0 133.773 153.868 2
 2 12 0 19.5326 111.569 2
 2 12 1 212.891 199.837 2
 -2 12 1 -47.8554 99.7852 2
 -2 12 2 -56.0792 129.318 2
 2 12 2 417.321 311.079 2
 2 12 3 360.87 247.566 2
 2 13 -4 547.548 260.018 2
 2 13 -3 210.236 195.077 2
 2 13 -2 240.399 195.154 2
 2 13 -1 960.906 375.792 2
 -2 13 -1 1014.76 336.996 2
 2 13 0 9.76608 165.023 2
 -2 13 0 170.555 86.9268 2
 -2 13 1 1145.52 378.493 2
 2 13 1 1073.17 400.879 2
 -2 13 2 133.214 198.115 2
 2 13 2 647.819 318.043 2
 -2 13 3 61.8656 116.403 2
 2 13 3 424.682 269.771 2
 2 13 4 -62.4137 170.52 2
 -2 13 4 185.573 175.414 2
 3 0 -25 27.5112 101.355 2
 3 0 -24 155.363 146.732 2
 3 0 -23 -133.161 172.727 2
 3 0 -22 -58.5992 113.019 2
 3 0 -21 -123.516 214.512 2
 3 0 -20 54.0911 132.599 2
 3 0 -19 -52.8407 135.633 2
 3 0 -18 13.281 82.8295 2
 3 0 -17 -87.0129 106.55 2
 3 0 -16 -71.7778 83.9443 2
 3 0 -15 70.8013 152.622 2
 3 0 -14 24.1651 94.581 2
 3 0 -13 26.1258 89.9888 2
 3 0 -12 -35.7235 67.3624 2
 3 0 -11 96.2819 109.083 2
 3 0 -10 -116.085 112.052 2
 3 0 -9 81.5393 80.6258 2
 3 0 -8 269.549 167.469 2
 3 0 -7 116.726 92.1118 2
 3 0 -6 -102.572 93.0333 2
 3 0 -5 15.5095 58.9651 2
 3 0 -4 33.1626 45.7368 2
 3 0 -3 -34.2551 47.3495 2
 -3 0 -2 -49.3242 75.5182 1
 3 0 -2 -24.1584 49.7818 2
 -3 0 -1 25.5131 52.1461 1
 3 0 -1 -7.78841 42.6799 2
 3 0 0 -51.1462 63.7374 1
 3 0 0 -13.1635 38.4077 2
 -3 0 0 38.9443 49.6351 1
 -3 0 1 -0.87454 34.6084 2
 3 0 1 2.49325 44.8394 1
 -3 0 1 -34.9878 53.1205 1
 3 0 2 28.0953 67.4956 1
 -3 0 2 7.76317 53.6673 2
 -3 0 3 -4.43322 46.9126 2
 3 0 3 4.44537 50.5507 1
 -3 0 4 0.26561 64.9555 2
 3 0 4 4033.45 297.943 2
 3 0 5 -17.6284 51.668 2
 -3 0 5 -16.3598 42.7016 2
 3 0 6 -8.73674 35.3064 2
 3 0 7 33.5342 64.3723 2
 3 -1 -25 2102.72 532.381 2
 3 1 -25 2596.57 584.987 2
 3 1 -24 550.911 254.158 2
 3 -1 -24 881.987 322.284 2
 3 1 -23 509.852 250.259 2
 3 -1 -23 488.224 247.755 2
 3 -1 -22 145.999 154.7 2
 3 1 -22 -36.0376 122.389 2
 3 -1 -21 2833.26 556.831 2
 3 1 -21 2757.53 552.835 2
 3 1 -20 72.9448 149.715 2
 3 -1 -20 165.742 132.306 2
 -3 1 -20 529.891 259.608 2
 -3 1 -19 348.614 144.451 2
 3 -1 -19 312.58 196.329 2
 3 1 -19 319.39 171.906 2
 3 -1 -18 3574.75 572.609 2
 3 1 -18 3273.22 542.548 2
 -3 1 -18 3299.51 521.248 2
 3 -1 -17 446.113 209.875 2
 -3 1 -17 547.711 222.32 2
 3 1 -17 617.168 237.51 2
 3 1 -16 9822.01 902.66 2
 -3 1 -16 10602.2 849.964 2
 3 -1 -16 8974.47 839.25 2
 3 -1 -15 27645.3 1423.27 2
 3 1 -15 28432.5 1499 2
 -3 1 -15 28441 1344.12 2
 3 1 -14 2674.49 432.058 2
 3 -1 -14 2164.94 378.679 2
 -3 1 -14 2605.31 388.672 2
 3 1 -13 665.199 193.608 2
 -3 1 -13 919.954 229.453 2
 3 -1 -13 536.017 187.818 2
 3 -1 -12 1881.77 340.394 2
 3 1 -12 2077.07 359.188 2
 -3 1 -12 2369.42 346.171 2
 3 1 -11 397.392 162.777 2
 3 -1 -11 551.537 163.195 2
 -3 1 -11 429.612 145.079 2
 -3 1 -10 8994.73 608.433 2
 3 1 -10 8853.29 717.979 2
 3 -1 -10 9812.23 714.235 2
 3 -1 -9 7508.99 578.781 2
 -3 1 -9 7841.96 530.111 2
 3 1 -9 7774.51 613.785 2
 3 1 -8 3409.79 440.503 2
 -3 1 -8 2531.57 287.543 2
 3 -1 -8 3673.49 413.758 2
 3 1 -7 84.2913 62.7983 2
 3 -1 -7 161.361 93.0855 2
 -3 1 -7 181.135 74.1708 2
 -3 1 -6 7589.1 414.905 2
 3 1 -6 6985.8 511.517 2
 3 -1 -6 7180.82 492.505 2
 3 1 -5 599.762 148.591 2
 -3 1 -5 458.893 92.3251 2
 3 -1 -5 788.637 153.803 2
 3 -1 -4 32339.2 875.283 2
 3 1 -4 31414.9 965.414 2
 3 1 -3 20609.7 732.74 2
 -3 -1 -3 20060.8 698.909 1
 3 -1 -3 20908.5 631.259 2
 3 1 -2 39088.4 969.244 2
 3 -1 -2 40048.7 757.111 2
 -3 -1 -1 78470.5 1319.88 1
 3 -1 -1 83668.6 895.005 2
 3 1 -1 83728.4 1320.27 2
 3 1 0 308031 2724.48 1
 -3 1 0 319474 1988.56 1
 -3 -1 0 319183 2638.52 1
 3 1 0 311950 2401.56 2
 3 -1 0 315574 2042.7 1
 -3 1 1 86838 1018.62 1
 3 -1 1 83813.9 1148.35 1
 3 1 1 82426.3 1433.31 1
 -3 -1 1 79472 1282.03 2
 -3 -1 1 84382.5 1381.69 1
 -3 1 1 85533.4 957.364 2
 -3 1 2 39510.6 794.785 2
 3 -1 2 34413.4 806.491 1
 3 1 2 31989.7 922.881 1
 -3 -1 2 37832.9 968.653 2
 3 1 3 17613 715.235 1
 3 -1 3 21202 455.148 2
 -3 1 3 20244.9 663.454 2
 -3 -1 3 19683.4 746.218 2
 -3 1 4 30989.3 926.411 2
 3 1 4 45567.4 1221.08 1
 -3 -1 4 30260.1 1001.68 2
 3 -1 4 42466 807.079 2
 -3 1 5 610.6 152.41 2
 3 -1 5 579.438 109.254 2
 -3 -1 5 800.415 177.388 2
 3 -1 6 6657.73 419.961 2
 -3 1 6 7006.12 532.189 2
 3 -1 7 176.277 98.6557 2
 3 -1 8 2543.14 311.47 2
 3 2 -24 929.912 363.075 2
 -3 2 -24 949.29 310.477 2
 3 2 -23 1563.46 443.931 2
 -3 2 -23 1689.96 429.135 2
 -3 2 -22 427.936 229.024 2
 3 2 -22 757.715 307.416 2
 3 -2 -21 3060 593.032 2
 3 2 -21 3631.19 640.48 2
 -3 2 -21 3818.73 607.403 2
 3 2 -20 3257.87 578.052 2
 -3 2 -20 2770.6 494.43 2
 3 -2 -20 2721.48 535.354 2
 3 2 -19 820.43 313.842 2
 -3 2 -19 876.429 288.602 2
 3 -2 -19 589.686 266.706 2
 -3 2 -18 1485.3 344.064 2
 3 2 -18 1615.57 388.591 2
 3 -2 -18 1940.22 434.721 2
 3 -2 -17 1109.89 332.681 2
 3 2 -17 1061.88 344.153 2
 -3 2 -17 915.847 257.622 2
 3 -2 -16 12562.3 998.355 2
 -3 2 -16 13073.9 936.919 2
 3 2 -16 12045.3 1002.11 2
 -3 2 -15 25972.2 1273.58 2
 3 -2 -15 24985 1361.21 2
 3 2 -15 23641.3 1336.21 2
 3 -2 -14 415.568 199.968 2
 -3 2 -14 920.537 230.032 2
 3 2 -14 953.418 271.228 2
 3 2 -13 8674.28 774.476 2
 3 -2 -13 8373.76 734.991 2
 -3 2 -13 7104.31 615.06 2
 3 -2 -12 1046.29 250.561 2
 3 2 -12 1393.52 311.624 2
 -3 2 -12 1012.47 229.723 2
 3 2 -11 634.646 209.799 2
 3 -2 -11 831.556 215.684 2
 -3 2 -11 621.291 162.557 2
 3 2 -10 11712.6 824.954 2
 3 -2 -10 12303.2 795.072 2
 -3 2 -10 12297 704.21 2
 3 -2 -9 28034.4 1135.57 2
 3 2 -9 26902.5 1185.04 2
 -3 2 -9 30049.8 1032.51 2
 -3 2 -8 1102.6 192.52 2
 3 2 -8 1454.8 291.47 2
 3 2 -7 9835.08 665.677 2
 -3 2 -7 11189.2 558.693 2
 3 -2 -7 10372 622.888 2
 -3 2 -6 854.54 142.679 2
 3 2 -6 807.491 187.007 2
 3 -2 -6 761.852 164.454 2
 -3 2 -5 8494.06 392.803 2
 3 -2 -5 8418.05 488.367 2
 3 2 -5 8021.6 550.017 2
 3 2 -4 15029.7 730.996 2
 -3 2 -4 16196.2 466.587 2
 3 -2 -4 16826.7 634.303 2
 -3 2 -3 16504.5 399.151 2
 3 -2 -3 18114.3 608.674 2
 3 2 -3 16910 740.024 2
 -3 -2 -3 16380.4 675.716 1
 -3 -2 -2 32567.3 945.953 1
 3 2 -2 37412.5 1060.59 2
 -3 -2 -1 28147.1 871.373 1
 3 2 -1 29905 918.414 2
 -3 -2 0 1234.87 184.687 1
 3 2 0 1442.25 208.591 1
 3 -2 0 1668.54 128.449 1
 -3 2 0 1398.29 104.985 2
 3 -2 1 29433.1 605.322 1
 -3 -2 1 28713.6 904.091 1
 -3 2 1 29894.3 597.217 2
 -3 2 1 28307.1 444.294 1
 -3 -2 2 31103.7 971.356 2
 3 2 2 28005.4 944.442 1
 -3 2 3 17799.1 637.754 2
 3 -2 3 17867.9 424.709 2
 3 2 3 18420.5 786.344 1
 -3 -2 3 16112.1 749.85 2
 -3 2 4 16123.7 683.443 2
 3 -2 4 16271.3 494.799 2
 3 2 4 15128.6 753.063 1
 -3 2 5 8568.21 540.826 2
 3 -2 5 8359.94 414.6 2
 3 -2 6 1062.4 166.151 2
 3 -2 7 10309.7 569.578 2
 3 -2 8 1296.37 225.027 2
 -3 3 -24 472.122 247.887 2
 3 3 -24 491.82 303.542 2
 3 3 -23 120.378 132.887 2
 -3 3 -23 94.3905 166.614 2
 3 3 -22 1051.76 370.558 2
 -3 3 -22 673.488 255.419 2
 3 3 -21 3619.38 643.168 2
 -3 3 -21 3354.32 568.616 2
 3 3 -20 686.551 288.432 2
 -3 3 -20 506.613 226.689 2
 -3 3 -19 137.481 112.044 2
 3 3 -19 111.939 145.871 2
 -3 3 -18 2873.86 462.66 2
 3 3 -18 2949.55 532.797 2
 -3 3 -17 4644.81 577.334 2
 3 3 -17 4968.87 676.984 2
 -3 3 -16 1255.37 294.916 2
 3 3 -16 1639.56 386.04 2
 3 3 -15 11024 952.786 2
 -3 3 -15 9056.97 762.962 2
 -3 3 -14 1000.91 253.227 2
 3 3 -14 1080.79 304.63 2
 3 3 -13 8907.68 820.241 2
 -3 3 -13 8456.53 684.628 2
 -3 3 -12 2858.34 389.117 2
 3 3 -12 2991.15 463.811 2
 3 3 -11 4960.85 571.362 2
 -3 3 -11 4275.8 453.813 2
 3 3 -10 1454.61 335.765 2
 -3 3 -10 1680.09 268.146 2
 3 3 -9 12997.8 856.482 2
 -3 3 -9 12992.1 687.866 2
 3 3 -8 7862.84 655.285 2
 -3 3 -8 7131.21 489.269 2
 3 3 -7 11379.1 751.571 2
 -3 3 -7 11675.9 587.046 2
 3 3 -6 5692.09 519.783 2
 -3 3 -6 5410.51 374.11 2
 -3 3 -5 8195.83 418.358 2
 3 3 -5 8710.44 620.153 2
 3 3 -4 3502.56 385.385 2
 -3 3 -4 5109.87 330.193 2
 -3 3 -3 4817.88 271.462 2
 3 3 -3 4937.96 444.814 2
 -3 -3 -3 4192.73 371.722 1
 3 3 -2 5284.75 453.248 2
 -3 3 -2 4425.14 242.367 2
 -3 -3 -2 3445.97 337.037 1
 3 3 -1 13227.3 684.64 2
 -3 -3 -1 12704.6 637.115 1
 -3 -3 0 1743.45 239.901 1
 -3 -3 1 12839.3 661.141 1
 3 3 1 13012.3 681.246 1
 -3 3 2 4854.56 328.547 2
 -3 3 3 5320.88 370.264 2
 3 -3 4 3284.85 251.251 2
 -3 3 4 2892.85 319.026 2
 -3 3 5 8472.23 551.464 2
 3 -3 5 8207.88 436.308 2
 3 -3 6 5314.74 392.635 2
 3 -3 7 11836.2 633.831 2
 -3 4 -23 79.468 84.4747 2
 3 4 -23 148.072 130.662 2
 -3 4 -22 385.641 229.851 2
 3 4 -22 585.964 289.426 2
 3 4 -21 1369.88 402.675 2
 -3 4 -21 915.214 302.583 2
 -3 4 -20 105.284 92.1304 2
 3 4 -20 -40.4706 99.0163 2
 3 4 -19 1408.02 398.993 2
 -3 4 -19 1002.59 295.823 2
 -3 4 -18 171.861 135.745 2
 3 4 -18 55.1372 127.959 2
 3 4 -17 4368.62 654.967 2
 -3 4 -17 4149.35 554.657 2
 -3 4 -16 411.693 176.152 2
 3 4 -16 148.475 167.317 2
 -3 4 -15 1594.99 369.969 2
 3 4 -15 810.412 290.703 2
 -3 4 -14 315.906 146.201 2
 3 4 -14 394.433 216.86 2
 -3 4 -13 1051.33 257.116 2
 3 4 -13 1540.12 347.59 2
 3 4 -12 284.619 160.819 2
 -3 4 -12 -40.431 60.7546 2
 3 4 -11 4898.63 588.694 2
 -3 4 -11 4661.24 474.596 2
 3 4 -10 777.558 231.352 2
 -3 4 -10 898.176 204.292 2
 3 4 -9 6280.86 637.039 2
 -3 4 -9 6028.34 496.888 2
 3 4 -8 6958.02 649.297 2
 -3 4 -8 6103.89 481.5 2
 -3 4 -7 2146.93 268.496 2
 3 4 -7 2088.88 343.438 2
 -3 4 -6 6496.22 439.449 2
 3 4 -6 7631.55 648.201 2
 3 4 -5 618.597 182.157 2
 -3 4 -5 379.811 106.315 2
 -3 4 -4 6222.81 395.384 2
 3 4 -4 5846.61 535.738 2
 -3 4 -3 2090.32 215.627 2
 -3 -4 -3 2432.44 306.906 1
 3 4 -3 2296.07 332.191 2
 -3 -4 -2 3928.23 385.437 1
 -3 4 -2 3256.88 266.28 2
 3 4 -2 4021.31 434.564 2
 -3 -4 -1 2989.05 336.872 1
 3 4 -1 2569.9 334.688 2
 -3 -4 0 1160.72 213.519 1
 -3 -4 1 3404.08 366.716 1
 -3 4 4 5068.37 216.89 1
 3 -4 5 617.195 137.478 2
 3 -4 6 5573.35 432.943 2
 3 -4 7 1754.43 262.217 2
 3 5 -23 193.131 222.181 2
 -3 5 -23 279.023 201.716 2
 -3 5 -22 -31.5251 109.059 2
 3 5 -22 358.81 192.914 2
 3 5 -21 422.64 271.033 2
 -3 5 -21 214.157 163.348 2
 3 5 -20 404.162 180.457 2
 -3 5 -20 842.994 291.435 2
 3 5 -19 54.5456 191.9 2
 -3 5 -19 72.7882 122.39 2
 3 5 -18 126.166 100.56 2
 -3 5 -18 16.6967 75.1808 2
 -3 5 -17 41.5511 68.035 2
 3 5 -17 99.2882 124.709 2
 -3 5 -16 442.779 188.326 2
 3 5 -16 698.283 257.209 2
 3 5 -15 718.981 255.273 2
 -3 5 -15 628.105 221.569 2
 3 5 -14 1170.07 341.272 2
 -3 5 -14 1364.54 300.018 2
 3 5 -13 771.58 263.313 2
 -3 5 -13 704.878 211.717 2
 -3 5 -12 744.952 213.741 2
 3 5 -12 796.097 254.184 2
 -3 5 -11 2591.57 375.365 2
 3 5 -11 1846.29 374.905 2
 3 5 -10 4514.39 576.782 2
 -3 5 -10 4594.97 480.818 2
 3 5 -9 4224.78 541.55 2
 -3 5 -9 3925.06 423.135 2
 -3 5 -8 3360.78 373.709 2
 3 5 -8 2989.44 449.38 2
 -3 5 -7 1428.35 234.939 2
 3 5 -7 2168.2 384.516 2
 3 5 -6 768.216 262.638 2
 -3 5 -6 857.058 181.616 2
 -3 -5 -5 1474.39 256.943 1
 3 5 -5 2053.24 359.387 2
 -3 5 -5 1685.04 241.649 2
 -3 -5 -4 3303.28 370.769 1
 3 5 -4 2283.82 361.303 2
 -3 5 -4 2935.2 320.35 2
 -3 -5 -3 2085.57 292.958 1
 3 5 -3 1748.52 311.503 2
 -3 5 -3 1428.79 208.513 2
 -3 -5 -2 475.582 139.79 1
 -3 5 -2 536.738 133.742 2
 3 5 -2 1089.49 254.623 2
 -3 -5 -1 32467.2 1165.37 1
 3 5 -1 29140 1213.82 2
 -3 -5 0 -3.36962 96.1255 1
 -3 -5 1 32156.6 1198.37 1
 -3 -5 2 647.193 175.385 1
 -3 5 5 1287.07 128.847 1
 -3 5 6 611.697 108.286 1
 -3 6 -22 395.295 228.422 2
 3 6 -22 2.44728 124.151 2
 -3 6 -21 383.999 200.473 2
 3 6 -21 757.567 337.38 2
 -3 6 -20 1034.28 330.051 2
 3 6 -20 1390.83 413.321 2
 -3 6 -19 -14.7303 59.2623 2
 3 6 -19 166.971 150.268 2
 -3 6 -18 -30.4473 95.1429 2
 3 6 -18 154.893 168.024 2
 -3 6 -17 438.592 215.577 2
 3 6 -17 551.826 226.522 2
 -3 6 -16 487.652 187.03 2
 3 6 -16 257.948 167.318 2
 3 6 -15 1783.99 421.952 2
 -3 6 -15 1668.06 369.558 2
 -3 6 -14 933.11 259.774 2
 3 6 -14 649.888 264.579 2
 3 6 -13 1234.51 358.958 2
 -3 6 -13 941.293 277.675 2
 -3 6 -12 1075.97 265.274 2
 3 6 -12 1396.3 345.898 2
 -3 6 -11 1008.58 246.549 2
 3 6 -11 746.642 277.652 2
 -3 6 -10 5465.67 544.749 2
 3 6 -10 5099.23 636.156 2
 3 6 -9 5383.18 652.156 2
 -3 6 -9 4498.65 479.597 2
 -3 6 -8 2143.52 315.973 2
 3 6 -8 3404.59 499.392 2
 3 6 -7 3460.36 516.019 2
 -3 6 -7 2608.32 347.071 2
 3 6 -6 1261.34 317.041 2
 -3 6 -6 876.908 194.105 2
 3 6 -5 1400.61 312.837 2
 -3 -6 -5 1294.28 252.827 1
 -3 6 -5 809.917 185.042 2
 3 6 -4 891.701 277.747 2
 -3 6 -4 527.525 158.521 2
 3 6 -3 4337.68 535.097 2
 -3 -6 -3 3204.03 392.441 1
 -3 6 -3 3433.68 360.502 2
 -3 -6 -2 4531.96 468.446 1
 -3 6 -2 4205.34 405.311 2
 3 6 -2 5652.63 600.288 2
 -3 -6 -1 9143.59 657.894 1
 3 6 -1 9019.37 741.95 2
 3 -6 0 16.6419 25.2535 1
 -3 -6 0 2.76624 81.9666 1
 -3 -6 1 9713.44 706.212 1
 -3 -6 2 4295.63 502.26 1
 -3 -6 3 4068.95 480.599 1
 -3 6 6 768.555 115.131 1
 -3 6 7 2247.74 225.119 1
 -3 6 8 2565.25 266.882 1
 -3 6 9 3691.37 348.73 1
 -3 7 -21 1623.61 414.547 2
 3 7 -21 1715.03 471.453 2
 -3 7 -20 434.678 217.38 2
 3 7 -20 762.376 339.68 2
 -3 7 -19 718.287 268.913 2
 3 7 -19 670.051 290.242 2
 3 7 -18 1227.79 403.357 2
 -3 7 -18 1787.09 403.327 2
 -3 7 -17 835.082 260.02 2
 3 7 -17 489.13 257.064 2
 3 7 -16 722.394 266.161 2
 -3 7 -16 635.13 225.5 2
 3 7 -15 3456.06 596.834 2
 -3 7 -15 3797.65 543.6 2
 -3 7 -14 232.744 146.564 2
 3 7 -14 -142.727 187.22 2
 -3 7 -13 2035.37 383.552 2
 3 7 -13 2204.17 469.648 2
 3 7 -12 2183.85 462.535 2
 -3 7 -12 1997.61 372.633 2
 -3 7 -11 2302.34 383.256 2
 3 7 -11 2735.94 516.022 2
 -3 7 -10 194.264 140.385 2
 3 7 -10 133.341 115.672 2
 -3 7 -9 9185.32 723.553 2
 3 7 -9 9389.72 888.38 2
 -3 7 -8 7299.12 634.558 2
 3 7 -8 6118.45 721.343 2
 3 7 -7 4436.65 599.003 2
 -3 7 -7 4165.2 472.926 2
 -3 7 -6 7043.8 600.979 2
 3 7 -6 7936.82 800.438 2
 3 7 -5 1694.24 363.305 2
 -3 7 -5 1375.16 271.569 2
 -3 -7 -5 1286.49 272.004 1
 3 7 -4 2392.79 423.224 2
 -3 7 -4 2284.74 343.798 2
 -3 -7 -3 10912.4 759.791 1
 -3 7 -3 11201.5 721.226 2
 3 7 -3 10897.2 907.973 2
 3 7 -2 2343.68 441.696 2
 -3 -7 -2 1654.69 300.271 1
 -3 7 -2 1351.72 247.585 2
 3 7 -1 14284.8 1008.48 2
 -3 7 -1 13027.2 767.456 2
 -3 -7 -1 12805.1 826.705 1
 -3 -7 0 7392.24 644.882 1
 3 -7 0 4943.59 266.231 1
 3 -7 1 11557.2 471.562 1
 -3 -7 1 14568.2 910.722 1
 -3 -7 2 1571.44 312.722 1
 -3 -7 3 12418.9 883.494 1
 -3 -7 4 2294.56 390.881 1
 -3 7 7 3470.56 268.786 1
 3 8 -19 1008.1 383.515 2
 -3 8 -19 1343.32 363.213 2
 -3 8 -18 1248.78 344.208 2
 3 8 -18 1591.2 469.547 2
 -3 8 -17 474.784 216.871 2
 3 8 -17 408.604 215.859 2
 -3 8 -16 354.315 163.554 2
 3 8 -16 506.622 258.525 2
 -3 8 -15 1660.05 375.481 2
 3 8 -15 1693.05 461.706 2
 -3 8 -14 1582.62 369.552 2
 3 8 -14 1842.55 461.581 2
 3 8 -13 3624.4 625.041 2
 -3 8 -13 2489.08 441.208 2
 3 8 -12 23.7558 110.359 2
 -3 8 -12 -20.1125 124.964 2
 -3 8 -11 1876.64 361.979 2
 3 8 -11 2067.22 465.067 2
 -3 8 -10 928.534 246.251 2
 3 8 -10 719.519 298.569 2
 3 8 -9 110.176 91.1226 2
 -3 8 -9 16.6482 80.0744 2
 -3 8 -8 5146.59 568.375 2
 3 8 -8 5895.34 749.422 2
 -3 8 -7 3885.87 483.276 2
 3 8 -7 3447.48 569.198 2
 3 8 -6 1923.59 427.224 2
 -3 8 -6 2508.22 387.643 2
 -3 8 -5 4278.53 499.174 2
 3 8 -5 3854.45 582.072 2
 -3 -8 -5 4100.25 484.008 1
 3 8 -4 659.738 278.47 2
 -3 8 -4 714.101 206.763 2
 -3 -8 -3 14937.3 931.45 1
 -3 8 -3 13906.8 882.174 2
 3 8 -3 15292.2 1149.07 2
 -3 8 -2 4766.5 512.628 2
 -3 -8 -2 4380.93 508.716 1
 3 8 -2 5230.5 670.866 2
 -3 8 -1 6302.59 598.191 2
 3 8 -1 5856.49 699.754 2
 -3 -8 -1 6001.89 602.993 1
 3 8 0 14192.4 1049.02 2
 -3 -8 0 15271.6 967.234 1
 -3 -8 1 5487.58 598.827 1
 3 -8 1 3074.62 263.873 1
 -3 -8 2 4375.32 534.085 1
 3 -8 2 2349.39 253.472 1
 -3 -8 3 14343 996.824 1
 -3 -8 4 269.082 116.072 1
 -3 -8 5 5270.93 637.994 1
 3 9 -18 434.1 254.339 2
 3 9 -17 164.511 173.679 2
 3 9 -16 1286.59 399.12 2
 -3 9 -16 605.935 263.388 2
 3 9 -15 -150.73 200.418 2
 -3 9 -15 195.816 161.998 2
 -3 9 -14 251.918 158.465 2
 3 9 -14 651.74 303.33 2
 -3 9 -13 1701.86 379.167 2
 3 9 -13 1404.46 416.995 2
 -3 9 -12 246.94 151.083 2
 3 9 -12 102.513 92.9194 2
 -3 9 -11 323.378 164.77 2
 3 9 -11 282.789 102.896 2
 3 9 -10 479.286 256.414 2
 -3 9 -10 333.378 179.331 2
 3 9 -9 1980.77 475.333 2
 -3 9 -9 1290.16 310.127 2
 3 9 -8 2392.55 507.94 2
 -3 9 -8 2412.2 412.561 2
 3 9 -7 139.665 160.171 2
 -3 9 -7 351.184 178.695 2
 -3 9 -6 264.117 156.583 2
 3 9 -6 402.547 224.598 2
 -3 9 -5 1786.72 349.838 2
 3 9 -5 1905.03 431.592 2
 -3 -9 -5 1963.8 348.053 1
 -3 9 -4 1766.68 344.638 2
 -3 -9 -4 2016.45 370.035 1
 3 9 -4 2515.68 496.827 2
 -3 9 -3 1785.71 336.191 2
 3 9 -3 2572 510.965 2
 -3 -9 -3 2192.73 379.626 1
 3 9 -2 4520.23 674.736 2
 -3 -9 -2 3854.18 504.769 1
 -3 9 -2 4006.77 516.234 2
 3 9 -1 6638.34 797.357 2
 -3 -9 -1 6914.46 681.887 1
 -3 9 -1 6686.94 666.119 2
 -3 9 0 3778.31 496.895 2
 3 9 0 3409.58 585.422 2
 -3 -9 0 4254.29 541.247 1
 -3 -9 1 6348.11 678.396 1
 -3 -9 2 4148.78 554.43 1
 -3 -9 3 2028.92 405.928 1
 -3 -9 4 2041.67 415.247 1
 -3 -9 5 1544.43 351.673 1
 -3 -9 6 85.8752 90.4825 1
 3 10 -16 -21.0424 127.732 2
 3 10 -15 285.798 236.709 2
 3 10 -14 -349.845 223.889 2
 3 10 -13 153.253 159.526 2
 3 10 -12 740.623 304.553 2
 -3 10 -12 659.752 251.311 2
 -3 10 -11 331.789 176.947 2
 3 10 -11 369.597 220.859 2
 3 10 -10 9.28579 89.358 2
 -3 10 -10 47.1737 95.1662 2
 3 10 -9 345.739 216.877 2
 -3 10 -9 141.967 133.283 2
 -3 10 -8 198.155 134.967 2
 3 10 -8 252.613 217.951 2
 -3 10 -7 548.986 218.271 2
 3 10 -7 516.365 274.1 2
 -3 10 -6 1092.22 304.263 2
 3 10 -6 1160.4 442.712 2
 -3 10 -5 66.8875 79.9231 2
 3 10 -5 93.1728 127.75 2
 -3 -10 -4 549.903 208.262 1
 3 10 -4 694.064 298.161 2
 -3 10 -4 484.749 188.969 2
 -3 10 -3 -108.633 104.812 2
 -3 -10 -3 16.7968 60.1681 1
 -3 10 -2 406.886 190.023 2
 -3 -10 -2 219.034 115.576 1
 -3 10 -1 357.902 164.963 2
 -3 -10 -1 364.732 166.574 1
 3 10 -1 510.923 239.662 2
 -3 -10 0 385.174 192.168 1
 -3 10 0 169.344 121.122 2
 3 10 0 171.098 176.344 2
 3 10 1 552.21 257.833 2
 -3 -10 1 649.61 232.402 1
 -3 -10 2 790.169 261.827 1
 -3 -10 3 186.344 160.639 1
 -3 -10 4 183.885 173.542 1
 -3 -10 5 96.151 162.875 1
 -3 -10 6 1075.37 320.364 1
 -3 -10 7 768.584 288.01 1
 -3 -10 8 318.867 208 1
 3 11 -13 1650.81 467.898 2
 3 11 -12 250.175 198.953 2
 3 11 -11 1089.35 375.531 2
 3 11 -10 284.359 189.051 2
 3 11 -9 1093.24 403.721 2
 -3 11 -8 153.107 149.494 2
 3 11 -8 189.971 169.383 2
 -3 11 -7 332.808 161.736 2
 3 11 -7 225.191 201.026 2
 -3 11 -6 140.041 153.687 2
 3 11 -6 29.6743 139.106 2
 3 11 -5 74.5531 135.783 2
 -3 11 -5 405.42 183.966 2
 3 11 -4 254.41 231.962 2
 -3 11 -4 609.131 269.908 2
 -3 11 -3 1036.76 307.438 2
 3 11 -3 407.676 258.858 2
 3 11 -2 2007.39 530.734 2
 -3 11 -2 1080.86 321.6 2
 -3 -11 -2 1231.65 309.397 1
 -3 -11 -1 177.414 122.254 1
 3 11 -1 -66.0223 154.048 2
 -3 11 -1 -33.373 95.4064 2
 3 11 0 1231.12 393.512 2
 -3 -11 0 1171.38 309.659 1
 -3 11 0 1201.84 337.591 2
 -3 -11 1 240.27 101.045 1
 -3 11 1 -39.6991 111.879 2
 3 11 1 -61.0503 193.43 2
 3 11 2 1884.19 480.265 2
 -3 -11 2 1830.2 392.576 1
 -3 -11 3 869.096 297.153 1
 -3 -11 4 147.445 124.38 1
 -3 -11 5 183.47 118.969 1
 -3 -11 6 105.865 124.488 1
 -3 -11 7 43.7608 146.133 1
 -3 -11 8 117.88 134.351 1
 -3 -11 9 1670.59 457.911 1
 3 12 -10 165.055 147.696 2
 3 12 -9 1709.08 521.475 2
 3 12 -8 490.975 237.577 2
 3 12 -7 461.16 267.531 2
 3 12 -6 -133.72 96.0603 2
 3 12 -5 389.477 251.939 2
 3 12 -4 230.259 192.18 2
 -3 12 -3 226.323 220.162 2
 3 12 -3 1703.65 496.768 2
 3 12 -2 245.148 181.412 2
 -3 12 -2 328.599 158.216 2
 -3 12 -1 1035.68 325.544 2
 3 12 -1 856.907 336 2
 -3 12 0 1690 417.991 2
 3 12 0 840.018 383.15 2
 -3 12 1 764.163 299.621 2
 3 12 1 746.986 288.075 2
 -3 12 2 365.806 192.829 2
 3 12 2 840.626 338.471 2
 3 12 3 1040.18 377.534 2
 -3 12 3 824.364 303.473 2
 3 13 -3 798.808 339.231 2
 3 13 -2 503.797 318.395 2
 3 13 -1 -40.8787 143.623 2
 3 13 0 829.183 372.699 2
 3 13 1 521.421 339.324 2
 3 13 2 474.427 283.745 2
 3 13 3 689.617 349.285 2
 4 0 -24 499.523 281.472 2
 4 0 -23 948.831 370.42 2
 4 0 -22 1825.11 455.231 2
 4 0 -21 443.628 192.933 2
 4 0 -20 1538.96 394.732 2
 4 0 -19 2696.5 516.783 2
 4 0 -18 1985.04 447.643 2
 4 0 -17 358.306 214.456 2
 4 0 -16 10236.2 910.032 2
 4 0 -15 3017.73 505.277 2
 4 0 -14 5544.68 636.375 2
 4 0 -13 1409.82 312.54 2
 4 0 -12 165.654 104.154 2
 4 0 -11 8527.8 709.351 2
 4 0 -10 5627.31 540.247 2
 4 0 -9 20023.6 985.952 2
 4 0 -8 31207.4 1182.61 2
 4 0 -7 16918.2 828.177 2
 4 0 -6 16164.6 783.112 2
 4 0 -5 4783.89 401.378 2
 4 0 -4 16135.3 678.952 2
 4 0 -3 152074 1932.5 2
 4 0 -2 88548.2 1370.1 2
 -4 0 -2 88671.2 1439.8 1
 4 0 -1 157640 1695.62 2
 -4 0 -1 160620 1926.96 1
 4 0 0 9524.16 493.224 1
 4 0 0 10371.2 401.988 2
 -4 0 0 10382.3 485.004 1
 -4 0 1 156891 1895.06 1
 4 0 1 154497 2048.92 1
 -4 0 1 151773 1681.06 2
 -4 0 2 84721.6 1432.48 1
 -4 0 2 84408.5 1386.76 2
 4 0 2 84596.4 1563.87 1
 4 0 3 150360 2181.09 1
 -4 0 3 147569 2021.56 2
 4 0 4 16901.1 761.096 1
 -4 0 4 15322.8 704.304 2
 -4 0 5 4144.8 399.444 2
 4 0 5 5115.97 360.736 2
 4 0 6 18272.6 724.211 2
 4 0 7 14709.7 706.372 2
 4 -1 -24 544.678 263.837 2
 4 1 -24 256.403 184.283 2
 4 -1 -23 1090.19 383.637 2
 4 1 -23 1484 448.741 2
 4 1 -22 1784.45 459.67 2
 4 -1 -22 1144.71 378.879 2
 4 -1 -21 35.9736 93.2223 2
 4 1 -21 -104.028 181.038 2
 4 -1 -20 704.875 286.222 2
 4 1 -20 409.545 226.447 2
 4 -1 -19 2170.5 456.861 2
 4 1 -19 1590.31 395.521 2
 4 -1 -18 340.483 186.967 2
 4 1 -18 649.782 253.672 2
 4 1 -17 1670.4 376.905 2
 4 -1 -17 1600.96 388.09 2
 4 -1 -16 3896.47 564.305 2
 4 1 -16 3978.3 597.607 2
 4 -1 -15 1917.45 388.423 2
 -4 1 -15 1968.36 365.421 2
 4 1 -15 1613.9 371.555 2
 -4 1 -14 4912.24 533.143 2
 4 1 -14 4503.76 582.046 2
 4 -1 -14 4911.89 596.859 2
 4 -1 -13 2840.33 442.627 2
 -4 1 -13 2586.73 372.476 2
 4 1 -13 2594.93 420.516 2
 4 1 -12 741.526 217.68 2
 4 -1 -12 1299.16 308.672 2
 -4 1 -12 825.104 206.734 2
 4 1 -11 4102.72 505.047 2
 4 -1 -11 3502.46 454.239 2
 -4 1 -11 3910.3 414.129 2
 4 -1 -10 2189.69 344.697 2
 -4 1 -10 2274.18 296.858 2
 4 1 -10 2055.01 344.065 2
 4 -1 -9 1693.88 287.356 2
 -4 1 -9 1346.65 220.909 2
 4 1 -9 1623.02 304.964 2
 4 1 -8 10395.7 709.685 2
 4 -1 -8 10097.1 672.799 2
 4 1 -7 5394.6 491.868 2
 4 -1 -7 5673.96 503.832 2
 4 1 -6 3946.58 393.942 2
 4 -1 -6 4103.35 379.876 2
 4 -1 -5 15975.1 693.118 2
 4 1 -5 15650.9 757.912 2
 4 -1 -4 7937.27 448.889 2
 4 1 -4 8506.88 530.505 2
 4 1 -3 19707 773.182 2
 4 -1 -3 19989 649.246 2
 -4 -1 -3 18673.8 728.899 1
 4 -1 -2 22048.9 612.193 2
 -4 -1 -2 20817.3 768.797 1
 4 1 -2 21687.8 782.136 2
 -4 1 -1 28955.7 732.322 1
 4 -1 -1 28417.2 610.102 2
 4 1 -1 26404.5 813.857 2
 -4 -1 -1 28100.1 885.959 1
 4 -1 0 10071 296.696 2
 4 1 0 10303.2 489.814 2
 -4 1 0 9907.45 289.185 2
 4 1 0 10135.8 560.047 1
 4 -1 0 9473.17 432.682 1
 -4 -1 0 10417.1 542.095 1
 -4 1 0 10093.7 419.321 1
 -4 -1 1 25250.4 848.833 1
 -4 1 1 25287 591.733 2
 4 1 1 24849.2 878.337 1
 -4 1 1 25150.6 672.555 1
 4 -1 1 26404.3 759.25 1
 -4 1 2 20635.3 619.982 2
 -4 1 2 20161.9 622.785 1
 4 1 2 19641.8 804.768 1
 4 -1 2 20957.6 722.967 1
 -4 -1 2 20743.9 767.922 2
 -4 1 3 18817.9 675.7 2
 4 -1 3 19041.9 723.134 1
 4 -1 3 19215.6 431.275 2
 -4 -1 3 18573.5 772.548 2
 4 1 3 18007.8 799.958 1
 -4 1 4 7850.33 482.6 2
 -4 -1 4 7661.6 531.945 2
 4 -1 4 8068.35 339.688 2
 -4 1 5 14682 725.894 2
 4 -1 5 16648.6 583.145 2
 4 -1 6 3702.27 305.839 2
 4 -1 7 5981.31 429.758 2
 4 -1 8 9904.88 600.588 2
 4 2 -24 -17.2986 88.5167 2
 4 -2 -23 1102.5 372.604 2
 4 2 -23 1545.18 424.164 2
 4 2 -22 40.6603 234.484 2
 4 -2 -22 199.921 175.357 2
 4 2 -21 13.3961 162.601 2
 -4 2 -21 148.331 148.335 2
 4 -2 -21 91.7368 126.025 2
 4 -2 -20 924.301 316.542 2
 4 2 -20 1268.16 376.081 2
 -4 2 -20 1316 352.549 2
 4 2 -19 894.005 297.764 2
 4 -2 -19 1632.46 410.303 2
 -4 2 -19 1273.2 329.556 2
 4 2 -18 2052.91 456.085 2
 -4 2 -18 2552.45 447.785 2
 4 -2 -18 1670.15 401.567 2
 4 -2 -17 450.464 230.069 2
 -4 2 -17 675.131 235.621 2
 4 2 -17 104.213 148.976 2
 -4 2 -16 638.124 226.526 2
 4 -2 -16 484.896 241.426 2
 4 2 -16 1106.06 335.07 2
 -4 2 -15 1266.77 287.524 2
 4 -2 -15 1199.43 305.335 2
 4 2 -15 977.808 278.042 2
 -4 2 -14 73.7593 124.721 2
 4 -2 -14 0.33291 111.945 2
 4 2 -14 150.457 110.978 2
 4 2 -13 461.606 199.688 2
 -4 2 -13 714.687 209.272 2
 4 -2 -13 601.729 217.717 2
 4 -2 -12 832.738 238.067 2
 4 2 -12 1195.77 300.385 2
 -4 2 -12 951.829 215.102 2
 -4 2 -11 78.5678 87.1764 2
 4 -2 -11 146.452 119.029 2
 4 2 -11 152.589 121.031 2
 4 2 -10 1849.34 340.902 2
 -4 2 -10 1872.54 265.367 2
 4 -2 -10 1363.92 272.201 2
 4 2 -9 8447.27 684.301 2
 4 -2 -9 8866.2 645.169 2
 -4 2 -9 9187.05 552.749 2
 4 -2 -8 12309.7 722.177 2
 4 2 -8 12590.3 805.645 2
 -4 2 -8 12619.8 601.663 2
 4 2 -7 5100.01 497.783 2
 4 -2 -7 4685.36 425.595 2
 -4 2 -7 5026.9 352.878 2
 -4 2 -6 2830.05 234.779 2
 4 -2 -6 2906.17 311.397 2
 4 2 -6 3014.65 375.282 2
 4 -2 -5 8841.07 509.449 2
 4 2 -5 8292.09 587.273 2
 -4 2 -5 8082.66 351.152 2
 -4 -2 -4 1536.12 230.638 1
 -4 2 -4 1635.85 131.939 2
 4 2 -4 1837.91 273.317 2
 4 -2 -4 1584.28 204.807 2
 4 2 -3 4724.99 428.1 2
 4 -2 -3 4753.66 314.514 2
 -4 -2 -3 4350.46 383.167 1
 4 2 -2 8359.04 532.473 2
 -4 -2 -2 7632.24 495.858 1
 4 -2 -2 7930.5 351.135 2
 4 2 -1 21426.3 835.951 2
 -4 -2 -1 21729.6 834.954 1
 4 2 0 1040.3 174.85 2
 4 -2 0 1140.21 132.27 1
 -4 -2 0 1168.71 197.109 1
 -4 2 1 20441.2 517.677 2
 -4 -2 1 21266.2 847.957 1
 -4 2 1 21045.4 507.844 1
 4 -2 1 21622.2 618.349 1
 -4 2 2 7853.94 378.879 2
 -4 -2 2 6936.91 474.731 2
 4 -2 2 8049.42 409.733 1
 -4 -2 2 6896.54 494.935 1
 -4 2 2 7900.46 323.294 1
 -4 2 3 4427.81 323.429 2
 4 -2 4 1730.61 147.585 2
 -4 2 4 1817.93 234.254 2
 -4 2 5 8693.54 553.798 2
 4 -2 5 9067.38 398.699 2
 4 -2 6 3044.4 266.103 2
 4 -2 7 4813.65 380.392 2
 4 -2 8 12682.2 667.978 2
 4 3 -24 1172.85 399.795 2
 -4 3 -24 1063.38 339.192 2
 -4 3 -23 309.203 173.701 2
 4 3 -23 322.904 227.374 2
 -4 3 -22 1026.93 300.487 2
 4 3 -22 1903.62 511.103 2
 -4 3 -21 274.157 205.403 2
 4 3 -21 70.5445 197.551 2
 -4 3 -20 1369.64 344.186 2
 4 3 -20 1197.61 397.987 2
 -4 3 -19 1007.98 331.062 2
 4 3 -19 985.925 354.782 2
 4 3 -18 1816.98 411.918 2
 -4 3 -18 2197.78 419.927 2
 -4 3 -17 1565.94 343.08 2
 4 3 -17 1425.04 409.003 2
 4 -3 -17 1304.94 356.156 2
 4 3 -16 5648.81 719.829 2
 -4 3 -16 5116.99 581.771 2
 4 -3 -16 5223.13 682.267 2
 4 3 -15 5149.48 663.939 2
 -4 3 -15 4139.38 504.033 2
 4 -3 -15 4324.42 586.995 2
 -4 3 -14 1304.91 277.227 2
 4 -3 -14 948.377 286.154 2
 4 3 -14 1847.26 395.84 2
 4 -3 -13 2611.04 441.975 2
 -4 3 -13 3442.5 422.759 2
 4 3 -13 2979.21 497.267 2
 -4 3 -12 1002.1 218.489 2
 4 3 -12 1269.08 316.7 2
 4 -3 -12 1126.9 274.875 2
 4 -3 -11 7780.47 680.286 2
 4 3 -11 6883.17 689.385 2
 -4 3 -11 6627.5 530.926 2
 4 3 -10 1945.23 349.349 2
 -4 3 -10 1870.31 272.636 2
 4 -3 -10 1954.69 327.879 2
 4 3 -9 4938.7 545.774 2
 -4 3 -9 5512.56 436.463 2
 4 -3 -9 5127.06 509.598 2
 -4 3 -8 1340.69 213.482 2
 4 3 -8 1398.64 287.236 2
 4 -3 -8 1340.76 250.933 2
 4 3 -7 2807.68 392.982 2
 -4 3 -7 5035.17 383.761 2
 -4 3 -6 7072.69 385.333 2
 4 3 -6 6990.62 596.855 2
 -4 3 -5 3618.01 250.15 2
 4 3 -5 3252.57 410.525 2
 4 3 -4 119.132 113.196 2
 -4 -3 -4 227.59 102.905 1
 -4 3 -4 257.693 56.6224 2
 -4 3 -3 4507.95 214.38 2
 4 3 -3 5402.26 480.977 2
 -4 -3 -3 4471.92 415.443 1
 -4 3 -2 4350.88 194.522 2
 4 3 -2 5302.58 470.715 2
 -4 -3 -2 5108.57 441.654 1
 4 3 -1 5433.35 468.375 2
 -4 -3 -1 5915.07 467.64 1
 -4 3 -1 5029.99 210.093 2
 -4 3 0 16072.5 429.317 2
 4 -3 0 15537.1 393.014 1
 -4 -3 0 16982.9 797.469 1
 -4 3 1 6073.47 307.772 2
 -4 -3 1 4906.8 440.777 1
 4 -3 1 6032.39 291.489 1
 -4 -3 2 5168.33 458.91 1
 -4 3 2 4739.38 314.494 2
 -4 3 3 4448.05 202.773 1
 -4 3 3 4836.34 355.862 2
 -4 3 4 292.631 99.7675 2
 4 -3 4 163.757 56.5266 2
 4 -3 5 3463.42 261.685 2
 -4 3 5 3337.7 359.96 2
 4 -3 6 6801.28 409.584 2
 4 -3 7 4056.44 369.717 2
 4 -3 8 1288.1 219.356 2
 4 4 -23 2798.81 618.536 2
 -4 4 -23 2744.08 540.986 2
 4 4 -22 2230.07 546.299 2
 -4 4 -22 3051.06 540.885 2
 -4 4 -21 759.468 261.054 2
 4 4 -21 662.518 302.41 2
 4 4 -20 991.068 347.77 2
 -4 4 -20 493.203 217.74 2
 4 4 -19 1428.69 406.748 2
 -4 4 -19 1583.71 362.845 2
 -4 4 -18 1500.74 341.711 2
 4 4 -18 1111.52 351.61 2
 4 4 -17 4434.24 666.296 2
 -4 4 -17 3454.22 501.277 2
 4 4 -16 7065.72 818.838 2
 -4 4 -16 4994.02 581.444 2
 -4 4 -15 995.055 255.638 2
 4 4 -15 921.109 316.153 2
 4 4 -14 4449.78 635.191 2
 -4 4 -14 2970.03 413.8 2
 -4 4 -13 14621 888.846 2
 4 4 -13 14530.1 1093.29 2
 4 4 -12 2855.97 478.274 2
 -4 4 -12 2530.11 356.017 2
 4 4 -11 8212.11 770.956 2
 -4 4 -11 8328.01 618.624 2
 4 4 -10 4669.93 568.532 2
 -4 4 -10 5076.22 455.109 2
 4 4 -9 600.942 195.444 2
 -4 4 -9 550.147 145.555 2
 4 4 -8 7904.72 708.341 2
 -4 4 -8 8346.84 524.717 2
 -4 4 -7 17290.4 720.293 2
 4 4 -7 14973 943.108 2
 4 4 -6 326.139 145.879 2
 -4 4 -6 584.179 121.38 2
 -4 -4 -5 25445 1052.7 1
 -4 4 -5 24166.5 728.607 2
 4 4 -5 24747.1 1175.12 2
 4 4 -4 575.621 185.649 2
 -4 4 -4 483.406 99.4707 2
 -4 -4 -4 221.052 124.409 1
 -4 4 -3 3983.22 265.405 2
 4 4 -3 3584.6 431.861 2
 -4 -4 -3 3846.53 408.692 1
 -4 4 -2 5103.04 291.262 2
 -4 -4 -2 5393.54 481.096 1
 4 4 -2 5629.49 533.102 2
 4 4 -1 14971.7 848.149 2
 -4 -4 -1 14722.5 785.155 1
 -4 -4 0 2314.87 320.319 1
 4 -4 1 14237.1 410.166 1
 -4 -4 1 15616 837.992 1
 -4 -4 2 6190.44 535.876 1
 -4 4 2 5837.65 390.27 2
 -4 4 3 3628.2 334.402 2
 -4 4 4 535.153 145.254 2
 4 -4 6 325.493 105.676 2
 4 -4 7 14750.2 700.048 2
 4 -4 8 7716.25 547.818 2
 -4 5 -22 1963.68 448.23 2
 4 5 -22 1773.15 493.473 2
 -4 5 -21 18.4685 67.2317 2
 4 5 -21 72.3127 108.609 2
 -4 5 -20 792.52 275.26 2
 4 5 -20 975.597 364.818 2
 4 5 -19 3652.91 650.972 2
 -4 5 -19 2888.32 489.144 2
 -4 5 -18 264.129 138.403 2
 4 5 -18 717.577 306.745 2
 4 5 -17 3328.14 586.173 2
 -4 5 -17 2586.16 435.27 2
 4 5 -16 3160.98 576.057 2
 -4 5 -16 3016.89 448.443 2
 4 5 -15 2999.66 549.931 2
 -4 5 -15 2258.16 386.457 2
 -4 5 -14 1297.99 292.777 2
 4 5 -14 1299.86 341.046 2
 4 5 -13 23011.5 1410.74 2
 -4 5 -13 22871.3 1139.77 2
 4 5 -12 1816.75 402.283 2
 -4 5 -12 1010.37 230.89 2
 4 5 -11 26624.1 1461.55 2
 -4 5 -11 23860.9 1064.05 2
 -4 5 -10 5627.33 500.692 2
 4 5 -10 6263.1 706.639 2
 -4 5 -9 2453.09 316.85 2
 4 5 -9 2312.23 404.918 2
 -4 5 -8 3830.2 382.752 2
 4 5 -8 4414.74 563.818 2
 -4 5 -7 9781 576.38 2
 4 5 -7 10567.6 850.025 2
 4 5 -6 2111 386.857 2
 -4 5 -6 2364.07 268.98 2
 -4 5 -5 11963.7 585.129 2
 4 5 -5 11246.8 848.149 2
 -4 -5 -5 12921.6 784.124 1
 -4 5 -4 11425.3 556.418 2
 4 5 -4 9560.74 757.666 2
 -4 -5 -4 11548 742.391 1
 -4 5 -3 3614.25 309.663 2
 4 5 -3 4621.16 527.584 2
 -4 -5 -3 4476.82 462.117 1
 4 5 -2 2182.54 364.892 2
 -4 5 -2 1895.27 215.518 2
 -4 -5 -2 2264.12 340.929 1
 4 5 -1 10012.3 765.883 2
 -4 -5 -1 11624.3 748.077 1
 -4 -5 0 106.445 94.5104 1
 -4 -5 1 11322.5 763.014 1
 -4 -5 2 2247.41 350.53 1
 -4 -5 3 4459.88 493.152 1
 -4 5 6 1784.32 156.084 1
 4 6 -22 678.581 297.537 2
 -4 6 -21 176.644 94.0125 2
 4 6 -21 729.16 307.876 2
 4 6 -20 1059.73 362.625 2
 -4 6 -20 1120.06 311.307 2
 4 6 -19 1185.75 382.118 2
 -4 6 -19 929.188 294.403 2
 -4 6 -18 8.83934 74.7546 2
 4 6 -18 80.7089 128.582 2
 -4 6 -17 3241.58 505.446 2
 4 6 -17 2888.78 580.582 2
 -4 6 -16 582.156 203.468 2
 4 6 -16 503.22 237.6 2
 -4 6 -15 1275.13 314.27 2
 4 6 -15 1522.88 389.768 2
 4 6 -14 2966.07 555.968 2
 -4 6 -14 3299.85 458.778 2
 4 6 -13 7941.82 868.16 2
 -4 6 -13 7777.62 680.515 2
 -4 6 -12 806.146 223.294 2
 4 6 -12 575.772 271.818 2
 -4 6 -11 1231.27 264.684 2
 4 6 -11 1239.46 336.57 2
 4 6 -10 5371.35 682.477 2
 -4 6 -10 4693.17 490.885 2
 -4 6 -9 1194.6 234.129 2
 4 6 -9 1341.33 339.139 2
 -4 6 -8 7156.43 556.216 2
 4 6 -8 8031.52 794.701 2
 -4 6 -7 15518.3 791.293 2
 4 6 -7 16405.3 1125.9 2
 4 6 -6 210.021 128.588 2
 -4 6 -6 178.285 90.9654 2
 4 6 -5 12716.9 959.512 2
 -4 6 -5 11822.3 652.67 2
 -4 -6 -5 11990.3 793.914 1
 -4 -6 -4 7901.44 641.871 1
 -4 6 -4 8649.07 553.293 2
 4 6 -4 8329.11 767.804 2
 -4 6 -3 1224.3 205.511 2
 4 6 -3 1519.89 337.813 2
 -4 -6 -3 1871.32 321.667 1
 -4 6 -2 426.652 120.071 2
 4 6 -2 394.498 160.05 2
 -4 -6 -2 390.575 173.818 1
 -4 6 -1 2547.53 285.138 2
 -4 -6 -1 2249.12 351.933 1
 4 6 -1 3181.83 458.453 2
 -4 -6 0 15818.9 936.34 1
 -4 -6 1 2428.66 380.122 1
 -4 -6 2 344.811 178.332 1
 -4 -6 3 1669.24 345.562 1
 -4 6 7 12808.6 445.21 1
 -4 6 8 5730.77 354.01 1
 -4 6 9 983.289 168.24 1
 4 7 -20 261.75 237.148 2
 4 7 -19 189.026 186.821 2
 -4 7 -19 0.84934 97.9144 2
 -4 7 -18 241.571 165.755 2
 4 7 -18 104.487 171.393 2
 -4 7 -17 656.018 224.228 2
 4 7 -17 1001.65 361.982 2
 -4 7 -16 329.997 145.506 2
 4 7 -16 1196.26 400.315 2
 -4 7 -15 85.3673 137.933 2
 4 7 -15 25.3347 103.597 2
 -4 7 -14 238.252 144.858 2
 4 7 -14 158.153 161.684 2
 -4 7 -13 541.434 197.373 2
 4 7 -13 429.835 213.915 2
 -4 7 -12 690.298 215.26 2
 4 7 -12 555.375 233.168 2
 -4 7 -11 361.311 164.075 2
 4 7 -11 341.612 212.352 2
 4 7 -10 495.268 238.921 2
 -4 7 -10 514.477 180.169 2
 -4 7 -9 7120.41 605.603 2
 4 7 -9 7780.67 837.245 2
 -4 7 -8 223.934 124.524 2
 4 7 -8 518.842 223.935 2
 -4 7 -7 5865.2 533.696 2
 4 7 -7 6582.46 748.489 2
 4 7 -6 308.706 182.673 2
 -4 7 -6 403.531 148.613 2
 -4 -7 -5 4136.36 497.173 1
 -4 7 -5 3665.67 406.384 2
 4 7 -5 4323.64 594.591 2
 -4 -7 -4 3518.52 450.007 1
 -4 7 -4 3873.83 408.456 2
 4 7 -4 4763.75 620.562 2
 -4 -7 -3 2921.96 416.52 1
 -4 7 -3 2608.03 325.908 2
 4 7 -3 3281.03 529.339 2
 4 7 -2 3857.12 550.557 2
 -4 -7 -2 4245.36 505.935 1
 -4 7 -2 3678.65 399.36 2
 4 7 -1 4290.64 587.389 2
 -4 7 -1 3387.64 374.736 2
 -4 -7 -1 3730.99 484.686 1
 4 7 0 605.232 216.371 2
 -4 -7 0 926.696 256.134 1
 -4 -7 1 4059.44 510.613 1
 4 -7 1 2258.69 156.588 1
 -4 -7 2 3472.49 482.769 1
 -4 -7 3 3529.51 493.133 1
 -4 -7 4 3598.46 510.724 1
 4 8 -19 357.116 247.213 2
 4 8 -18 24.8985 125.072 2
 4 8 -17 576.277 253.028 2
 -4 8 -16 161.43 165.462 2
 4 8 -16 775.197 320.49 2
 -4 8 -15 308.595 187.014 2
 4 8 -15 717.258 330.659 2
 4 8 -14 714.042 315.684 2
 -4 8 -14 597.64 208.055 2
 4 8 -13 773.079 293.991 2
 -4 8 -13 710.731 234.294 2
 -4 8 -12 567.34 216.878 2
 4 8 -12 1016.19 390.156 2
 4 8 -11 238.37 176.433 2
 -4 8 -11 348.197 139.355 2
 -4 8 -10 218.707 122.932 2
 4 8 -10 537.872 256.927 2
 -4 8 -9 3036.15 427.802 2
 4 8 -9 3068.95 559.823 2
 -4 8 -8 3959.65 473.025 2
 4 8 -8 4007.89 634.523 2
 4 8 -7 2090.85 451.34 2
 -4 8 -7 1731.85 312.799 2
 4 8 -6 627.511 286.438 2
 -4 8 -6 560.44 195.881 2
 -4 -8 -5 4932.17 565.849 1
 -4 8 -5 4662.42 497.311 2
 4 8 -5 4898.97 674.587 2
 4 8 -4 185.297 94.854 2
 -4 8 -4 79.2863 63.3619 2
 -4 -8 -4 388.162 174.59 1
 -4 8 -3 383.788 157.086 2
 -4 -8 -3 536.931 185.215 1
 4 8 -3 624.343 259.508 2
 -4 8 -2 1322.61 268.184 2
 4 8 -2 1398.08 373.948 2
 -4 -8 -2 906.241 275.637 1
 4 8 -1 3967.66 597.777 2
 -4 8 -1 3797.58 444.173 2
 -4 -8 -1 3372.39 481.106 1
 -4 -8 0 2056.12 378.163 1
 4 8 0 2796 496.398 2
 -4 -8 1 4223.16 552.206 1
 -4 -8 2 1229.2 322.496 1
 -4 -8 3 162.76 100.16 1
 -4 -8 4 197.694 155.165 1
 -4 -8 5 4698.36 623.563 1
 4 9 -17 1854.14 516.859 2
 4 9 -16 273.97 245.348 2
 4 9 -15 304.77 267.406 2
 4 9 -14 381.469 245.534 2
 4 9 -13 1177.13 368.481 2
 -4 9 -12 994.228 265.773 2
 4 9 -12 1038.72 348.646 2
 -4 9 -11 962.154 251.606 2
 4 9 -11 1332.41 395.635 2
 4 9 -10 1225.9 374.616 2
 -4 9 -10 1500.63 325.184 2
 -4 9 -9 1100.24 279.443 2
 4 9 -9 1419.23 396.787 2
 4 9 -8 474.962 221.409 2
 -4 9 -8 161.451 96.512 2
 -4 9 -7 6060.03 620.604 2
 4 9 -7 7504.44 905.909 2
 4 9 -6 -75.5802 90.1778 2
 -4 9 -6 64.2747 84.1733 2
 -4 9 -5 2140.1 380.679 2
 -4 -9 -5 2099.95 396.405 1
 4 9 -5 2933.1 554.86 2
 -4 -9 -4 3509.91 490.164 1
 -4 9 -4 3596.21 468.765 2
 4 9 -4 3694.31 616.649 2
 4 9 -3 1021.18 300.594 2
 -4 -9 -3 1377.74 315.358 1
 -4 9 -3 1017.48 252.351 2
 -4 -9 -2 5987.82 670.623 1
 -4 9 -2 5202.66 563.606 2
 4 9 -2 7272.98 869.308 2
 -4 -9 -1 2930.94 473.23 1
 -4 9 -1 3061.53 438 2
 4 9 -1 3483.39 590.219 2
 -4 9 0 274.542 136.305 2
 -4 -9 0 423.341 218.727 1
 4 9 0 496.493 221.752 2
 4 9 1 2950.94 533.059 2
 -4 -9 1 3202.86 501.507 1
 -4 -9 2 5713.01 685.28 1
 -4 -9 3 1001.61 303.535 1
 -4 -9 4 2757.44 499.829 1
 -4 -9 5 3355.52 550.493 1
 -4 -9 6 374.965 185.878 1
 -4 -9 7 6437.53 796.354 1
 4 10 -15 689.571 339.137 2
 4 10 -14 1043.42 373.907 2
 4 10 -13 1710.46 510.901 2
 4 10 -12 301.832 217.446 2
 4 10 -11 2214.16 525.871 2
 4 10 -10 5066.94 789.444 2
 4 10 -9 265.963 233.298 2
 -4 10 -8 11.6832 55.3067 2
 4 10 -8 191.032 189.424 2
 4 10 -7 1176.93 381.484 2
 -4 10 -7 1273.75 305.988 2
 4 10 -6 21.5498 146.407 2
 -4 10 -6 98.0495 113.473 2
 4 10 -5 281.883 247.182 2
 -4 10 -5 583.656 217.24 2
 -4 -10 -5 738.568 240.374 1
 -4 -10 -4 2048.38 387.303 1
 4 10 -4 2621.06 557.864 2
 -4 10 -4 2524.24 421.045 2
 -4 10 -3 84.8134 86.871 2
 -4 -10 -3 -54.831 67.9395 1
 4 10 -2 3051.63 605.84 2
 -4 10 -2 3063.02 468.466 2
 -4 -10 -2 3280.08 512.561 1
 -4 -10 -1 2373.48 442.725 1
 4 10 -1 2905.26 588.924 2
 -4 10 -1 2405.04 439.814 2
 -4 -10 0 744.281 266.161 1
 -4 10 0 454.554 177.84 2
 4 10 0 863.335 323.894 2
 -4 -10 1 2559.75 465.03 1
 4 10 1 2767.08 585.491 2
 -4 10 1 1978.07 370.773 2
 4 10 2 2951.59 567.429 2
 -4 -10 2 3966.11 596.054 1
 -4 -10 3 11.1062 95.222 1
 -4 -10 4 2791.78 513.702 1
 -4 -10 5 917.97 313.336 1
 -4 -10 6 2.42061 134.926 1
 -4 -10 7 1707.61 418.659 1
 -4 -10 8 398.952 208.307 1
 4 11 -13 337.32 229.305 2
 4 11 -12 -116.85 238.717 2
 4 11 -11 195.794 238.284 2
 4 11 -10 1044.37 374.305 2
 4 11 -9 224.067 182.131 2
 4 11 -8 1159.93 403.713 2
 4 11 -7 2176.86 543.322 2
 4 11 -6 620.639 316.432 2
 4 11 -5 1056.7 395.78 2
 4 11 -4 1589.06 480.218 2
 -4 -11 -4 1954.32 406.129 1
 -4 -11 -3 831.562 261.293 1
 -4 11 -3 486.121 200.449 2
 -4 -11 -2 967.508 290.08 1
 4 11 -2 1618.34 460.684 2
 -4 11 -2 1073.51 312.154 2
 4 11 -1 709.536 295.834 2
 -4 11 -1 797.599 274.518 2
 -4 -11 -1 305.717 166.502 1
 -4 11 0 185.941 144.44 2
 4 11 0 206.816 184.569 2
 -4 -11 0 147.198 117.414 1
 4 11 1 711.046 269.48 2
 -4 11 1 800.83 260.472 2
 -4 -11 1 437.873 164.639 1
 -4 -11 2 1259.13 361.819 1
 4 11 2 960.494 365.106 2
 -4 11 2 875.502 255.318 2
 -4 -11 3 1181.89 360.079 1
 -4 -11 4 1262.41 366.932 1
 -4 -11 5 945.765 322.059 1
 -4 -11 6 373.191 243.228 1
 -4 -11 7 1195.44 363.766 1
 -4 -11 8 1385.23 417.059 1
 -4 -11 9 675.033 261.661 1
 -4 -11 10 1902.11 517.704 1
 4 12 -9 351.184 192.728 2
 4 12 -8 92.3148 172.648 2
 4 12 -7 202.36 183.235 2
 4 12 -6 265.579 249.124 2
 4 12 -5 553.825 312.366 2
 4 12 -4 282.403 247.827 2
 4 12 -3 466.782 309.322 2
 4 12 -2 187.899 136.093 2
 4 12 -1 607.113 318.562 2
 4 12 0 290.916 304.82 2
 4 12 1 345.001 239.009 2
 4 12 2 153.461 103.029 2
 4 12 3 680.679 346.789 2
 4 12 4 541.103 311.904 2
 -4 -12 7 198.875 215.804 1
 -4 -12 8 259.503 229.314 1
 -4 -12 9 447.527 260.51 1
 5 0 -24 -38.884 117.968 2
 5 0 -23 -144.949 152.751 2
 5 0 -22 -15.107 114.983 2
 5 0 -21 10.5289 154.361 2
 5 0 -20 -123.84 124.765 2
 5 0 -19 -55.4708 127.943 2
 5 0 -18 161.859 169.418 2
 5 0 -17 82.2505 293.356 2
 5 0 -16 -21.2781 100.954 2
 5 0 -15 48.2157 145.675 2
 5 0 -14 -65.3656 74.7094 2
 5 0 -13 530.168 289.498 2
 5 0 -12 -94.016 144.282 2
 5 0 -11 83.8988 113.217 2
 5 0 -10 -13.1632 65.8461 2
 5 0 -9 381.531 324.981 2
 5 0 -8 222.464 120.658 2
 5 0 -7 77.7525 102.79 2
 5 0 -6 -39.75 77.3905 2
 5 0 -5 -57.9482 78.4897 2
 5 0 -4 116.601 85.4348 2
 5 0 -3 -30.9758 42.0494 2
 5 0 -2 34.456 56.0724 2
 -5 0 -2 71.0603 90.2851 1
 5 0 -1 126.471 67.6957 2
 -5 0 -1 -76.4473 66.8089 1
 -5 0 0 44.9849 56.2281 1
 5 0 0 49.6588 45.6168 2
 5 0 0 5.32177 47.8514 1
 5 0 1 -17.1961 37.0765 2
 -5 0 1 165.128 64.8764 2
 5 0 1 271.443 106.502 1
 -5 0 1 238.792 87.0001 1
 5 0 2 -15.974 48.7925 1
 -5 0 2 -46.0372 54.4065 2
 -5 0 2 22.0143 63.521 1
 -5 0 3 -14.4869 56.47 2
 -5 0 4 56.7643 91.4621 2
 5 0 6 13.9637 42.4468 2
 5 0 7 -18.4359 63.0589 2
 5 -1 -24 357.9 240.721 2
 5 1 -24 151.445 112.714 2
 5 1 -23 672.541 300.402 2
 5 -1 -23 988.994 360.667 2
 5 -1 -22 1285.65 382.162 2
 5 1 -22 792.804 287.332 2
 5 -1 -21 1181.3 374.457 2
 5 1 -21 1233.75 390.549 2
 5 -1 -20 812.818 321.451 2
 5 1 -20 986.159 322.21 2
 5 -1 -19 689.57 311.307 2
 5 1 -19 438.736 268.606 2
 5 1 -18 3072.28 551.006 2
 5 -1 -18 3067.49 546.351 2
 5 -1 -17 1121.22 332.749 2
 5 1 -17 1137.38 366.052 2
 5 1 -16 933.207 275.973 2
 5 -1 -16 1258.44 310.271 2
 5 1 -15 3998.65 605.203 2
 5 -1 -15 4014.48 590.809 2
 5 1 -14 4066.97 566.107 2
 5 -1 -14 4097.67 554.007 2
 5 -1 -13 511.768 221.458 2
 5 1 -13 652.898 272.721 2
 5 1 -12 2483.87 416.61 2
 5 -1 -12 2786.43 426.501 2
 5 -1 -11 1638.62 326.525 2
 5 1 -11 1144.3 286.132 2
 5 1 -10 3121.73 442.126 2
 5 -1 -10 2755.14 399.844 2
 5 1 -9 7120.22 637.388 2
 5 -1 -9 7541.95 634.596 2
 5 -1 -8 7104.28 572.748 2
 5 1 -8 6518.79 581.812 2
 5 1 -7 13495.6 805.898 2
 5 -1 -7 12217.7 716.543 2
 5 -1 -6 20923.3 866.248 2
 5 1 -6 22426 987.609 2
 5 -1 -5 4780.71 400.621 2
 5 1 -5 4887.9 445.214 2
 5 -1 -4 2323.82 262.523 2
 5 1 -4 2681.77 315.765 2
 -5 -1 -3 10180.1 585.498 1
 5 1 -3 11219.5 620.328 2
 5 -1 -3 10805 514.118 2
 5 -1 -2 5196.52 329.38 2
 5 1 -2 5147.34 410.265 2
 -5 -1 -2 4611.91 396.081 1
 -5 1 -1 44201.2 1017.11 1
 5 1 -1 45279.3 1141.6 2
 -5 -1 -1 44059.6 1213.2 1
 5 -1 -1 45231.9 836.439 2
 5 -1 0 2778.52 184.428 2
 5 -1 0 2473.44 257.549 1
 -5 -1 0 3102.38 326.299 1
 -5 1 0 2557.04 248.273 1
 5 1 0 2994.33 289.317 2
 5 -1 1 43681 660.826 2
 -5 -1 1 44366.9 1217.09 1
 -5 1 1 43090.8 841.743 2
 5 -1 1 43164.4 1118.87 1
 -5 1 1 44281.5 1017.98 1
 -5 1 2 4951.39 333.225 2
 -5 -1 2 5118.09 421.951 1
 -5 1 2 5363.37 360.134 1
 5 -1 2 4875.24 392.301 1
 5 -1 2 5033.64 214.42 2
 -5 -1 2 4721.84 392.727 2
 -5 1 3 10938.1 544.565 2
 -5 1 3 10487.3 523.639 1
 5 -1 3 10451.2 600.252 1
 -5 -1 3 10058.2 608.684 2
 -5 1 4 2435.88 285.491 2
 5 -1 4 2602.93 196.145 2
 -5 1 5 4539.87 425.184 2
 5 -1 5 4909.22 309.306 2
 5 -1 6 22540.1 753.185 2
 5 -1 7 11524.2 604.037 2
 5 -1 8 6353.58 482.378 2
 5 2 -24 696.454 323.851 2
 5 -2 -24 498.417 271.391 2
 5 2 -23 393.953 255.803 2
 5 -2 -23 -128.57 191.205 2
 5 -2 -22 577.626 206.463 2
 5 2 -22 1095.94 370.428 2
 5 -2 -21 2253.93 509.214 2
 5 2 -21 2139.34 500.529 2
 5 2 -20 3131.44 610.572 2
 5 -2 -20 3665.46 628.807 2
 5 2 -19 923.648 334.311 2
 5 -2 -19 758.785 306.959 2
 5 -2 -18 4631.68 667.109 2
 5 2 -18 5167.12 721.57 2
 5 -2 -17 892.834 302.789 2
 5 2 -17 1082.14 324.2 2
 5 2 -16 279.377 188.023 2
 5 -2 -16 94.5419 105.929 2
 -5 2 -16 440.489 178.263 2
 5 -2 -15 399.803 201.391 2
 5 2 -15 518.599 228.407 2
 -5 2 -15 310.016 145.328 2
 5 2 -14 6172.68 720.192 2
 -5 2 -14 7367.93 639.57 2
 5 -2 -14 7231.96 733.962 2
 5 -2 -13 2296.48 401.332 2
 5 2 -13 1918.11 397.505 2
 -5 2 -13 2063.17 329.857 2
 -5 2 -12 10564.4 691.04 2
 5 2 -12 9241.02 827.863 2
 5 -2 -12 10121.5 796.318 2
 5 2 -11 8047.71 750.817 2
 5 -2 -11 7836.27 675.942 2
 -5 2 -11 8671.27 590.855 2
 5 2 -10 2826.58 425.946 2
 -5 2 -10 4018.8 394.325 2
 5 -2 -10 3119.29 414.42 2
 5 2 -9 13141.5 880.399 2
 -5 2 -9 14293.5 668.727 2
 5 -2 -9 14064 823.846 2
 5 2 -8 2454.85 374.819 2
 5 -2 -8 2583.86 331.461 2
 5 2 -7 2844.03 404.243 2
 5 -2 -7 3206.18 360.683 2
 5 -2 -6 16521.3 770.013 2
 5 2 -6 15802.7 879.803 2
 5 -2 -5 849.056 171.292 2
 5 2 -5 878.517 213.692 2
 5 2 -4 6276.51 529.755 2
 5 -2 -4 6047.86 400.945 2
 -5 -2 -4 5239.55 451.168 1
 5 2 -3 16093.5 811.727 2
 5 -2 -3 14572.3 558.842 2
 -5 -2 -3 14876.2 754.495 1
 -5 -2 -2 2310.09 297.132 1
 5 2 -2 1896.16 265.074 2
 5 -2 -2 1972.34 182.915 2
 5 -2 -1 8885.71 323.453 2
 -5 -2 -1 8304.56 558.38 1
 5 2 -1 9515.94 594.697 2
 -5 2 0 407.559 93.0877 1
 5 -2 0 464.874 102.697 1
 5 2 0 719.538 173.955 2
 -5 -2 0 398.873 135.127 1
 -5 2 1 8546.92 342.185 2
 -5 -2 1 9738.05 630.905 1
 5 -2 1 7972.35 430.463 1
 -5 2 1 8293.14 385.412 1
 5 -2 2 1955.8 227.629 1
 -5 2 2 2060.61 200.973 2
 -5 -2 2 2337.82 327.818 1
 -5 2 2 2585.81 220.238 1
 -5 2 3 14823.3 547.158 1
 -5 2 3 14896.5 616.902 2
 5 -2 3 14507.7 663.922 1
 5 -2 4 5374.23 438.253 1
 -5 2 4 6116.6 443.746 2
 5 -2 4 5354.37 227.184 2
 5 -2 5 1145.91 132.42 2
 -5 2 5 1099 208.28 2
 5 -2 6 17066 593.423 2
 5 -2 7 2228.46 248.052 2
 5 -2 8 3184.92 328.671 2
 5 3 -23 -13.9713 115.557 2
 5 3 -22 1386.62 440.042 2
 5 3 -21 3321.58 646.271 2
 5 3 -20 616.767 295.062 2
 -5 3 -20 503.806 227.414 2
 -5 3 -19 1676.93 360.717 2
 5 3 -19 1823.47 444.998 2
 5 -3 -19 1202.55 364.822 2
 -5 3 -18 1352.34 320.628 2
 5 3 -18 876.451 311.434 2
 5 -3 -18 1461.37 377.675 2
 -5 3 -17 368.454 190.81 2
 5 -3 -17 323.369 189.067 2
 5 3 -17 746.99 256.025 2
 -5 3 -16 5089.6 573.259 2
 5 3 -16 4931.08 690.632 2
 5 -3 -16 4228.16 607.851 2
 5 -3 -15 1414.54 358.893 2
 -5 3 -15 1752.82 330.427 2
 5 3 -15 1526.87 404.883 2
 5 -3 -14 2598.33 443.237 2
 5 3 -14 2156.53 437.877 2
 -5 3 -14 2554.78 374.151 2
 5 -3 -13 637.591 234.69 2
 -5 3 -13 612.918 174.398 2
 5 3 -13 95.0038 126.943 2
 5 3 -12 3919.46 566.856 2
 5 -3 -12 3663.69 487.67 2
 -5 3 -12 4376.56 440.503 2
 5 -3 -11 8094.49 693.021 2
 5 3 -11 8210.27 775.319 2
 -5 3 -11 7581.69 552.314 2
 5 3 -10 5207.62 590.599 2
 -5 3 -10 5007.94 421.014 2
 5 -3 -10 5821.57 564.531 2
 5 3 -9 2636.85 418.372 2
 5 -3 -9 2421.99 361.288 2
 -5 3 -9 2730.91 295.312 2
 -5 3 -8 10988.8 534.546 2
 5 3 -8 10823.4 820.321 2
 5 -3 -8 10872.6 708.327 2
 -5 3 -7 14611.5 560.645 2
 5 -3 -7 15545.3 798.772 2
 5 3 -7 14812.2 927.655 2
 5 3 -6 14386.5 889.4 2
 5 -3 -6 15532.6 755.011 2
 -5 3 -6 13811.4 483.897 2
 -5 3 -5 17365.3 463.71 2
 -5 -3 -5 19561.8 936.629 1
 5 3 -5 18738.3 1009.45 2
 -5 -3 -4 5371.66 520.966 1
 5 3 -4 4608.85 480.669 2
 5 3 -3 16623.6 893.527 2
 -5 -3 -3 13722.6 772.63 1
 5 3 -2 16465.6 873.701 2
 -5 -3 -2 14518.6 787.699 1
 5 3 -1 32067.1 1192.44 2
 -5 -3 -1 30319.3 1137.07 1
 5 3 0 6527.09 522.756 2
 -5 3 0 5671.18 238.763 2
 5 -3 0 6300.56 315.522 1
 -5 -3 0 6884.43 554.407 1
 -5 3 1 27650 642.538 2
 -5 -3 1 31007.3 1180.37 1
 5 -3 1 29373.8 744.819 1
 -5 3 2 16501.8 446.777 1
 -5 3 2 16515.9 581.448 2
 -5 -3 2 18650.7 925.62 1
 5 -3 2 16756.8 621.056 1
 -5 3 3 14952.6 629.992 2
 5 -3 3 14431.8 637.457 1
 -5 -3 3 15364.5 857.893 1
 -5 3 3 14892.6 450.057 1
 -5 3 4 4400.68 376.652 2
 -5 3 5 18350.3 848.421 2
 5 -3 5 17626 502.422 2
 5 -3 6 13624.6 529.102 2
 5 -3 7 14561.6 616.386 2
 5 -3 8 10588.6 583.614 2
 5 -3 9 3211.35 358.599 2
 5 4 -23 336.872 251.661 2
 -5 4 -23 -69.4414 83.7978 2
 5 4 -22 666.426 322.398 2
 -5 4 -22 300.831 167.539 2
 5 4 -21 546.449 248.976 2
 -5 4 -21 694.182 256.676 2
 -5 4 -20 320.375 189.735 2
 5 4 -20 150.478 108.118 2
 -5 4 -19 721.248 252.344 2
 5 4 -19 586.585 261.098 2
 5 4 -18 1720.59 448.232 2
 -5 4 -18 1177.45 301.584 2
 -5 4 -17 91.5022 90.608 2
 5 4 -17 354.098 248.595 2
 5 4 -16 176.109 188.044 2
 -5 4 -16 52.9005 55.3307 2
 -5 4 -15 1462.1 297.984 2
 5 4 -15 1448.46 438.407 2
 -5 4 -14 800.603 207.399 2
 5 4 -14 452.491 245.473 2
 -5 4 -13 127.019 96.1764 2
 5 4 -13 318.102 169.94 2
 5 4 -12 6616.51 736.89 2
 -5 4 -12 6960.14 563.429 2
 -5 4 -11 931.709 210.895 2
 5 4 -11 1705.97 379.724 2
 -5 4 -10 1305.18 245.647 2
 5 4 -10 578.9 175.622 2
 5 4 -9 11672.3 917.31 2
 -5 4 -9 10549.5 588.524 2
 5 4 -8 5040.31 585.287 2
 -5 4 -8 4734.83 371.53 2
 -5 4 -7 1665.24 201.488 2
 5 4 -7 1637.75 325.542 2
 -5 4 -6 11672.6 478.659 2
 5 4 -6 12172.2 880.451 2
 5 4 -5 1915.62 344.817 2
 -5 4 -5 2027.35 185.915 2
 -5 -4 -5 2321.99 343.139 1
 -5 -4 -4 9056.35 660.039 1
 -5 4 -4 8374.86 339.494 2
 5 4 -4 8773.55 714.26 2
 5 4 -3 1258.4 267.845 2
 -5 4 -3 882.426 99.1295 2
 -5 -4 -3 1241.3 244.556 1
 5 4 -2 923.994 243.164 2
 -5 -4 -2 734.989 212.016 1
 -5 4 -2 864.658 113.679 2
 5 4 -1 10306.1 748.976 2
 -5 -4 -1 8767.45 657.471 1
 -5 4 -1 7642.87 305.626 2
 5 -4 0 3391.47 181.334 1
 -5 -4 0 4709.59 483.571 1
 5 4 0 3923.76 445.162 2
 -5 4 0 3980.55 247.907 2
 5 -4 1 8399.8 354.756 1
 -5 4 1 8275.56 399.419 2
 5 -4 2 913.444 147.895 1
 -5 -4 2 591.356 183.347 1
 -5 4 2 703.058 135.654 2
 -5 -4 3 1071.74 256.058 1
 -5 4 3 1233.11 197.428 2
 -5 4 4 7661.85 250.87 1
 -5 4 4 8570.22 561.577 2
 5 -4 6 11498.4 507.746 2
 5 -4 7 1368.81 194.707 2
 5 -4 8 4229.85 377.251 2
 5 5 -22 129.168 156.814 2
 5 5 -21 210.176 241.363 2
 -5 5 -21 577.722 269.486 2
 5 5 -20 306.996 214.173 2
 -5 5 -20 67.8625 82.8205 2
 -5 5 -19 337.207 135.306 2
 5 5 -19 271.842 252.089 2
 -5 5 -18 671.89 236.316 2
 5 5 -18 1167.79 417.21 2
 -5 5 -17 79.5196 104.562 2
 5 5 -17 -36.6691 119.017 2
 -5 5 -16 175.329 105.166 2
 5 5 -16 367.247 222.486 2
 -5 5 -15 275.799 148.252 2
 5 5 -15 483.523 278.199 2
 -5 5 -14 -84.3654 56.9178 2
 5 5 -14 224.947 204.598 2
 5 5 -13 1597.42 429.953 2
 -5 5 -13 1004.86 230.831 2
 5 5 -12 2661.23 484.811 2
 -5 5 -12 2741.36 366.191 2
 5 5 -11 6912.71 758.783 2
 -5 5 -11 5934.75 518.585 2
 5 5 -10 1373.97 348.901 2
 -5 5 -10 2238.45 311.377 2
 -5 5 -9 276.169 91.6306 2
 5 5 -9 254.523 192.574 2
 -5 5 -8 396.373 111.847 2
 5 5 -8 497.727 208.184 2
 -5 5 -7 1995.05 242.471 2
 5 5 -7 2516.01 436.742 2
 -5 5 -6 5181.41 370.85 2
 5 5 -6 5784.2 639.651 2
 5 5 -5 345.816 207.246 2
 -5 -5 -5 435.496 164.477 1
 -5 5 -5 241.525 76.9131 2
 5 5 -4 1970.1 370.934 2
 -5 5 -4 1769.88 195.207 2
 -5 -5 -4 2405.55 360.463 1
 5 5 -3 902.354 252.758 2
 -5 5 -3 832.018 135.253 2
 -5 -5 -3 1083.76 245.356 1
 5 5 -2 411.76 170.079 2
 -5 -5 -2 558.305 185.065 1
 -5 -5 -1 2411.27 359.93 1
 -5 5 -1 2206.22 213.677 2
 5 5 -1 3325.77 457.786 2
 5 5 0 90.1982 107.225 2
 -5 -5 0 -34.1913 84.6753 1
 -5 5 1 2253.21 244.411 2
 5 -5 1 1850.72 140.09 1
 -5 5 2 846.857 161.561 2
 5 -5 2 913.99 136.142 1
 -5 -5 2 1308.08 287.473 1
 -5 5 3 684.703 159.369 2
 -5 -5 3 1068.99 278.828 1
 -5 -5 4 2254.93 390.755 1
 5 -5 8 219.851 92.143 2
 5 6 -21 238.24 237.885 2
 5 6 -20 1137.72 406.684 2
 5 6 -19 631.712 322.145 2
 -5 6 -18 244.757 159.522 2
 5 6 -18 384.896 236.083 2
 -5 6 -17 649.741 213.465 2
 5 6 -17 1830.26 498.481 2
 -5 6 -16 463.427 170.839 2
 5 6 -16 246.086 154.889 2
 5 6 -15 4026.76 669.606 2
 -5 6 -15 3298.02 461.836 2
 -5 6 -14 766.78 221.688 2
 5 6 -14 692.543 310.631 2
 -5 6 -13 972.501 241.472 2
 5 6 -13 1344.84 367.94 2
 5 6 -12 10780.2 1012.78 2
 -5 6 -12 8746.46 664.155 2
 5 6 -11 8507.21 893.291 2
 -5 6 -11 6972.3 576.066 2
 -5 6 -10 1652.37 265.988 2
 5 6 -10 1869.52 407.612 2
 -5 6 -9 13425.2 741.645 2
 5 6 -9 13673.5 1081.27 2
 -5 6 -8 1353.61 229.355 2
 5 6 -8 1290.89 335.452 2
 -5 6 -7 5704.81 440.616 2
 5 6 -7 7224.32 782.018 2
 -5 -6 -6 4877.24 539.945 1
 -5 6 -6 4494.95 378.748 2
 5 6 -6 4366.59 585.223 2
 5 6 -5 950.239 292.086 2
 -5 -6 -5 606.56 219.273 1
 -5 6 -5 714.224 158.01 2
 -5 6 -4 4644.47 366.825 2
 5 6 -4 5031.98 610.837 2
 -5 -6 -4 5200.7 557.568 1
 -5 -6 -3 3891.02 481.153 1
 -5 6 -3 3718.75 323.932 2
 5 6 -3 3977.36 558.188 2
 5 6 -2 980.019 272.747 2
 -5 -6 -2 1168.47 265.45 1
 -5 6 -2 1471.47 210.973 2
 -5 -6 -1 7120.18 649.901 1
 -5 6 -1 6918.99 447.256 2
 5 6 -1 7868.43 755.779 2
 5 6 0 852.976 233.491 2
 -5 -6 0 818.465 236.575 1
 -5 -6 1 9365.4 777.969 1
 -5 -6 2 986.428 245.751 1
 -5 -6 3 3831.23 518.953 1
 -5 -6 4 5960.82 648.703 1
 -5 6 7 3341.49 159.362 1
 -5 6 8 999.917 129.63 1
 5 7 -20 319.18 239.615 2
 5 7 -19 518.017 239.795 2
 5 7 -18 -97.553 174.118 2
 5 7 -17 351.316 201.987 2
 5 7 -16 500.716 257.991 2
 5 7 -15 2531.93 547.05 2
 -5 7 -14 926.319 249.478 2
 5 7 -14 1246.01 406.327 2
 -5 7 -13 2877.83 408.5 2
 5 7 -13 3725.99 642.951 2
 5 7 -12 1857.15 449.647 2
 -5 7 -12 968.867 242.655 2
 -5 7 -11 807.947 215.712 2
 5 7 -11 792.379 300.756 2
 -5 7 -10 619.741 193.383 2
 5 7 -10 237.458 165.9 2
 -5 7 -9 11006.5 723.029 2
 5 7 -9 14238.6 1165.04 2
 -5 7 -8 9946.61 657.103 2
 5 7 -8 11253 1033.51 2
 -5 7 -7 7584.83 563.163 2
 5 7 -7 8436.15 886.259 2
 -5 -7 -6 8361.39 740.39 1
 -5 7 -6 8322.35 576.201 2
 5 7 -6 9757.52 943.916 2
 -5 -7 -5 7939.47 706.349 1
 -5 7 -5 6866.37 508.939 2
 5 7 -5 9546.3 914.406 2
 -5 7 -4 5267.72 452.006 2
 5 7 -4 6040.08 721.291 2
 -5 -7 -4 5704.23 606.328 1
 -5 -7 -3 18263.4 1095.5 1
 -5 7 -3 17216.8 799.543 2
 5 7 -3 17929.9 1237.46 2
 5 7 -2 2531.31 486.582 2
 -5 7 -2 2548.32 310.038 2
 -5 -7 -2 2868.84 425.179 1
 -5 7 -1 13026.6 703.437 2
 -5 -7 -1 15693 1024.82 1
 5 7 -1 16220.4 1157.69 2
 5 7 0 10481.9 927.378 2
 -5 -7 0 10353.3 838.006 1
 -5 -7 1 15551.5 1052.43 1
 -5 -7 2 3032.94 459.988 1
 -5 -7 3 22271.7 1296.07 1
 -5 -7 4 6547.46 718.897 1
 -5 -7 5 8011.18 792.748 1
 5 8 -19 301.274 229.369 2
 5 8 -18 677.692 319.867 2
 5 8 -17 1360.68 416.806 2
 5 8 -16 152.499 167.429 2
 5 8 -15 858.82 374.058 2
 5 8 -14 1226.08 415.526 2
 5 8 -13 1748.35 464.766 2
 5 8 -12 1781.46 461.63 2
 5 8 -11 789.782 312.268 2
 -5 8 -10 1283.17 279.124 2
 5 8 -10 1264.56 373.207 2
 -5 8 -9 5387.22 534.791 2
 5 8 -9 6704.05 830.61 2
 5 8 -8 1477.55 394.097 2
 -5 8 -8 1824.17 307.772 2
 5 8 -7 2813.24 551.231 2
 -5 8 -7 2062.96 314.162 2
 -5 8 -6 4308.2 448.987 2
 -5 -8 -6 5221.31 613.364 1
 5 8 -6 5828.05 772.001 2
 5 8 -5 3268.26 567.749 2
 -5 -8 -5 3026.55 458.686 1
 -5 8 -5 2629.82 349.57 2
 -5 -8 -4 2711.98 443.694 1
 5 8 -4 2671.91 520.49 2
 -5 8 -4 2552.77 351.104 2
 -5 8 -3 2488.29 339.726 2
 5 8 -3 3522.85 596.267 2
 -5 -8 -3 2708.03 440.492 1
 -5 8 -2 6529.04 547.08 2
 5 8 -2 7567.87 856.758 2
 -5 -8 -2 7555.61 741.773 1
 -5 -8 -1 10295.3 870.927 1
 -5 8 -1 9144.15 650.763 2
 5 8 -1 10935.6 1013.04 2
 5 8 0 3472.12 574.442 2
 -5 8 0 2724.78 357.085 2
 -5 -8 0 3122.16 486.477 1
 5 8 1 12410.9 1053.08 2
 -5 -8 1 12081.4 971.546 1
 -5 -8 2 8566.92 825.472 1
 -5 -8 3 2858.92 493.764 1
 -5 -8 4 2672.33 489.703 1
 -5 -8 5 3025.41 528.526 1
 -5 -8 6 5660.48 723.516 1
 5 9 -17 197.946 230.058 2
 5 9 -16 -387.911 246.438 2
 5 9 -15 414.146 258.669 2
 5 9 -14 137.726 156.057 2
 5 9 -13 1294.51 413.567 2
 5 9 -12 75.6813 126.333 2
 5 9 -11 813.559 332.346 2
 5 9 -10 1405.74 421.34 2
 5 9 -9 2045.85 497.809 2
 5 9 -8 290.843 208.666 2
 5 9 -7 1459.86 438.635 2
 -5 9 -7 564.666 174.656 2
 5 9 -6 2390.38 519.057 2
 -5 9 -6 1495.8 290.708 2
 -5 -9 -5 445.251 208.011 1
 5 9 -5 346.216 234.006 2
 -5 9 -5 333.672 142.153 2
 5 9 -4 635.063 242.515 2
 -5 9 -4 946.692 235.779 2
 -5 -9 -4 1445.25 327.854 1
 -5 9 -3 1614.94 304.662 2
 -5 -9 -3 1463.7 345.25 1
 5 9 -3 1990.41 478.353 2
 5 9 -2 2204.85 502.325 2
 -5 9 -2 2182.59 347.145 2
 -5 -9 -2 2246.81 422.158 1
 -5 9 -1 1436.48 291.109 2
 5 9 -1 1298.56 401.075 2
 -5 -9 -1 1987.55 405.928 1
 -5 -9 0 1091.33 311.912 1
 5 9 0 770.513 304.596 2
 -5 9 0 271.233 119.099 2
 -5 -9 1 1544.95 353.088 1
 5 9 1 1689.35 426.117 2
 -5 -9 2 2362.03 470.158 1
 -5 -9 3 2005.43 434.729 1
 -5 -9 4 750.635 266.089 1
 -5 -9 5 551.946 260.148 1
 -5 -9 6 2808.69 517.02 1
 -5 -9 7 930.37 326.785 1
 -5 -9 8 249.344 141.583 1
 5 10 -15 657.491 315.935 2
 5 10 -14 552.785 272.49 2
 5 10 -13 278.108 192.682 2
 5 10 -12 427.954 224.513 2
 5 10 -11 658.463 326.721 2
 5 10 -10 -157.909 169.91 2
 5 10 -9 -150.459 109.893 2
 5 10 -8 716.599 328.058 2
 5 10 -7 969.765 363.438 2
 5 10 -6 893.634 360.171 2
 5 10 -5 387.156 238.611 2
 -5 -10 -5 127.465 125.082 1
 5 10 -4 551.369 251.801 2
 -5 -10 -4 466.193 212.243 1
 -5 -10 -3 258.8 181.173 1
 5 10 -3 209.724 168.141 2
 -5 -10 -2 27.0163 101.401 1
 5 10 -2 286.577 192.873 2
 -5 10 -1 2.18107 64.9512 2
 5 10 -1 196.009 190.015 2
 -5 -10 -1 156.474 148.506 1
 -5 10 0 630.866 203.957 2
 -5 -10 0 482.499 242.974 1
 -5 -10 1 138.895 168.687 1
 5 10 1 -159.562 132.958 2
 -5 10 1 64.7171 97.0612 2
 -5 -10 2 287.192 225.348 1
 5 10 2 316.542 206.671 2
 -5 -10 3 558.756 257.663 1
 -5 -10 4 121.012 110.552 1
 -5 -10 5 287.402 121.098 1
 -5 -10 6 593.419 258.71 1
 -5 -10 7 813.01 320.739 1
 -5 -10 8 321.367 200.115 1
 -5 -10 9 72.3632 171.109 1
 5 11 -12 -152.978 153.185 2
 5 11 -11 408.92 280.565 2
 5 11 -10 1710.83 495.314 2
 5 11 -9 704.134 322.97 2
 5 11 -8 1750.15 505.141 2
 5 11 -7 1141.36 404.462 2
 5 11 -6 1057.56 418.205 2
 5 11 -5 1716.31 489.825 2
 5 11 -4 698.765 297.371 2
 -5 -11 -4 330.991 163.964 1
 5 11 -3 931.655 391.416 2
 -5 -11 -3 598.227 252.102 1
 5 11 -2 2317.14 558.177 2
 -5 -11 -2 1360.62 359.219 1
 5 11 -1 3904.29 746.588 2
 -5 -11 -1 2494.5 481.819 1
 5 11 0 -59.59 144.185 2
 -5 -11 0 207.227 108.889 1
 -5 -11 1 2156.34 470.926 1
 5 11 1 2194.7 563.693 2
 -5 -11 2 1819.62 427.75 1
 5 11 2 2386.29 579.012 2
 5 11 3 421.22 270.389 2
 -5 -11 3 385.531 204.357 1
 -5 -11 4 698.251 283.613 1
 -5 -11 5 1949.55 485.801 1
 -5 -11 6 1102.19 364.023 1
 -5 -11 7 234.783 156.816 1
 -5 -11 8 1820.89 498.926 1
 -5 -11 9 757.598 327.08 1
 -5 -11 10 2174.86 543.52 1
 -5 -11 11 720.988 360.802 1
 -5 -11 12 145.042 200.264 1
 5 12 -8 1062.93 433.114 2
 5 12 -7 -233.844 218.256 2
 5 12 -6 1648.62 518.467 2
 5 12 -5 422.045 275.58 2
 5 12 -4 -8.45449 100.515 2
 5 12 -3 728.483 357.629 2
 5 12 -2 92.1633 152.114 2
 5 12 -1 663.595 332.415 2
 5 12 0 2732.39 653.436 2
 5 12 1 1115.05 420.861 2
 -5 -12 2 318.473 239.59 1
 5 12 2 172.343 229.394 2
 -5 -12 3 439.936 241.962 1
 5 12 3 337.351 138.339 2
 -5 -12 4 415.407 251.96 1
 5 12 4 3.67018 172.024 2
 -5 -12 5 456.048 262.133 1
 -5 -12 6 1496.26 459.787 1
 -5 -12 7 229.48 192.233 1
 -5 -12 8 708.657 309.636 1
 6 0 -23 -42.1599 188.308 2
 6 0 -22 2357.21 529.98 2
 6 0 -21 2692.98 557.86 2
 6 0 -20 4091.07 668.177 2
 6 0 -19 890.242 315.926 2
 6 0 -18 392.588 221.449 2
 6 0 -17 718.734 238.975 2
 6 0 -16 993.026 317.128 2
 6 0 -15 16394.4 1199.05 2
 6 0 -14 13178.8 1036.84 2
 6 0 -13 7890.12 767.399 2
 6 0 -12 3056.5 476.404 2
 6 0 -11 10129.6 799.9 2
 6 0 -10 13015.6 874.692 2
 6 0 -9 2882.83 410.703 2
 6 0 -8 6092.16 563.963 2
 6 0 -7 1086.84 246.555 2
 6 0 -6 13856.8 775.324 2
 6 0 -5 12154.2 690.223 2
 6 0 -4 36093.6 1127.29 2
 -6 0 -3 7680.68 525.86 1
 6 0 -3 7497.28 492.416 2
 -6 0 -2 8249.54 526.153 1
 6 0 -2 9873.68 535.701 2
 -6 0 -1 33283.4 1062.52 1
 6 0 -1 33529.6 943.371 2
 6 0 0 1708.33 213.657 2
 -6 0 0 1797.07 255.984 1
 -6 0 1 35313.3 1106.5 1
 6 0 1 35005.6 886.4 2
 6 0 2 7937.65 407.185 2
 -6 0 2 8828.01 563.482 1
 -6 0 2 8321.44 505.964 2
 -6 0 3 7479.21 536.936 1
 -6 0 3 6606.1 482.672 2
 6 0 7 840.401 180.413 2
 6 -1 -23 502.893 245.529 2
 6 1 -23 479.638 281.941 2
 6 1 -22 1176.53 390.797 2
 6 -1 -22 1520.37 432.75 2
 6 -1 -21 863.615 340.706 2
 6 1 -21 346.528 214.356 2
 6 1 -20 1344.59 421.735 2
 6 -1 -20 1315.73 382.035 2
 6 -1 -19 856.282 317.449 2
 6 1 -19 832.676 305.385 2
 6 -1 -18 265.518 190.997 2
 6 1 -18 109.528 118.317 2
 6 1 -17 854.584 272.634 2
 6 -1 -17 934.188 288.677 2
 6 -1 -16 745.405 282.748 2
 6 1 -16 302.743 229.824 2
 6 -1 -15 942.371 278.125 2
 6 1 -15 968.459 290.836 2
 6 1 -14 2681.17 465.432 2
 6 -1 -14 2633.37 459.687 2
 6 -1 -13 363.993 178.35 2
 6 1 -13 509.712 205.546 2
 6 1 -12 2023.08 389.337 2
 6 -1 -12 2954.19 461.391 2
 6 -1 -11 66.3526 116.902 2
 6 1 -11 112.17 89.6118 2
 6 1 -10 5688.49 628.443 2
 6 -1 -10 6297.78 623.72 2
 6 -1 -9 272.872 133.88 2
 6 1 -9 380.923 166.075 2
 6 -1 -8 6447.18 555.405 2
 6 1 -8 6587.72 605.377 2
 6 -1 -7 3174.23 367.968 2
 6 1 -7 2824.75 380.721 2
 6 1 -6 8284.16 632.144 2
 6 -1 -6 7907.94 560.614 2
 6 -1 -5 7336.1 506.133 2
 6 1 -5 5683.85 503.187 2
 6 -1 -4 4740.6 391.306 2
 -6 -1 -4 4401.4 421.682 1
 6 1 -4 4808.42 452.256 2
 6 -1 -3 1149.11 183.544 2
 6 1 -3 860.998 188.738 2
 -6 -1 -3 822.13 182.535 1
 -6 1 -2 14295.8 658.826 1
 6 -1 -2 14580.4 586.951 2
 6 1 -2 15962.7 763.728 2
 -6 -1 -2 15284.2 777.631 1
 -6 1 -1 6926.37 444.905 1
 6 -1 -1 7857.82 386.616 2
 6 1 -1 7830.44 506.316 2
 -6 -1 -1 7345.25 539.206 1
 6 -1 0 20247.8 564.383 2
 6 -1 0 17387.9 780.902 1
 -6 -1 0 19398.5 871.349 1
 6 1 0 20023.5 801.156 2
 -6 1 0 20016.8 754.519 1
 6 1 1 7408.44 478.088 2
 6 -1 1 7442.91 316.252 2
 6 -1 1 7396.17 507.231 1
 -6 -1 1 7275.42 538.358 1
 -6 1 1 7575.26 466.445 1
 -6 1 1 7000.01 368.012 2
 -6 -1 2 12671.9 677.271 2
 -6 -1 2 15115.3 782.063 1
 -6 1 2 14954.8 659.879 1
 -6 1 2 13189.7 570.549 2
 6 -1 2 13995.4 417.52 2
 -6 1 3 694.726 154.969 2
 -6 -1 3 906.204 203.355 1
 -6 1 3 739.726 166.791 1
 6 -1 4 4095.37 255.849 2
 -6 1 4 4255.92 398.428 2
 6 -1 5 6228.25 353.331 2
 6 -1 6 7067.1 417.659 2
 6 -1 7 2688.39 285.343 2
 6 -1 8 6797.98 508.019 2
 6 -2 -23 169.145 211.232 2
 6 2 -23 177.984 216.691 2
 6 -2 -22 50.1451 114.871 2
 6 2 -22 491.592 216.664 2
 6 -2 -21 313.679 225.648 2
 6 2 -21 385.016 196.803 2
 6 -2 -20 87.076 143.76 2
 6 2 -20 33.8521 101.35 2
 6 -2 -19 -43.7315 86.0398 2
 6 2 -19 -32.9119 122.967 2
 6 -2 -18 278.584 227.008 2
 6 2 -18 308.913 160.373 2
 6 2 -17 202.355 167.988 2
 6 -2 -17 226.637 119.246 2
 6 -2 -16 1142.02 322.67 2
 6 2 -16 967.509 296.292 2
 6 2 -15 2366.5 475.57 2
 6 -2 -15 2729.76 477.782 2
 6 -2 -14 688.85 253.974 2
 6 2 -14 837.298 276.075 2
 6 2 -13 106.58 171.913 2
 6 -2 -13 52.8559 76.6836 2
 6 2 -12 2570.84 451.623 2
 6 -2 -12 2229.23 401.722 2
 6 -2 -11 1862.27 340.64 2
 6 2 -11 2067.97 392.044 2
 6 2 -10 2279.97 398.393 2
 6 -2 -10 2251.71 361.862 2
 6 2 -9 3936.05 502.002 2
 6 -2 -9 4364.06 469.205 2
 6 -2 -8 1386.43 258.648 2
 6 2 -8 1532.76 293.588 2
 6 2 -7 3090.76 429.008 2
 6 -2 -7 2320.87 326.64 2
 6 -2 -6 1113.7 214.484 2
 6 2 -6 994.182 265.472 2
 6 -2 -5 696.792 154.305 2
 6 2 -5 786.205 213.868 2
 -6 -2 -4 8388.34 602.68 1
 6 2 -4 9304.85 681.073 2
 6 -2 -4 9373.04 515.288 2
 -6 -2 -3 14862 802.925 1
 6 2 -3 16867.9 879.64 2
 6 -2 -3 15347.6 600.426 2
 6 2 -2 14488.1 786.235 2
 -6 -2 -2 14341.2 789.669 1
 6 -2 -2 13901.7 506.382 2
 6 -2 -1 34609.6 678.746 2
 6 2 -1 36698.8 1230.62 2
 -6 -2 -1 37278.2 1267.49 1
 -6 2 0 3103.01 271.791 1
 6 -2 0 3052.93 301.998 1
 -6 -2 0 4048.19 440.535 1
 6 2 0 3455.63 373.582 2
 6 -2 0 2430.06 144.195 2
 6 2 1 35415.8 1144.94 2
 -6 2 1 35533.5 911.078 1
 -6 2 1 33695.2 725.1 2
 -6 -2 1 35849 1255.75 1
 6 -2 1 33423.3 1001.15 1
 -6 2 2 13583.1 540.755 2
 -6 -2 2 13633.1 795.766 1
 -6 2 2 14050.2 573.065 1
 6 -2 2 14309.9 685.995 1
 6 -2 3 14347.1 730.01 1
 -6 2 3 15302 655.574 2
 -6 -2 3 16441.8 883.965 1
 -6 2 3 16039.4 627.036 1
 -6 2 4 8793.49 544.807 2
 -6 2 4 8346.23 474.795 1
 6 -2 5 534.125 87.116 2
 -6 2 5 437.566 137.829 2
 6 -2 6 795.835 126.546 2
 6 -2 7 2490.53 253.566 2
 6 -2 8 1194.12 202.966 2
 6 -2 9 4546.17 421.936 2
 6 3 -23 1707.82 474.615 2
 6 3 -22 41.8019 159.517 2
 6 3 -21 1230.69 393.615 2
 6 3 -20 947.914 322.51 2
 6 -3 -20 744.574 328.864 2
 6 3 -19 3045.93 600.883 2
 6 -3 -19 2592.49 533.683 2
 6 -3 -18 1166.51 347.051 2
 6 3 -18 677.9 269.509 2
 6 3 -17 3098.36 571.139 2
 6 -3 -17 2799.24 527.917 2
 6 -3 -16 768.346 260.035 2
 6 3 -16 736.585 268.584 2
 6 3 -15 4023.34 627.445 2
 6 -3 -15 4138.23 584.213 2
 6 3 -14 5108.1 682.912 2
 -6 3 -14 4562.67 487.834 2
 6 -3 -14 4641.19 605.372 2
 6 3 -13 3660.74 583.528 2
 -6 3 -13 3879.42 444.269 2
 6 -3 -13 3599.26 510.699 2
 6 3 -12 2374.34 456.637 2
 -6 3 -12 3381.78 374.776 2
 6 -3 -12 3675.57 507.175 2
 6 -3 -11 3286.04 457.888 2
 6 3 -11 3103.76 489.529 2
 -6 3 -11 3743.37 377.343 2
 6 3 -10 995.287 283.69 2
 6 -3 -10 1240.25 272.19 2
 6 -3 -9 4348.89 471.77 2
 6 3 -9 3833.5 520.161 2
 6 3 -8 207.996 124.406 2
 6 -3 -8 442.291 158.239 2
 6 -3 -7 929.22 203.944 2
 6 3 -7 1082.68 251.077 2
 6 3 -6 5414.65 566.87 2
 6 -3 -6 6074.85 474.871 2
 -6 -3 -5 15167.6 866.464 1
 6 3 -5 16036.4 964.198 2
 6 -3 -5 16168.7 732.228 2
 -6 -3 -4 2536.57 350.66 1
 6 3 -4 2441.57 383.076 2
 6 3 -3 13937 855.997 2
 -6 -3 -3 14756 853.55 1
 6 3 -2 12121.1 792.96 2
 -6 -3 -2 14091.1 827.76 1
 -6 -3 -1 18890.7 949.654 1
 6 3 -1 20341.1 1016.59 2
 6 -3 0 583.273 121.957 1
 6 3 0 559.841 180.584 2
 -6 -3 0 795.269 231.448 1
 -6 3 1 15944.6 484.165 2
 -6 3 1 18236 560.658 1
 -6 -3 1 18616.4 962.282 1
 6 -3 1 16330 643.983 1
 -6 3 2 11742 496.996 2
 -6 -3 2 12303.9 810.264 1
 -6 3 2 12606.6 467.309 1
 6 -3 2 12015.8 592.343 1
 -6 -3 3 12749.3 832.517 1
 -6 3 3 14238.9 508.95 1
 6 -3 3 13034.6 659.988 1
 -6 3 3 12987.3 597.146 2
 -6 3 4 2037.94 267.484 2
 -6 3 4 2436.15 223.589 1
 6 -3 6 5524.96 296.815 2
 6 -3 7 1256.9 171.271 2
 6 -3 8 373.741 109.033 2
 6 -3 9 3781.75 364.231 2
 6 4 -22 421.02 234.058 2
 6 4 -21 779.296 344.15 2
 6 4 -20 2462.03 553.493 2
 6 4 -19 2236.24 524.444 2
 -6 4 -19 2860.72 469.207 2
 6 4 -18 1107.59 366.097 2
 -6 4 -18 861.172 253.007 2
 6 4 -17 4295.6 702.906 2
 -6 4 -17 4586.28 546.479 2
 6 4 -16 2536.03 533.87 2
 -6 4 -16 2778.46 412.29 2
 6 4 -15 5261.13 744.965 2
 -6 4 -15 5150.12 536.93 2
 6 4 -14 10804.3 1024.99 2
 -6 4 -14 11312.1 756.397 2
 6 4 -13 6668.88 773.253 2
 -6 4 -13 6771.4 561.878 2
 6 4 -12 8375.22 845.703 2
 -6 4 -12 8196.32 580.843 2
 6 4 -11 9171.04 867.882 2
 -6 4 -11 10056.5 608.098 2
 6 4 -10 7636.86 773.154 2
 -6 4 -10 7198.79 486.143 2
 -6 4 -9 16457.7 673.597 2
 6 4 -9 15394.5 1084.84 2
 -6 4 -8 682.021 125.436 2
 6 4 -8 383.225 168.25 2
 6 4 -7 20056 1180.95 2
 -6 4 -7 19123.5 591.55 2
 -6 4 -6 857.305 110.271 2
 6 4 -6 1383.71 329.184 2
 6 4 -5 1805.03 347.679 2
 -6 -4 -5 1864.33 316.852 1
 -6 4 -5 916.532 86.6487 2
 6 4 -4 1870.71 354.485 2
 -6 -4 -4 1687.39 320.538 1
 6 4 -3 2960.13 427.75 2
 -6 -4 -3 2395.48 365.157 1
 6 4 -2 464.808 184.202 2
 -6 -4 -2 1582.48 305.983 1
 -6 -4 -1 12890.7 836.447 1
 6 4 -1 13458.1 887.686 2
 -6 4 0 79.0314 31.8782 2
 6 4 0 404.781 222.817 2
 -6 -4 0 668.858 244.237 1
 -6 4 1 11840.2 455.673 2
 -6 -4 1 13434.7 859.807 1
 6 -4 1 12252.9 491.372 1
 -6 4 2 306.739 89.5161 2
 -6 -4 2 164.964 137.126 1
 6 -4 2 343.929 97.5733 1
 -6 4 3 2282.53 257.244 2
 -6 4 3 1879.86 135.652 1
 -6 -4 3 2939.07 421.056 1
 6 -4 3 2569.78 279.111 1
 -6 4 4 1347.68 221.273 2
 6 -4 4 1546.15 235.051 1
 -6 -4 4 1664.5 333.368 1
 -6 4 4 1393.4 131.899 1
 -6 4 5 1573.8 160.398 1
 6 -4 7 19247.7 650.264 2
 6 -4 8 615.311 131.047 2
 6 -4 9 14882.2 723.142 2
 6 5 -21 1258.14 427.276 2
 6 5 -20 934.245 348.156 2
 6 5 -19 486.858 243.752 2
 -6 5 -18 1162.89 291.651 2
 6 5 -18 2869.82 597.262 2
 -6 5 -17 1008.48 270.888 2
 6 5 -17 995.108 379.466 2
 -6 5 -16 3908.17 491.65 2
 6 5 -16 5087.08 755.899 2
 -6 5 -15 529.694 163.891 2
 6 5 -15 450.653 222.121 2
 6 5 -14 2620.52 522.405 2
 -6 5 -14 2445.61 357.294 2
 -6 5 -13 767.327 197.675 2
 6 5 -13 1360.04 370.653 2
 6 5 -12 2747.45 504.3 2
 -6 5 -12 3047.75 358.668 2
 -6 5 -11 1262.13 220.155 2
 6 5 -11 1167.85 319.288 2
 6 5 -10 6414.34 743.364 2
 -6 5 -10 6445.97 472.267 2
 6 5 -9 12818.1 1036.58 2
 -6 5 -9 11864.2 596.914 2
 6 5 -8 8024.28 799.687 2
 -6 5 -8 7767.24 453.261 2
 6 5 -7 9669.56 866.797 2
 -6 5 -7 8386.54 437.48 2
 -6 5 -6 3673.94 255.644 2
 -6 -5 -6 4231.25 510.042 1
 6 5 -6 4846.29 618.284 2
 -6 5 -5 11788.2 417.57 2
 -6 -5 -5 15291.7 939.427 1
 6 5 -5 14747.4 1045.15 2
 -6 5 -4 131.939 44.1669 2
 -6 -5 -4 265.284 167.412 1
 6 5 -4 283.091 107.495 2
 -6 5 -3 5042.71 242.183 2
 6 5 -3 7476.06 721.896 2
 -6 -5 -3 7356.84 662.364 1
 6 5 -2 725.769 224.432 2
 -6 -5 -2 1296.2 277.472 1
 -6 5 -2 770.089 102.387 2
 -6 5 -2 708.734 90.6486 2
 -6 -5 -1 8618.75 718.534 1
 -6 5 -1 8115.15 351.49 2
 -6 5 -1 6816.92 316.934 2
 6 5 -1 8235.14 742.818 2
 6 5 0 10210.9 835.462 2
 -6 -5 0 10843.4 839.687 1
 -6 5 0 8430.83 392.805 2
 6 -5 1 7200.32 309.717 1
 -6 5 1 7997.22 429.668 2
 -6 5 2 873.011 154.859 2
 -6 -5 2 772.128 240.772 1
 6 -5 2 1031.83 144.793 1
 -6 -5 3 7576.26 719.31 1
 6 -5 3 6160.81 399.814 1
 -6 5 3 6148.14 457.448 2
 -6 -5 4 605.181 223.699 1
 -6 5 6 3270.35 183.353 1
 6 6 -21 182.066 240.302 2
 6 6 -20 330.87 202.438 2
 6 6 -19 488.69 310.665 2
 6 6 -18 1551.61 484.629 2
 6 6 -17 4925.83 789.489 2
 6 6 -16 227.284 163.538 2
 6 6 -15 6048.44 830.898 2
 -6 6 -14 1375.5 278.386 2
 6 6 -14 1550.17 429.67 2
 6 6 -13 2366.67 516.918 2
 -6 6 -13 1885.2 310.409 2
 -6 6 -12 3801.09 414.727 2
 6 6 -12 4629.29 694.642 2
 -6 6 -11 616.626 168.599 2
 6 6 -11 364.018 185.227 2
 6 6 -10 2854.83 510.308 2
 -6 6 -10 2339.23 303.749 2
 -6 6 -9 12588.6 646.277 2
 6 6 -9 13516.8 1108.02 2
 -6 6 -8 1538.22 217.524 2
 6 6 -8 1663.6 396.448 2
 -6 6 -7 4186.58 337.782 2
 6 6 -7 5157.32 677.9 2
 -6 6 -6 1090.56 167.933 2
 -6 -6 -6 1369.91 309.164 1
 6 6 -5 2302.26 439.156 2
 -6 -6 -5 1884.69 359.208 1
 -6 6 -5 2000.97 222.15 2
 -6 6 -4 3268.13 266.848 2
 6 6 -4 4612.38 622.464 2
 -6 -6 -4 4150.61 526.723 1
 -6 -6 -3 3403 474.281 1
 -6 6 -3 2727.8 241.908 2
 6 6 -3 3268.82 520.829 2
 -6 6 -2 3515.69 282.326 2
 -6 -6 -2 4682.06 563.249 1
 6 6 -2 4507.38 602.524 2
 -6 -6 -1 1906.04 359.57 1
 6 6 -1 2430.42 438.867 2
 -6 6 -1 1936.52 211.999 2
 -6 -6 0 1248.58 334.427 1
 6 6 0 1503.35 400.452 2
 -6 6 0 850.683 151.862 2
 -6 6 1 1696.44 225.837 2
 -6 -6 1 2387.26 422.836 1
 -6 -6 2 4029.39 531.755 1
 6 -6 2 3071.33 218.226 1
 -6 6 2 3226.85 332.497 2
 6 -6 3 2503.58 238.706 1
 -6 -6 3 3062.85 485.825 1
 -6 -6 4 4705.84 617.76 1
 -6 -6 5 2561.03 471.965 1
 6 7 -19 745.484 338.196 2
 6 7 -18 98.1123 142.971 2
 6 7 -17 123.672 179.016 2
 6 7 -16 110.717 140.932 2
 6 7 -15 1678.96 439.208 2
 6 7 -14 934.195 364.768 2
 6 7 -13 446.475 257.053 2
 6 7 -12 499.179 281.969 2
 6 7 -11 1480.98 397.947 2
 6 7 -10 215.176 188.112 2
 -6 7 -9 547.736 153.718 2
 6 7 -9 381.122 222.261 2
 -6 7 -8 1984.79 270.35 2
 6 7 -8 2805.96 555.757 2
 -6 7 -7 5882.16 449.102 2
 6 7 -7 7205.18 853.038 2
 6 7 -6 2420.87 482.259 2
 -6 -7 -6 1723.85 352.726 1
 -6 7 -6 1281.4 211.259 2
 6 7 -5 219.76 197.45 2
 -6 -7 -5 188.925 118.127 1
 -6 7 -5 262.737 103.394 2
 6 7 -4 2875.65 519.616 2
 -6 -7 -4 2961.02 468.729 1
 -6 7 -4 2075.96 250.147 2
 -6 7 -3 3880.86 344.9 2
 6 7 -3 4536.09 647.801 2
 -6 -7 -3 4671.33 588.316 1
 -6 7 -2 519.607 136.987 2
 6 7 -2 910.063 304.299 2
 -6 -7 -1 1120.45 294.543 1
 6 7 -1 1488.66 383.362 2
 -6 7 -1 1264.75 207.185 2
 -6 -7 0 1004.68 269.56 1
 6 7 0 1187.46 358.082 2
 -6 7 0 555.105 140.882 2
 6 7 1 1622.17 364.567 2
 -6 -7 1 1378.71 330.109 1
 -6 -7 2 864.834 292.065 1
 -6 -7 3 4294.81 595.344 1
 -6 -7 4 3384.92 536.406 1
 -6 -7 5 162.406 128.064 1
 -6 -7 6 1480.11 380.678 1
 6 8 -18 70.8567 213.256 2
 6 8 -17 662.231 302.279 2
 6 8 -16 216.886 227.894 2
 6 8 -15 1624.27 467.79 2
 6 8 -14 203.999 135.47 2
 6 8 -13 1529.4 463.504 2
 6 8 -12 724.133 315.582 2
 6 8 -11 8.21916 107.063 2
 6 8 -10 82.7409 140.103 2
 6 8 -9 2931.61 593.46 2
 6 8 -8 608.202 227.893 2
 6 8 -7 2389.44 526.931 2
 -6 8 -6 53.0389 63.9607 2
 -6 -8 -6 290.902 187.547 1
 6 8 -6 134.167 270.721 2
 6 8 -5 1124.51 355.98 2
 -6 -8 -5 612.641 250.527 1
 -6 8 -5 671.16 164.316 2
 -6 -8 -4 2783.06 467.693 1
 6 8 -4 3341.33 596.723 2
 -6 8 -4 1954.71 274.273 2
 6 8 -3 1692.81 417.293 2
 -6 8 -3 1050.1 201.887 2
 -6 -8 -3 1073.71 306.144 1
 -6 8 -2 1115.12 209.847 2
 6 8 -2 1468.34 385.834 2
 -6 -8 -1 6993.06 753.855 1
 -6 8 -1 6420.35 521.747 2
 6 8 -1 7263.66 851.928 2
 -6 -8 0 326.964 180.449 1
 6 8 0 269.762 190.703 2
 -6 8 0 227.868 108.321 2
 6 8 1 6422.56 801.604 2
 -6 -8 1 6250.43 727.228 1
 -6 -8 2 1446.7 341.356 1
 -6 -8 3 1004.65 295.07 1
 -6 -8 4 3119.62 545.488 1
 -6 -8 5 666.949 275.648 1
 -6 -8 6 77.3146 121.478 1
 -6 -8 7 3212.24 582.422 1
 6 9 -16 246.942 194.427 2
 6 9 -15 252.135 264.643 2
 6 9 -14 697.862 346.832 2
 6 9 -13 179.297 189.229 2
 6 9 -12 821.358 345.799 2
 6 9 -11 454.376 268.887 2
 6 9 -10 1618.57 460.93 2
 6 9 -9 143.246 206.561 2
 6 9 -8 1791.78 473.267 2
 6 9 -7 3247.74 641.975 2
 6 9 -6 2058.75 512.064 2
 -6 -9 -6 1262.42 326.422 1
 6 9 -5 1809.17 466.067 2
 -6 -9 -5 1901.52 411.656 1
 6 9 -4 978.873 331.386 2
 -6 -9 -4 250.71 158.334 1
 -6 -9 -3 3771.34 559.708 1
 6 9 -3 4266.19 708.856 2
 -6 -9 -2 5189.72 679.826 1
 6 9 -2 4967.75 743.625 2
 -6 -9 -1 3617.07 555.283 1
 6 9 -1 4999.86 764.915 2
 -6 -9 0 2087.44 454.736 1
 -6 9 0 1451.35 274.445 2
 6 9 0 1901.61 540.558 2
 6 9 1 5024.24 784.947 2
 -6 9 1 3158.11 401.739 2
 -6 -9 1 4184.17 620.081 1
 6 9 2 4929.48 734.579 2
 -6 -9 2 5170.78 707.961 1
 -6 -9 3 3552.09 594.614 1
 -6 -9 4 889.889 325.626 1
 -6 -9 5 2526.86 507.268 1
 -6 -9 6 1499.25 420.945 1
 -6 -9 7 3522.3 651.479 1
 -6 -9 8 1216.35 359.531 1
 -6 -9 9 164.317 155.627 1
 6 10 -14 1292.59 433.995 2
 6 10 -13 310.669 146.584 2
 6 10 -12 1320.65 444.12 2
 6 10 -11 1547.69 513.529 2
 6 10 -10 1341.72 443.534 2
 6 10 -9 2561.39 605.891 2
 6 10 -8 576.745 281.457 2
 6 10 -7 465.18 302.298 2
 6 10 -6 3232.8 698.494 2
 6 10 -5 59.0377 141.546 2
 -6 -10 -5 176.406 115.692 1
 -6 -10 -4 1692.98 396.189 1
 6 10 -4 2104.13 517.793 2
 6 10 -3 1730.66 485.287 2
 -6 -10 -3 1753.08 393.771 1
 -6 -10 -2 2192.73 468.791 1
 6 10 -2 2192.89 531.522 2
 6 10 -1 2334.41 577.079 2
 -6 -10 -1 1900.72 431.439 1
 6 10 0 320.043 221.427 2
 -6 -10 0 186.71 159.023 1
 -6 -10 1 2783.8 520.942 1
 6 10 1 1901.46 497.182 2
 -6 -10 2 2051.36 474.783 1
 6 10 2 2552.32 587.57 2
 6 10 3 2712.31 603.241 2
 -6 -10 3 2523.68 517.82 1
 -6 -10 4 1537.76 418.533 1
 -6 -10 5 -6.76765 120.892 1
 -6 -10 6 4165.48 714.752 1
 -6 -10 7 396.527 241.371 1
 -6 -10 8 578.836 268.497 1
 -6 -10 9 2511.34 599.043 1
 -6 -10 10 1948.47 538.315 1
 -6 -10 11 1547.23 481.744 1
 6 11 -11 305.211 278.843 2
 6 11 -10 842.41 346.064 2
 6 11 -9 1354.56 459.586 2
 6 11 -8 549.078 286.766 2
 6 11 -7 639.943 299.021 2
 6 11 -6 424.501 230.39 2
 6 11 -5 82.4748 172.925 2
 -6 -11 -5 543.862 221.956 1
 6 11 -4 725.716 326.157 2
 -6 -11 -4 676.198 327.646 1
 6 11 -3 213.94 217.64 2
 -6 -11 -3 291.721 181.21 1
 6 11 -2 294.751 261.523 2
 -6 -11 -2 437.075 222.989 1
 6 11 -1 327.639 255.969 2
 -6 -11 -1 -41.2224 157.785 1
 -6 -11 0 1901.34 445.553 1
 6 11 0 3051.24 687.199 2
 6 11 1 383.243 268.736 2
 -6 -11 1 338.762 222.027 1
 -6 -11 2 445.351 228.543 1
 6 11 2 329.932 248.574 2
 -6 -11 3 -75.367 102.921 1
 6 11 3 164.845 178.6 2
 6 11 4 612.036 325.996 2
 -6 -11 4 665.669 293.097 1
 -6 -11 5 174.395 113.773 1
 -6 -11 6 146.462 192.862 1
 -6 -11 7 1418.09 426.097 1
 -6 -11 8 742.398 272.452 1
 -6 -11 9 1256.7 427.192 1
 -6 -11 10 1074.71 393.816 1
 -6 -11 11 64.283 134.394 1
 6 12 -6 175.151 183.833 2
 6 12 -5 -84.7357 144.742 2
 6 12 -4 -118.308 216.811 2
 6 12 -3 326.484 261.273 2
 6 12 -2 396.089 275.814 2
 -6 -12 -2 68.8162 135.589 1
 -6 -12 -1 123.995 136.787 1
 6 12 -1 -28.0278 161.086 2
 6 12 0 302.942 229.176 2
 -6 -12 0 -283.92 192.522 1
 6 12 1 311.177 256.12 2
 -6 -12 1 178.749 141.41 1
 6 12 2 377.54 263.429 2
 -6 -12 2 303.918 188.617 1
 -6 -12 3 776.432 304.461 1
 6 12 3 242.454 264.873 2
 -6 -12 4 198.211 158.978 1
 6 12 4 315.631 209.882 2
 6 12 5 193.897 169.236 2
 -6 -12 5 -16.2944 115.793 1
 -6 -12 6 1026 387.589 1
 7 0 -23 280.988 151.837 2
 7 0 -22 -78.1957 127.82 2
 7 0 -21 205.139 159.383 2
 7 0 -20 -376.395 215.714 2
 7 0 -19 144.321 157.546 2
 7 0 -18 228.602 171.362 2
 7 0 -17 16.1833 85.2925 2
 7 0 -16 74.5604 129.846 2
 7 0 -15 140.162 191.128 2
 7 0 -14 278.334 181.2 2
 7 0 -13 246.978 171.215 2
 7 0 -12 117.471 162.966 2
 7 0 -11 7.16 102.729 2
 7 0 -10 5.8803 87.3144 2
 7 0 -9 45.2763 58.0317 2
 7 0 -8 113.15 103.891 2
 7 0 -7 131.121 119.35 2
 7 0 -6 -21.3903 73.3851 2
 7 0 -5 18.0384 45.9953 2
 7 0 -4 71.9823 70.104 2
 -7 0 -3 126.634 111.676 1
 7 0 -3 60.1988 71.7076 2
 -7 0 -2 -9.7747 77.4626 1
 7 0 -2 -25.3709 60.0946 2
 7 0 -1 83.9731 63.6636 2
 -7 0 -1 -9.85635 75.0344 1
 7 0 0 7.24423 42.4656 2
 -7 0 0 30.1156 73.6666 1
 -7 0 1 -17.3168 59.5705 1
 7 0 1 63.7746 62.5918 2
 7 0 2 -17.3152 45.0448 2
 -7 0 2 6.66168 63.3105 2
 -7 0 2 93.3132 88.4339 1
 -7 0 3 999.678 290.606 1
 -7 0 4 -26.5139 73.2287 1
 7 1 -23 246.71 155.384 2
 7 -1 -23 700.548 348.699 2
 7 -1 -22 303.236 256.196 2
 7 1 -22 639.008 328.402 2
 7 -1 -21 508.414 252.649 2
 7 1 -21 932.912 354.357 2
 7 -1 -20 333.399 176.231 2
 7 1 -20 488.572 270.24 2
 7 -1 -19 2545.62 525.647 2
 7 1 -19 3158.45 598.524 2
 7 -1 -18 1746.54 438.32 2
 7 1 -18 1754.76 439.43 2
 7 -1 -17 615.837 266.228 2
 7 1 -17 649.273 268.962 2
 7 -1 -16 382.476 187.547 2
 7 1 -16 424.257 233.34 2
 7 -1 -15 317.146 213.591 2
 7 1 -15 637.996 276.798 2
 7 1 -14 3143.51 532.592 2
 7 -1 -14 3394.55 529.618 2
 7 1 -13 3682.46 544.033 2
 7 -1 -13 3615.88 527.264 2
 7 1 -12 17651.6 1160.62 2
 7 -1 -12 18727.7 1160.16 2
 7 1 -11 4144.15 547.514 2
 7 -1 -11 3870.62 510.706 2
 7 -1 -10 1800.26 358.204 2
 7 1 -10 1706.48 348.243 2
 7 -1 -9 903.61 235.114 2
 7 1 -9 1042.45 251.2 2
 7 -1 -8 1424.75 268.16 2
 7 1 -8 1101.04 254.895 2
 7 -1 -7 3744.22 421.713 2
 7 1 -7 3836 467.221 2
 7 -1 -6 3487.61 387.778 2
 7 1 -6 3512.62 422.297 2
 7 -1 -5 9300.05 597.567 2
 7 1 -5 10245.9 707.032 2
 -7 -1 -4 6099.58 524.49 1
 7 -1 -4 5771.9 450.184 2
 7 1 -4 6233.03 534.046 2
 -7 -1 -3 12701.5 749.967 1
 7 -1 -3 12444.6 629.294 2
 7 1 -3 13245.1 746.129 2
 -7 1 -2 8648.25 551.74 1
 7 -1 -2 10104.2 519.911 2
 7 1 -2 10240.4 644.177 2
 -7 -1 -2 10204.5 671.327 1
 -7 1 -1 31143.3 1025.17 1
 7 -1 -1 31954 847.175 2
 7 1 -1 32868.6 1125.69 2
 -7 -1 -1 31072.2 1163.25 1
 7 -1 0 15753.2 551.641 2
 7 1 0 15559.6 748.109 2
 -7 -1 0 16757.1 858.495 1
 -7 1 0 15978.8 738.748 1
 -7 1 1 28120.9 781.113 2
 7 -1 1 31227.5 724.736 2
 -7 -1 1 33107.3 1234.15 1
 -7 1 1 32320.2 1054.47 1
 7 1 1 33049.3 1083.03 2
 7 1 2 10265.3 589.876 2
 7 -1 2 10089.2 404.413 2
 -7 -1 2 9758.93 664.135 1
 -7 1 2 9917.85 595.248 1
 -7 1 2 9389.86 516.515 2
 -7 -1 3 12934.6 798.026 1
 -7 1 3 13347.6 697.411 1
 -7 1 3 12178.2 643.057 2
 7 -1 3 12888.3 455.345 2
 -7 -1 4 5873.98 546.234 1
 -7 1 4 6018.36 481.762 1
 -7 1 4 5635.12 476.988 2
 7 -1 5 9360.14 448.183 2
 7 -1 6 2959.4 275.651 2
 7 -1 7 2862.44 296.338 2
 7 -1 8 1346.9 221.8 2
 7 -2 -23 1963.23 506.097 2
 7 2 -23 2665.47 598.148 2
 7 -2 -22 1057.14 383.557 2
 7 2 -22 422.853 240.998 2
 7 -2 -21 879.483 338.395 2
 7 2 -21 1181.72 389.554 2
 7 2 -20 1672.93 468.235 2
 7 -2 -20 1299.66 399.599 2
 7 -2 -19 2004.67 490.535 2
 7 2 -19 1516.3 416.513 2
 7 2 -18 7329.06 892.966 2
 7 -2 -18 7108.73 856.965 2
 7 2 -17 6697.29 832.817 2
 7 -2 -17 6564.67 790.424 2
 7 2 -16 2983.37 546.132 2
 7 -2 -16 2161.6 452.957 2
 7 2 -15 3343.35 558.067 2
 7 -2 -15 3575.05 560.073 2
 7 -2 -14 709.826 269.331 2
 7 2 -14 734.357 253.429 2
 7 -2 -13 1345.82 312.112 2
 7 2 -13 967.91 295.148 2
 7 2 -12 5337.78 670.963 2
 7 -2 -12 4896.35 578.981 2
 7 2 -11 11590.8 950.597 2
 7 -2 -11 11236.4 847.079 2
 7 2 -10 2556.37 440.948 2
 7 -2 -10 3396.07 452.522 2
 7 -2 -9 1386.36 283.871 2
 7 2 -9 1112.65 284.991 2
 7 2 -8 3279.84 465.527 2
 7 -2 -8 2979.08 389.766 2
 7 2 -7 9244.62 757.255 2
 7 -2 -7 10041.7 669.644 2
 7 -2 -6 2169.19 299.241 2
 7 2 -6 2104.24 348.052 2
 -7 -2 -5 12769 809.27 1
 7 2 -5 12237.6 817.159 2
 7 -2 -5 11902.4 651.366 2
 -7 -2 -4 7481.83 602.712 1
 7 2 -4 7948.15 646.807 2
 7 -2 -4 8212.92 503.973 2
 -7 -2 -3 4743.37 499.104 1
 7 2 -3 5521.21 532.892 2
 7 -2 -3 4699.57 352.277 2
 7 2 -2 5189.39 501.884 2
 -7 -2 -2 4726 489.059 1
 7 -2 -2 5134.4 329.167 2
 7 2 -1 9549.19 664.615 2
 -7 -2 -1 9608.91 688.065 1
 7 -2 -1 8389.93 366.484 2
 -7 -2 0 1811.15 301.016 1
 7 2 0 1239.2 241.837 2
 -7 2 0 1480.89 209.99 1
 7 -2 0 1327.61 213.315 1
 7 -2 0 1047.63 106.41 2
 7 2 1 8654.58 623.895 2
 -7 -2 1 8332.06 660.276 1
 -7 2 1 7793.81 362.951 2
 -7 2 1 8674.2 505.736 1
 -7 2 2 4564.57 329.647 2
 -7 -2 2 4795.96 501.763 1
 -7 2 2 5177.89 388.548 1
 -7 2 3 4607.78 374.612 2
 -7 -2 3 4616.51 499.319 1
 -7 2 3 5330.72 406.42 1
 -7 2 4 6661.16 492.929 2
 -7 2 4 7031.08 483.93 1
 7 -2 5 9850.19 342.451 2
 -7 2 5 12515.4 659.388 1
 7 -2 6 2096.24 193.652 2
 7 -2 7 8898.94 462.621 2
 7 -2 8 2816.79 295.272 2
 7 -2 9 1107.89 207.84 2
 7 3 -22 684.141 317.254 2
 7 3 -21 99.8303 156.816 2
 7 -3 -21 -496.93 254.168 2
 7 3 -20 990.344 354.968 2
 7 -3 -20 865.321 338.375 2
 7 -3 -19 153.814 110.381 2
 7 3 -19 489.785 248.993 2
 7 3 -18 3437.03 625.129 2
 7 -3 -18 3919.67 624.264 2
 7 3 -17 3309.82 602.139 2
 7 -3 -17 3459.65 589.236 2
 7 -3 -16 769.604 294.467 2
 7 3 -16 824.802 281.401 2
 7 3 -15 1281.92 368.864 2
 7 -3 -15 1443.59 353.269 2
 7 3 -14 3470.27 594.104 2
 7 -3 -14 3663.73 548.326 2
 7 3 -13 9065.92 910.188 2
 7 -3 -13 9920.61 856.211 2
 7 3 -12 6040.36 722.529 2
 7 -3 -12 5541.72 620.66 2
 7 3 -11 2428.43 449.417 2
 7 -3 -11 2999.29 435.993 2
 7 3 -10 8151.88 794.616 2
 7 -3 -10 7770.02 675.566 2
 7 -3 -9 815.304 217.635 2
 7 3 -9 912.251 252.786 2
 7 -3 -8 843.101 211.042 2
 7 3 -8 525.36 183.146 2
 7 3 -7 11806 892.945 2
 7 -3 -7 12427.3 739.062 2
 7 3 -6 3397.79 468.812 2
 7 -3 -6 3529.04 370.415 2
 -7 -3 -5 24105.5 1143.2 1
 7 3 -5 25044.9 1260.69 2
 7 -3 -5 24907.7 914.636 2
 -7 -3 -4 5910.21 565.108 1
 7 3 -4 5879.74 604.652 2
 7 -3 -4 5710.67 405.924 2
 -7 -3 -3 1154.95 245.36 1
 7 3 -3 2257.76 370.297 2
 7 3 -2 5339.2 553.596 2
 -7 -3 -2 6150 578.587 1
 7 3 -1 1272.52 304.401 2
 -7 -3 -1 728.866 205.838 1
 7 3 0 2235.69 349.104 2
 7 -3 0 2177.77 248.366 1
 -7 -3 0 2857.24 392.51 1
 -7 3 1 796.837 161.298 1
 7 3 1 478.815 155.872 2
 7 -3 1 444.965 116.634 1
 -7 3 1 697.26 107.32 2
 -7 -3 1 933.687 283.889 1
 -7 3 2 5645.5 343.772 2
 -7 -3 2 5857.14 587.054 1
 7 -3 2 5723.41 447.522 1
 -7 3 2 5943.41 367.389 1
 -7 3 3 2078.39 250.088 2
 -7 -3 3 1666.02 320.083 1
 -7 3 3 2144.8 231.077 1
 -7 3 4 5703.67 444.1 2
 -7 -3 4 6540.28 644.752 1
 -7 3 4 5689.64 381.452 1
 -7 3 5 24867.5 840.308 1
 7 -3 7 11079.8 449.072 2
 7 -3 8 573.523 118.114 2
 7 -3 9 940.045 171.255 2
 7 4 -22 -63.4153 149.128 2
 7 4 -21 731.941 341.684 2
 7 4 -20 570.212 295.661 2
 7 4 -19 -195.825 169.022 2
 7 4 -18 11.8441 144.957 2
 7 4 -17 64.2629 159.477 2
 7 4 -16 1268.73 410.749 2
 7 4 -15 775.578 281.306 2
 7 4 -14 2614.83 510.436 2
 7 4 -13 2543.89 490.033 2
 7 4 -12 477.733 228.569 2
 7 4 -11 2454.81 463.12 2
 7 4 -10 868.681 264.357 2
 7 4 -9 578.894 248.636 2
 7 4 -8 3357.71 520.105 2
 7 4 -7 3635.96 533.084 2
 -7 -4 -6 4455.3 532.419 1
 7 4 -6 5185.54 617.795 2
 -7 -4 -5 3427.07 448.662 1
 7 4 -5 3330.98 487.137 2
 7 4 -4 -95.4993 76.8156 2
 -7 -4 -4 105.165 113.303 1
 -7 -4 -3 1894.88 336.916 1
 7 4 -3 1764.86 362.517 2
 7 4 -2 1547.86 322.29 2
 -7 -4 -2 1542.83 327.088 1
 -7 -4 -1 399.466 184.417 1
 7 4 -1 424.104 207.993 2
 7 4 0 887.387 240.632 2
 -7 -4 0 610.574 183.411 1
 7 -4 1 376.503 101.785 1
 7 4 1 307.644 156.095 2
 -7 4 1 314.985 70.6804 2
 -7 -4 1 670.271 232.432 1
 -7 4 2 1254.58 168.08 2
 -7 -4 2 1574.24 310.698 1
 7 -4 2 1244.8 194.656 1
 -7 4 3 1664.02 156.587 1
 -7 4 3 1771.13 229.977 2
 -7 -4 3 2276.79 387.409 1
 7 -4 3 1592.53 235.091 1
 -7 -4 4 126.38 104.121 1
 -7 4 4 -4.05335 23.3203 1
 -7 4 4 52.9286 64.2354 2
 -7 -4 5 3375.95 493.605 1
 -7 4 5 3436.59 264.296 1
 -7 4 6 4018.74 305.4 1
 7 5 -21 598.607 309.557 2
 7 5 -20 270.193 197.658 2
 7 5 -19 0.62267 160.923 2
 7 5 -18 275.003 194.825 2
 7 5 -17 327.967 215.213 2
 7 5 -16 -13.4334 160.681 2
 7 5 -15 2547 541.197 2
 7 5 -14 1064.52 352.467 2
 7 5 -13 678.66 280.358 2
 7 5 -12 3352.87 583.879 2
 -7 5 -12 2517.63 306.518 2
 -7 5 -11 444.482 122.572 2
 7 5 -11 668.735 262.048 2
 -7 5 -10 855.617 156.522 2
 7 5 -10 456.032 227.016 2
 -7 5 -9 220.498 81.385 2
 7 5 -9 32.6793 132.406 2
 -7 5 -8 3.29078 20.0642 2
 7 5 -8 -8.33846 130.023 2
 7 5 -7 519.051 239.267 2
 -7 5 -7 262.26 57.755 2
 -7 -5 -6 561.988 194.054 1
 7 5 -6 737.785 254.302 2
 -7 -5 -5 1469.73 317.717 1
 7 5 -5 741.18 269.552 2
 7 5 -4 1022.32 293.564 2
 -7 -5 -4 1231.65 291.789 1
 7 5 -3 351.874 191.382 2
 -7 -5 -3 667.981 276.569 1
 7 5 -2 546.879 203.448 2
 -7 -5 -2 1288.2 313.901 1
 -7 -5 -1 275.849 166.498 1
 7 5 -1 644.711 232.212 2
 -7 5 0 8083.57 307.923 2
 -7 5 0 6785.9 303.961 2
 -7 -5 0 11839.9 886.759 1
 7 5 0 10292.3 878.665 2
 7 -5 1 355.661 79.6557 1
 -7 5 1 588.557 109.137 2
 7 5 1 378.463 179.45 2
 -7 -5 1 504.443 193.33 1
 -7 5 2 659.01 130.376 2
 -7 -5 2 919.072 247.828 1
 7 -5 2 886.549 148.81 1
 -7 5 3 860.575 174.627 2
 -7 -5 3 557.575 227.438 1
 7 -5 3 507.637 159.883 1
 7 -5 4 1037.14 198.326 1
 -7 -5 4 1248.45 324.139 1
 -7 -5 5 1183.99 303.331 1
 -7 5 6 297.686 62.127 1
 -7 -5 6 486.592 195.48 1
 -7 5 7 221.446 70.4084 1
 7 6 -20 483.976 290.56 2
 7 6 -19 102.18 118.369 2
 7 6 -18 681.583 328.961 2
 7 6 -17 99.886 85.4893 2
 7 6 -16 448.594 217.407 2
 7 6 -15 418.327 225.811 2
 7 6 -14 1070.72 362.189 2
 7 6 -13 1489.21 410.109 2
 7 6 -12 912.826 317.676 2
 7 6 -11 2059.65 499.86 2
 7 6 -10 1979.42 449.77 2
 7 6 -9 1019.42 309.263 2
 -7 6 -8 1893.71 200.076 2
 7 6 -8 1989.08 445.076 2
 7 6 -7 4694.31 673.483 2
 -7 6 -7 2650.26 212.149 2
 -7 -6 -6 4179.83 535.829 1
 7 6 -6 3781.28 590.941 2
 -7 -6 -5 7345.8 718.947 1
 7 6 -5 5948.54 729.657 2
 7 6 -4 2796.79 496.708 2
 -7 -6 -4 1931.01 370.185 1
 -7 6 -3 772.954 82.7704 2
 -7 6 -3 432.22 62.0381 2
 7 6 -2 6077.11 724.479 2
 -7 -6 -2 6596.87 701.505 1
 -7 6 -1 91.3154 41.4628 2
 -7 -6 -1 87.5192 101.72 1
 7 6 -1 298.043 198.8 2
 -7 6 -1 152.435 51.7346 2
 -7 -6 0 2003.29 393.71 1
 7 6 0 1639.06 380.058 2
 -7 6 0 813.335 132.207 2
 -7 6 0 1294.84 161.418 2
 7 6 1 310.749 195.098 2
 -7 -6 1 545.299 223.307 1
 -7 6 1 301.81 99.0745 2
 -7 -6 2 5554.82 656.946 1
 -7 6 2 3679.39 342.426 2
 -7 -6 3 1844.23 379.801 1
 -7 -6 4 2701.82 486.005 1
 -7 -6 5 6575.94 767.493 1
 -7 -6 6 3639.46 569.401 1
 7 7 -19 1889.66 547.263 2
 7 7 -18 516.923 287.576 2
 7 7 -17 2317.55 548.506 2
 7 7 -16 -44.5307 183.798 2
 7 7 -15 37.8136 167.119 2
 7 7 -14 40.6345 151.441 2
 7 7 -13 5288.85 792.544 2
 7 7 -12 883.244 333.004 2
 7 7 -11 2424.88 527.543 2
 7 7 -10 477.028 283.555 2
 7 7 -9 1941.84 452.352 2
 7 7 -8 2660.83 554.052 2
 7 7 -7 7574.54 886.034 2
 -7 -7 -6 4291.37 579.762 1
 7 7 -6 4877.06 717.475 2
 -7 -7 -5 6449.17 705.626 1
 7 7 -5 7420.66 870.761 2
 7 7 -4 15779 1246.96 2
 -7 -7 -4 15957.2 1114.66 1
 -7 -7 -3 2845.13 486.528 1
 7 7 -3 1855.75 428.013 2
 -7 7 -2 14764.8 584.994 2
 7 7 -2 18442.7 1351.07 2
 -7 -7 -2 17200.7 1170.78 1
 -7 7 -1 257.458 82.1254 2
 -7 -7 -1 666.487 235.815 1
 7 7 -1 524.886 279.435 2
 -7 7 0 -24.4951 44.1633 2
 7 7 0 -89.7742 105.338 2
 7 7 1 313.691 253.182 2
 -7 -7 1 462.363 201.195 1
 -7 -7 2 20757.9 1328.6 1
 -7 -7 3 2739.13 493.142 1
 -7 -7 4 15709.2 1205.18 1
 -7 -7 5 7950.71 876.432 1
 -7 -7 6 5633.64 749.306 1
 -7 -7 7 9133.49 957.121 1
 7 8 -17 1293.15 437.786 2
 7 8 -16 357.363 208.843 2
 7 8 -15 632.597 286.259 2
 7 8 -14 435.279 292.831 2
 7 8 -13 2362.05 547.846 2
 7 8 -12 217.599 184.937 2
 7 8 -11 1846.06 475.042 2
 7 8 -10 2593.82 571.438 2
 7 8 -9 1643.64 468.672 2
 7 8 -8 4967.73 781.508 2
 7 8 -7 5927.99 839.23 2
 7 8 -6 1443.08 400.946 2
 -7 -8 -6 1779.94 383.341 1
 -7 -8 -5 3953.69 572.818 1
 7 8 -5 4140.85 674.093 2
 -7 -8 -4 3585.84 563.288 1
 7 8 -4 4504.61 706.144 2
 -7 -8 -3 1994.9 411.052 1
 7 8 -3 1736.57 447.046 2
 7 8 -2 1123.32 361.414 2
 -7 -8 -2 1476.67 367.564 1
 7 8 -1 2720.43 552.439 2
 -7 -8 -1 3390.41 543.722 1
 -7 -8 0 4469.57 626.406 1
 7 8 0 3881.76 640.733 2
 7 8 1 2833.8 551.76 2
 -7 -8 1 3813.46 592.079 1
 7 8 2 1605.27 424.39 2
 -7 -8 2 1540.01 389.597 1
 -7 -8 3 2331.65 485.183 1
 -7 -8 4 4394.88 662.169 1
 -7 -8 5 4658.54 704.011 1
 -7 -8 6 1510 399.813 1
 -7 -8 7 6418.12 848.525 1
 -7 -8 8 6185.55 847.433 1
 -7 -8 9 2008.64 492.738 1
 7 9 -15 42.6662 101.387 2
 7 9 -14 361.846 293.059 2
 7 9 -13 448.915 248.562 2
 7 9 -12 112.895 178.158 2
 7 9 -11 1624.32 480.266 2
 7 9 -10 173.404 202.803 2
 7 9 -9 700.791 338.766 2
 7 9 -8 1024.28 348.155 2
 7 9 -7 2125.94 532.195 2
 7 9 -6 478.849 262.747 2
 -7 -9 -6 606.45 245.884 1
 7 9 -5 3470.29 665.761 2
 -7 -9 -5 2700.33 493.909 1
 7 9 -4 1120.28 409.337 2
 -7 -9 -4 948.441 285.143 1
 7 9 -3 419.901 333.499 2
 -7 -9 -3 383.174 198.712 1
 7 9 -2 3244.79 631.037 2
 -7 -9 -2 2703.23 501.31 1
 7 9 -1 1066 387.858 2
 -7 -9 -1 1211.03 357.108 1
 -7 -9 0 782.721 319.09 1
 7 9 0 883.099 336.398 2
 -7 -9 1 1215.6 370.005 1
 7 9 1 1436.55 417.658 2
 7 9 2 2836.66 615.353 2
 -7 -9 2 2510.24 530.455 1
 7 9 3 299.095 235.289 2
 -7 -9 3 881.127 335.56 1
 -7 -9 4 993.872 347.554 1
 -7 -9 5 3305.96 603.878 1
 -7 -9 6 1159.51 392.504 1
 -7 -9 7 2241.63 521.679 1
 -7 -9 8 831.906 351.25 1
 -7 -9 9 -106.448 209 1
 -7 -9 10 53.7833 123.359 1
 7 10 -13 116.852 118.709 2
 7 10 -12 -15.6518 151.088 2
 7 10 -11 151.13 253.451 2
 7 10 -10 584.619 304.455 2
 7 10 -9 91.5997 228.393 2
 7 10 -8 1658.03 494.064 2
 7 10 -7 210.923 215.118 2
 7 10 -6 121.11 188.199 2
 7 10 -5 -60.4018 216.563 2
 -7 -10 -5 136.245 185.726 1
 -7 -10 -4 267.83 93.1769 1
 7 10 -4 453.166 286.28 2
 7 10 -3 1610.13 466.329 2
 -7 -10 -3 1056.6 326.723 1
 -7 -10 -2 628.571 279.365 1
 7 10 -2 1370.95 493.333 2
 7 10 -1 1082.17 413.183 2
 -7 -10 -1 935.379 322.838 1
 7 10 0 229.249 233.76 2
 -7 -10 0 73.9006 98.224 1
 -7 -10 1 980.015 322.699 1
 7 10 1 685.914 319.751 2
 -7 -10 2 826.7 316.949 1
 7 10 2 1495.57 484.133 2
 7 10 3 2052.91 542.602 2
 -7 -10 3 1142.98 363.554 1
 -7 -10 4 305.975 209.758 1
 -7 -10 5 -156.565 170.504 1
 -7 -10 6 378.554 276.975 1
 -7 -10 7 547.707 260.74 1
 -7 -10 8 1000.2 393.292 1
 -7 -10 9 295.191 230.267 1
 -7 -10 10 -85.0679 177.354 1
 -7 -10 11 350.151 214.021 1
 -7 -10 12 -53.8447 209.311 1
 7 11 -10 1039.16 422.884 2
 7 11 -9 84.3909 110.846 2
 7 11 -8 9.70563 101.804 2
 7 11 -7 908.313 389.757 2
 7 11 -6 1005.45 399.281 2
 7 11 -5 1026.87 415.383 2
 -7 -11 -5 862.16 330.786 1
 7 11 -4 1324.7 471.584 2
 -7 -11 -4 862.312 322.486 1
 7 11 -3 244.19 230.463 2
 -7 -11 -3 -50.017 147.839 1
 7 11 -2 627.566 308.836 2
 -7 -11 -2 131.491 159.292 1
 7 11 -1 1017.86 402.39 2
 -7 -11 -1 -71.5703 133.325 1
 7 11 0 257.195 309.467 2
 -7 -11 0 680.672 314.284 1
 7 11 1 969.513 395.059 2
 -7 -11 1 526.464 277.021 1
 -7 -11 2 911.342 366.081 1
 7 11 2 375.012 265.086 2
 -7 -11 3 -66.7611 122.686 1
 7 11 3 -4.45219 164.288 2
 7 11 4 1059.02 449.482 2
 -7 -11 4 897 351.505 1
 -7 -11 5 1617.51 456.218 1
 -7 -11 6 798.044 324.383 1
 -7 -11 7 687.418 332.806 1
 -7 -11 8 86.011 186.091 1
 -7 -11 9 82.326 173.759 1
 -7 -11 10 1062.35 373.778 1
 7 12 -4 64.0954 127.098 2
 -7 -12 -4 199.535 157.475 1
 7 12 -3 0.78882 198.8 2
 -7 -12 -3 394.472 212.671 1
 7 12 -2 398.999 276.505 2
 -7 -12 -2 51.5529 95.2298 1
 -7 -12 -1 -315.66 206.997 1
 7 12 -1 368.105 308.629 2
 7 12 0 316.361 336.045 2
 -7 -12 0 -143.866 188.219 1
 7 12 1 569.965 349.215 2
 -7 -12 1 360.925 211.369 1
 7 12 2 526.532 299.366 2
 -7 -12 2 -19.2969 182.872 1
 -7 -12 3 -52.2787 111.307 1
 7 12 3 905.368 399.925 2
 -7 -12 4 402.363 224.837 1
 7 12 4 -47.1673 191.686 2
 8 0 -22 827.129 338.272 2
 8 0 -21 1949.91 506.496 2
 8 0 -20 762.071 336.804 2
 8 0 -19 991.229 338.675 2
 8 0 -18 1284.16 362.453 2
 8 0 -17 1126.38 358.883 2
 8 0 -16 3015.32 551.158 2
 8 0 -15 7529.08 845.267 2
 8 0 -14 3241.93 535.403 2
 8 0 -13 1417.31 341.505 2
 8 0 -12 7820.67 761.354 2
 8 0 -11 3166.51 483.781 2
 8 0 -10 3341.06 482.7 2
 8 0 -9 7639 703.618 2
 8 0 -8 4200.51 506.045 2
 8 0 -7 2016.6 343.961 2
 8 0 -6 194.51 128.869 2
 8 0 -5 21590.9 1001.15 2
 8 0 -4 3135.43 370.042 2
 -8 0 -3 16347.1 860.634 1
 8 0 -3 17859.1 843.665 2
 -8 0 -2 10530.3 688.49 1
 8 0 -2 11038.8 640.705 2
 8 0 -1 13459 676.584 2
 -8 0 -1 13142.9 768.386 1
 8 0 0 21611 839.954 2
 -8 0 0 23050.9 1009.32 1
 8 0 1 13628.7 652.655 2
 -8 0 1 12335.4 746.757 1
 -8 0 2 11224.2 729.008 1
 8 0 2 10723.3 573.559 2
 -8 0 3 17752.3 910.542 1
 8 0 3 17895.4 743.454 2
 -8 0 4 2969.87 387.245 1
 -8 0 5 24692.3 1138.14 1
 8 -1 -22 595.137 317.792 2
 8 1 -22 225.431 188.168 2
 8 -1 -21 1767.95 471.633 2
 8 1 -21 3029.85 624.075 2
 8 -1 -20 1403.98 396.508 2
 8 1 -20 1409.16 414.783 2
 8 -1 -19 548.727 255.811 2
 8 1 -19 582.382 269.569 2
 8 1 -18 516.297 267.634 2
 8 -1 -18 241.238 144.86 2
 8 -1 -17 1349.85 385.488 2
 8 1 -17 1228.83 379.311 2
 8 -1 -16 2121.38 464.083 2
 8 1 -16 2277.74 476.469 2
 8 -1 -15 1464.08 375.985 2
 8 1 -15 861.518 278.781 2
 8 -1 -14 -9.83445 66.4292 2
 8 1 -14 118.298 135.645 2
 8 -1 -13 845.982 272.864 2
 8 1 -13 488.98 208.274 2
 8 -1 -12 1630.43 358.172 2
 8 1 -12 1223.85 327.845 2
 8 1 -11 4820.8 616.833 2
 8 -1 -11 4176.89 564.671 2
 8 -1 -10 3055.92 452.305 2
 8 1 -10 3143.98 492.81 2
 8 -1 -9 11377 814.161 2
 8 1 -9 10803.8 866.549 2
 8 -1 -8 119.709 111.511 2
 8 1 -8 82.734 128.629 2
 8 -1 -7 4672.13 483.026 2
 8 1 -7 5102.73 554.37 2
 8 -1 -6 1159.22 240.71 2
 8 1 -6 1062.2 267.448 2
 8 -1 -5 651.884 170.903 2
 8 1 -5 718.608 201.453 2
 -8 -1 -4 7956.97 630.385 1
 8 -1 -4 7712.79 543.907 2
 8 1 -4 7952.26 624.966 2
 -8 -1 -3 14858.2 865.829 1
 8 1 -3 14590 818.144 2
 8 -1 -3 14455.3 701.002 2
 -8 1 -2 1867.67 274.246 1
 8 -1 -2 1329.21 201.184 2
 -8 -1 -2 1280.11 250.57 1
 8 1 -2 1531.74 270.086 2
 8 -1 -1 2001.27 232.251 2
 8 1 -1 1717.71 276.398 2
 -8 -1 -1 1957.34 318.172 1
 -8 1 -1 1560.5 251.197 1
 -8 -1 0 1824.38 322.739 1
 8 -1 0 1293.35 189.488 2
 8 1 0 1777.55 279.295 2
 -8 1 0 1643.32 276.682 1
 -8 -1 1 1794.66 298.447 1
 8 -1 1 1732.06 191 2
 8 1 1 1840.35 279.207 2
 -8 1 1 1844.27 271.491 1
 -8 1 2 1460.6 249.992 1
 8 -1 2 1481.64 176.041 2
 -8 -1 2 1657.14 288.388 1
 8 1 2 1690.9 262.471 2
 -8 1 2 1270.98 197.265 2
 -8 -1 3 14135.7 870.431 1
 -8 1 3 15512.9 815.083 1
 8 -1 3 14417.4 524.234 2
 -8 1 3 12723.2 682.345 2
 -8 -1 4 8412.47 696.222 1
 -8 1 4 8590.78 614.701 1
 8 -1 4 7570.26 393.103 2
 8 -1 5 471.535 105.731 2
 -8 -1 5 809.167 226.955 1
 -8 1 5 621.036 167.357 1
 -8 1 6 966.718 214.868 1
 8 -1 6 1083.63 182.123 2
 8 -1 7 5221.58 398.535 2
 8 -1 8 374.316 167.907 2
 8 -2 -22 620.143 254.224 2
 8 2 -22 643.571 286.736 2
 8 -2 -21 525.551 309.364 2
 8 2 -21 471.718 258.321 2
 8 2 -20 9.86801 146.933 2
 8 -2 -20 54.0015 101.494 2
 8 2 -19 320.028 267.852 2
 8 -2 -19 -34.1362 91.3831 2
 8 -2 -18 89.7462 96.1756 2
 8 2 -18 228.916 177 2
 8 -2 -17 1550.45 414.242 2
 8 2 -17 1083.03 353.164 2
 8 -2 -16 1025.23 334.283 2
 8 2 -16 1150.09 345.452 2
 8 -2 -15 635.374 254.49 2
 8 2 -15 1009.14 331.907 2
 8 -2 -14 697.032 284.972 2
 8 2 -14 646.133 258.405 2
 8 -2 -13 181.179 85.4119 2
 8 2 -13 559.835 238.178 2
 8 -2 -12 1664.93 343.078 2
 8 2 -12 1418.14 353.25 2
 8 -2 -11 714.451 251.233 2
 8 2 -11 1115.58 341.403 2
 8 -2 -10 1438.95 312.459 2
 8 2 -10 1744.32 376.754 2
 8 -2 -9 1789.88 324.13 2
 8 2 -9 2172.03 403.844 2
 8 -2 -8 1283.66 276 2
 8 2 -8 1475.46 333.756 2
 8 2 -7 7316.06 694.287 2
 8 -2 -7 7423.97 598.068 2
 8 2 -6 2681.01 402.802 2
 8 -2 -6 1946.96 292.037 2
 -8 -2 -5 3026.82 409.846 1
 8 2 -5 3643.46 466.524 2
 8 -2 -5 3644.72 371.921 2
 8 -2 -4 450.386 120.003 2
 -8 -2 -4 430.255 156.507 1
 8 2 -4 536.451 186.44 2
 -8 -2 -3 2334.06 369.556 1
 8 2 -3 2257.42 372.072 2
 8 -2 -3 2639.65 281.546 2
 8 2 -2 4014.2 462.534 2
 -8 -2 -2 4057.76 479.068 1
 8 -2 -2 3696.57 299.339 2
 -8 -2 -1 1884.09 329.671 1
 8 2 -1 2143.54 331.973 2
 8 -2 -1 1898.8 189.585 2
 -8 -2 0 426.769 183.244 1
 8 2 0 433.204 162.6 2
 8 -2 0 535.874 103.486 2
 8 2 1 1786.11 297.935 2
 -8 -2 1 1842.71 342.746 1
 -8 2 1 1606.44 231.552 1
 8 2 2 3592.3 415.936 2
 -8 -2 2 3527.71 458.245 1
 -8 2 2 3134.18 279.238 2
 -8 2 2 3948.28 372.385 1
 -8 -2 3 2783.26 422.41 1
 -8 2 3 2310.26 267.953 2
 -8 2 3 2624.17 307.83 1
 -8 2 4 295.445 112.338 2
 -8 -2 4 255.121 136.448 1
 -8 2 4 490.751 140.116 1
 -8 -2 5 3613.47 476.209 1
 -8 2 5 3560.21 378.019 1
 8 -2 5 2666.57 158.703 2
 8 -2 6 2344.04 198.215 2
 -8 2 6 2290.07 304.68 1
 8 -2 7 6663.09 385.998 2
 8 -2 8 2162.45 261.147 2
 8 3 -21 294.344 217.022 2
 8 -3 -21 192.403 160.058 2
 8 3 -20 1257.41 425.193 2
 8 -3 -20 1988.62 476.486 2
 8 -3 -19 2406.2 519.971 2
 8 3 -19 2228.61 547.9 2
 8 -3 -18 117.224 120.527 2
 8 3 -18 394.662 212.524 2
 8 -3 -17 377.345 205.365 2
 8 3 -17 551.077 285.192 2
 8 -3 -16 261.13 193.911 2
 8 3 -16 316.391 232.322 2
 8 -3 -15 564.94 215.662 2
 8 3 -15 453.927 250.614 2
 8 -3 -14 517.784 192.202 2
 8 3 -14 507.561 231.927 2
 8 3 -13 760.261 268.582 2
 8 -3 -13 979.23 286.271 2
 8 -3 -12 1313.79 316.518 2
 8 3 -12 1800.12 422.465 2
 8 -3 -11 239.244 169.355 2
 8 3 -11 305.047 217.974 2
 8 -3 -10 1643.72 323.554 2
 8 3 -10 2189.13 426.147 2
 8 -3 -9 1094.03 250.233 2
 8 3 -9 1543.33 384.1 2
 8 -3 -8 189.101 104.11 2
 8 3 -8 160.749 151.869 2
 8 -3 -7 640.018 171.744 2
 8 3 -7 705.934 227.73 2
 8 3 -6 1389.95 315.425 2
 8 -3 -6 2279.46 308.145 2
 -8 -3 -5 3505.37 466.763 1
 8 3 -5 3716.45 494.835 2
 8 -3 -5 3571.78 355.204 2
 8 -3 -4 664.413 147.897 2
 8 3 -4 657.13 225.465 2
 -8 -3 -4 586.565 195.852 1
 8 3 -3 2819.57 431.588 2
 8 -3 -3 2879.32 267.043 2
 -8 -3 -3 2476.13 391.333 1
 8 3 -2 2322.44 377.449 2
 -8 -3 -2 1627.74 320.115 1
 8 3 -1 1322.91 287.925 2
 -8 -3 -1 1260.54 290.364 1
 -8 -3 0 380.254 167.788 1
 8 3 0 448.32 171.723 2
 -8 3 1 1417.96 202.658 1
 8 3 1 1477.91 292.88 2
 -8 -3 1 1287.13 297.619 1
 -8 3 1 1249.89 125.409 2
 8 3 2 1870.03 331.818 2
 -8 3 2 1979.5 202.992 2
 -8 -3 2 1924.71 351.998 1
 -8 3 2 2184.82 247.4 1
 -8 3 3 2479.63 273.279 2
 -8 -3 3 2516.42 426.384 1
 -8 3 3 2437.37 265.316 1
 -8 -3 4 545.334 221.538 1
 -8 3 4 461.02 133.838 2
 -8 3 4 662.635 143.286 1
 -8 -3 5 4698.57 585.066 1
 -8 3 5 3601.3 337.768 1
 -8 -3 6 1522.75 351.465 1
 -8 3 6 1829.61 260.695 1
 -8 3 7 559.339 144.077 1
 8 -3 7 312.058 59.241 2
 8 4 -21 3921.55 734.671 2
 8 4 -20 1272.77 422.162 2
 8 4 -19 1957.42 528.761 2
 8 4 -18 2364.56 540.858 2
 8 4 -17 413.378 252.771 2
 8 4 -16 1324.39 412.411 2
 8 4 -15 1968.51 477.512 2
 8 4 -14 598.744 243.937 2
 8 4 -13 4188.18 648.789 2
 8 4 -12 627.862 276.725 2
 8 4 -11 5637.28 734.106 2
 8 4 -10 528.029 238.812 2
 8 4 -9 4141.22 606.946 2
 8 4 -8 2174.3 424.168 2
 8 4 -7 3079.99 495.977 2
 -8 -4 -6 1230.41 320.156 1
 8 4 -6 1278.82 323.78 2
 -8 -4 -5 5270.08 585.803 1
 8 4 -5 6445.92 703.866 2
 8 4 -4 629.143 238.723 2
 -8 -4 -4 303.421 174.367 1
 8 4 -3 9619.2 843.233 2
 -8 -4 -3 10539.4 841.231 1
 8 4 -2 708.853 224.972 2
 -8 -4 -2 1035.42 263.928 1
 8 4 -1 6066.18 655.466 2
 -8 -4 -1 5970.47 634.372 1
 -8 -4 0 437.063 221.613 1
 8 4 0 495.887 202.013 2
 8 4 1 5495.09 614.218 2
 8 -4 1 4941.77 397.397 1
 -8 4 1 3800.98 200.809 2
 -8 -4 1 5697.99 637.102 1
 -8 4 2 790.997 127.45 2
 8 4 2 1304.59 304.822 2
 8 -4 2 854.07 184.967 1
 -8 -4 2 1338.82 314.776 1
 -8 4 3 9272.15 430.615 1
 -8 4 3 8063.82 476.066 2
 -8 -4 3 10560.1 866.286 1
 -8 -4 4 605.648 257.121 1
 -8 4 4 346.592 114.013 2
 -8 4 4 488.963 107.825 1
 -8 -4 5 5892.01 682.98 1
 -8 4 5 5871.46 373.497 1
 -8 -4 6 971.846 289.897 1
 -8 4 6 1201.53 185.308 1
 -8 4 7 2876.42 297.089 1
 8 5 -20 240.83 174.41 2
 8 5 -19 2663.71 609.665 2
 8 5 -18 1895.07 506.567 2
 8 5 -17 641.996 311.026 2
 8 5 -16 1099.75 370.493 2
 8 5 -15 5745.31 828.058 2
 8 5 -14 2031.35 483.616 2
 8 5 -13 3022.16 578.048 2
 8 5 -12 963.833 319.224 2
 8 5 -11 6077.06 777.388 2
 8 5 -10 973.001 315.174 2
 8 5 -9 21891.8 1444.16 2
 8 5 -8 1640.88 398.508 2
 8 5 -7 4954.38 674.161 2
 8 5 -6 805.537 286.264 2
 -8 -5 -6 809.614 292.636 1
 8 5 -5 737.821 281.073 2
 -8 -5 -5 1012.31 273.461 1
 8 5 -4 289.779 187.022 2
 -8 -5 -4 207.478 118.134 1
 8 5 -3 9482.31 881.343 2
 -8 -5 -3 10248.4 867.008 1
 8 5 -2 1201.98 325.572 2
 -8 -5 -2 1158.27 324.218 1
 -8 -5 -1 3575.95 518.427 1
 8 5 -1 3898.38 567.104 2
 -8 -5 0 3106.25 485.848 1
 8 5 0 2989.9 485.532 2
 8 5 1 3668.33 549.573 2
 -8 5 1 2449.35 182.56 2
 -8 -5 1 4220.19 571.466 1
 -8 5 2 766.728 135.638 2
 8 -5 2 948.776 167.026 1
 8 5 2 1343.32 338.583 2
 -8 -5 2 1436.06 323.709 1
 -8 5 3 7269.2 466.178 2
 8 -5 3 7860.95 517.551 1
 -8 -5 4 253.689 192.932 1
 -8 5 4 241.676 105.615 2
 -8 -5 5 837.184 279.009 1
 -8 5 5 252.263 55.5029 1
 -8 -5 6 680.621 243.995 1
 -8 5 6 371.892 76.7011 1
 -8 -5 7 5594.2 710.198 1
 -8 5 7 3850.91 283.218 1
 -8 5 8 1615.53 202.392 1
 8 6 -19 2214.52 561.772 2
 8 6 -18 1012.54 407.494 2
 8 6 -17 60.677 182.829 2
 8 6 -16 469.006 258.957 2
 8 6 -15 4172.02 728.232 2
 8 6 -14 336.954 250.974 2
 8 6 -13 12.6349 119.466 2
 8 6 -12 11.6924 89.5871 2
 8 6 -11 376.13 222.675 2
 8 6 -10 801.229 301.273 2
 8 6 -9 4725.02 693.244 2
 8 6 -8 1982.27 441.058 2
 8 6 -7 3044.47 565.327 2
 -8 -6 -6 4702.74 604.004 1
 8 6 -6 3633.71 599.729 2
 -8 -6 -5 5268.55 645.774 1
 8 6 -5 5004.45 697.034 2
 8 6 -4 528.377 230.859 2
 -8 -6 -4 957.605 294.546 1
 8 6 -3 18910 1322.94 2
 -8 -6 -3 19159.8 1218.06 1
 8 6 -2 1523.57 368.21 2
 -8 -6 -2 1525.43 356.685 1
 8 6 -1 689.79 264.095 2
 -8 -6 -1 686.59 243.4 1
 -8 -6 0 878.131 312.452 1
 8 6 0 763.291 284.754 2
 -8 6 0 1050.16 105.938 2
 8 6 1 382.035 199.682 2
 -8 -6 1 476.837 212.665 1
 8 6 2 1553.6 361.525 2
 -8 -6 2 1219.23 346.27 1
 -8 -6 3 19859.6 1313.27 1
 -8 -6 4 1300.55 347.645 1
 -8 -6 5 6113.41 757.873 1
 -8 -6 6 3893.47 611.239 1
 -8 -6 7 2493.21 514.548 1
 -8 -6 8 2287.83 474.727 1
 8 7 -18 -228.495 207.739 2
 8 7 -17 125.253 180.645 2
 8 7 -16 294.075 239.3 2
 8 7 -15 452.321 280.637 2
 8 7 -14 163.701 183.743 2
 8 7 -13 450.068 261.889 2
 8 7 -12 187.523 140.055 2
 8 7 -11 1283.68 389.937 2
 8 7 -10 1163.54 371.454 2
 8 7 -9 437.607 244.933 2
 8 7 -8 -114.239 143.137 2
 8 7 -7 508.165 265.028 2
 8 7 -6 98.5118 121.244 2
 -8 -7 -6 258.789 180.975 1
 8 7 -5 1206.04 369.861 2
 -8 -7 -5 1817 383.204 1
 -8 -7 -4 2390.59 438.191 1
 8 7 -4 3451.11 605.103 2
 -8 -7 -3 245.667 170.016 1
 8 7 -3 555.151 267.707 2
 8 7 -2 1512.48 422.193 2
 -8 -7 -2 1587.07 376.103 1
 8 7 -1 1314.02 376.5 2
 -8 -7 -1 1488.2 363.689 1
 -8 -7 0 281.31 191.334 1
 8 7 0 220.02 114.631 2
 -8 -7 1 1514.62 388.765 1
 8 7 1 1433.27 405.629 2
 8 7 2 1673.51 428.562 2
 -8 -7 2 1227.57 307.473 1
 -8 -7 3 753.415 269.847 1
 -8 -7 4 2847.15 515.963 1
 -8 -7 5 1722.73 429.896 1
 -8 -7 6 -89.5603 154.872 1
 -8 -7 7 338.38 194.051 1
 -8 -7 8 344.437 247.526 1
 -8 -7 9 675.248 305.1 1
 8 8 -16 -55.4823 190.2 2
 8 8 -15 229.699 214.265 2
 8 8 -14 33.664 150.778 2
 8 8 -13 446.614 306.929 2
 8 8 -12 236.085 178.393 2
 8 8 -11 1261.98 425.726 2
 8 8 -10 198.632 181.223 2
 8 8 -9 864.616 318.032 2
 8 8 -8 1230.86 413.451 2
 8 8 -7 177.646 148.259 2
 8 8 -6 2664.75 585.364 2
 -8 -8 -6 2870.28 504.412 1
 8 8 -5 787.755 303.817 2
 -8 -8 -5 1140.24 321.53 1
 8 8 -4 1286.9 424.8 2
 -8 -8 -4 1643.53 398.989 1
 -8 -8 -3 2797.25 526.275 1
 8 8 -3 3265.81 620.233 2
 8 8 -2 221.226 243.402 2
 -8 -8 -2 978.532 307.463 1
 8 8 -1 83.7185 121.998 2
 -8 -8 -1 187.258 153.864 1
 -8 -8 0 2287.26 480.244 1
 8 8 0 1867.2 490.787 2
 -8 -8 1 386.611 209.162 1
 8 8 1 290.562 187.094 2
 8 8 2 13.149 155.56 2
 -8 -8 2 282.697 203.728 1
 8 8 3 3423.09 625.157 2
 -8 -8 3 3556.85 614.649 1
 -8 -8 4 1702.77 438.115 1
 -8 -8 5 754.925 293.555 1
 -8 -8 6 3415.61 620.317 1
 -8 -8 7 -56.5125 147.569 1
 -8 -8 8 1822.17 513.796 1
 -8 -8 9 2063.76 552.646 1
 -8 -8 10 504.925 219.959 1
 8 9 -14 -49.9706 127.788 2
 8 9 -13 705.295 307.43 2
 8 9 -12 155.056 218.111 2
 8 9 -11 272.221 170.726 2
 8 9 -10 358.556 255.891 2
 8 9 -9 2163.8 563.681 2
 8 9 -8 1223.83 458.326 2
 8 9 -7 3561.79 702.052 2
 -8 -9 -6 807.369 308.714 1
 8 9 -6 462.402 278.579 2
 8 9 -5 898.043 356.794 2
 -8 -9 -5 774.338 284.04 1
 8 9 -4 288.495 219.1 2
 -8 -9 -4 1033.93 328.018 1
 8 9 -3 1925.02 508.74 2
 -8 -9 -3 1515.85 406.454 1
 8 9 -2 13.4126 112.494 2
 -8 -9 -2 -177.906 179.315 1
 8 9 -1 120.729 135.89 2
 -8 -9 -1 61.9606 138.23 1
 8 9 0 -33.2857 106.817 2
 -8 -9 0 235.91 145.703 1
 -8 -9 1 870.225 323.741 1
 8 9 1 332.152 233.723 2
 -8 -9 2 507.946 240.243 1
 8 9 2 533.639 304.894 2
 8 9 3 1334.96 424.163 2
 -8 -9 3 1718.87 437.714 1
 -8 -9 4 744.773 310.283 1
 -8 -9 5 882.559 324.905 1
 -8 -9 6 282.828 164.497 1
 -8 -9 7 3262.67 661.1 1
 -8 -9 8 1013.37 331.436 1
 -8 -9 9 2828.33 636 1
 -8 -9 10 18.4703 190.141 1
 -8 -9 11 -136.735 211.527 1
 -8 -9 12 -325.434 263.507 1
 8 10 -12 366.269 221.209 2
 8 10 -11 928.456 422.083 2
 8 10 -10 315.055 237.183 2
 8 10 -9 3257.91 712.742 2
 8 10 -8 559.157 353.244 2
 8 10 -7 298.982 230.306 2
 8 10 -6 672.824 314.869 2
 8 10 -5 1664.31 471.581 2
 -8 -10 -5 1851.9 445.743 1
 -8 -10 -4 1603.79 395.754 1
 8 10 -4 1889.57 535.035 2
 -8 -10 -3 1517.23 409.853 1
 8 10 -3 1456.83 428.66 2
 -8 -10 -2 -174.052 173.003 1
 8 10 -2 -167.488 177.6 2
 8 10 -1 1569 476.271 2
 -8 -10 -1 1160.56 363.626 1
 8 10 0 212.43 227.032 2
 -8 -10 0 631.318 292.866 1
 -8 -10 1 1094.35 362.089 1
 8 10 1 1443.39 447.088 2
 -8 -10 2 -43.3881 102.826 1
 8 10 2 -105.232 219.077 2
 -8 -10 3 1712.86 441.525 1
 8 10 3 1462.09 500.248 2
 8 10 4 2244.58 581.756 2
 -8 -10 4 2460.36 561.07 1
 -8 -10 5 1716.6 486.452 1
 -8 -10 6 166.676 160.278 1
 -8 -10 7 769.461 331.74 1
 -8 -10 8 344.897 222.78 1
 -8 -10 9 2220.95 586.941 1
 -8 -10 10 790.048 317.674 1
 -8 -10 11 488.206 307.216 1
 -8 -10 12 350.861 224.775 1
 8 11 -8 351.89 257.652 2
 8 11 -7 -242.655 211.691 2
 8 11 -6 -184.907 147.412 2
 8 11 -5 1693.71 527.042 2
 -8 -11 -5 1252.99 382.179 1
 8 11 -4 361.596 281.803 2
 -8 -11 -4 73.1052 110.178 1
 8 11 -3 1171.92 445.847 2
 -8 -11 -3 713.116 311.53 1
 8 11 -2 69.1815 130.421 2
 -8 -11 -2 -192.544 169.713 1
 -8 -11 -1 -10.7041 106.755 1
 8 11 -1 300.512 261.13 2
 8 11 0 149.822 190.305 2
 -8 -11 0 190.144 85.5401 1
 8 11 1 192.454 172.964 2
 -8 -11 1 192.735 189.442 1
 -8 -11 2 97.4883 237.762 1
 8 11 2 -13.1866 145.407 2
 -8 -11 3 1096.52 391.873 1
 8 11 3 521.858 304.541 2
 -8 -11 4 109.436 149.123 1
 8 11 4 264.594 188.347 2
 8 11 5 1011.16 441.866 2
 -8 -11 5 928.962 406.027 1
 -8 -11 6 0.68423 120.721 1
 -8 -11 7 135.185 189.912 1
 -8 -11 8 32.2469 138.45 1
 9 0 -21 116.225 134.269 2
 9 0 -20 54.5695 185.073 2
 9 0 -19 -101.4 120.018 2
 9 0 -18 35.2916 183.235 2
 9 0 -17 -32.9728 85.5476 2
 9 0 -16 81.1207 124.183 2
 9 0 -15 118.337 84.776 2
 9 0 -14 51.7981 92.5713 2
 9 0 -13 13.6388 136.19 2
 9 0 -12 240.212 189.877 2
 9 0 -11 81.8469 57.7778 2
 9 0 -10 168.079 137.548 2
 9 0 -9 29.6066 99.5318 2
 9 0 -8 2011.28 362.626 2
 9 0 -7 -34.3794 111.81 2
 9 0 -6 82.8005 66.8663 2
 9 0 -5 24.3786 49.4314 2
 9 0 -4 -40.3194 51.7352 2
 -9 0 -3 94.8821 67.0864 1
 9 0 -3 130.652 92.7097 2
 -9 0 -2 -75.9575 86.1475 1
 9 0 -2 -78.3114 80.2728 2
 -9 0 -1 40.2099 103.396 1
 9 0 -1 -58.2417 47.0933 2
 -9 0 0 474.028 179.525 1
 9 0 0 596.399 187.517 2
 9 0 1 110.697 61.7455 2
 -9 0 1 39.9383 61.2144 1
 -9 0 2 10.9191 129.837 1
 9 0 2 214.983 108.875 2
 9 0 3 36.8366 91.3874 2
 -9 0 3 30.1653 59.6258 1
 9 0 4 -58.2883 64.8548 2
 -9 0 4 22.8848 82.4254 1
 -9 0 5 -88.6275 125.972 1
 -9 0 6 -66.9892 73.5945 1
 -9 0 7 -21.3968 79.7261 1
 9 -1 -21 616.852 276.24 2
 9 1 -21 769.89 320.854 2
 9 -1 -20 336.466 187.706 2
 9 1 -20 672.063 298.457 2
 9 -1 -19 484.995 209.261 2
 9 1 -19 234.539 247.452 2
 9 -1 -18 61.9025 108.542 2
 9 1 -18 179.449 112.651 2
 9 -1 -17 1049.55 353.299 2
 9 1 -17 1147.39 370.274 2
 9 -1 -16 243.048 169.105 2
 9 1 -16 27.822 78.096 2
 9 -1 -15 897.811 284.956 2
 9 1 -15 1005.13 319.931 2
 9 -1 -14 1506.87 381.749 2
 9 1 -14 1694.17 418.325 2
 9 1 -13 1903.55 409.251 2
 9 -1 -13 2862.17 496.318 2
 9 1 -12 3343.63 556.087 2
 9 -1 -12 3692.84 544.073 2
 9 1 -11 5029.59 640.181 2
 9 -1 -11 5386.68 632.936 2
 9 -1 -10 2662.45 441.962 2
 9 1 -10 1945.76 404.819 2
 9 -1 -9 1062.55 258.399 2
 9 1 -9 1063.78 280.396 2
 9 -1 -8 1398.2 281.8 2
 9 1 -8 1422.14 316.418 2
 9 -1 -7 5181.81 525.009 2
 9 1 -7 5510.52 588.659 2
 9 -1 -6 893.466 210.291 2
 9 1 -6 1089.72 264.903 2
 9 -1 -5 2686.88 359.454 2
 9 1 -5 3014.38 415.579 2
 9 -1 -4 2062.72 301.62 2
 -9 -1 -4 1979.49 327.695 1
 9 1 -4 2162.28 354.777 2
 -9 -1 -3 2555.36 369.44 1
 9 -1 -3 2239.32 288.277 2
 9 1 -3 2713.62 377.872 2
 9 -1 -2 1410.17 221.758 2
 -9 -1 -2 1162 257.694 1
 -9 1 -2 1242.89 228.336 1
 9 1 -2 1475.29 285.783 2
 -9 1 -1 11482 717.568 1
 9 -1 -1 11394.4 578.688 2
 9 1 -1 12148.3 765.719 2
 -9 -1 -1 12428 834.351 1
 9 -1 0 13258.7 593.985 2
 9 1 0 14895 828.578 2
 -9 -1 0 15940.3 949.534 1
 -9 1 0 15164.2 834.277 1
 9 -1 1 11545.7 530.102 2
 9 1 1 12042.8 734.239 2
 -9 -1 1 11811.1 817.005 1
 -9 1 1 11597.7 715.74 1
 -9 1 2 1519.64 263.598 1
 9 1 2 1524.55 264.74 2
 9 -1 2 1438.86 179.442 2
 -9 -1 2 1584.85 305.262 1
 9 -1 3 2756.13 248.553 2
 -9 -1 3 2324.73 375.237 1
 -9 1 3 2307.74 332.272 1
 9 1 3 2820.38 356.861 2
 -9 -1 4 2008.62 357.7 1
 -9 1 4 2310.06 339.944 1
 9 -1 4 2288.47 231.591 2
 -9 -1 5 2723.82 429.721 1
 -9 1 5 3421.23 426.249 1
 9 -1 5 2784.73 262.147 2
 9 -1 5 3209.41 277.139 2
 9 -1 6 819.629 152.862 2
 -9 -1 6 669.216 217.832 1
 -9 1 6 1037.6 256.135 1
 -9 -1 7 5535.22 635.071 1
 -9 1 7 5081.92 540.916 1
 9 -1 7 4558.04 378.167 2
 9 -2 -21 1413.79 421.755 2
 9 2 -21 1859.76 532.868 2
 9 -2 -20 716.225 281.298 2
 9 2 -20 681.379 341.536 2
 9 2 -19 4327.62 736.02 2
 9 -2 -19 3352.2 623.49 2
 9 -2 -18 301.969 167.987 2
 9 2 -18 216.914 212.271 2
 9 2 -17 3981.38 684.295 2
 9 -2 -17 4161.58 662.783 2
 9 -2 -16 1882.66 418.883 2
 9 2 -16 2158.63 505.556 2
 9 -2 -15 359.027 171.398 2
 9 2 -15 379.285 204.754 2
 9 -2 -14 2014.52 425.95 2
 9 2 -14 2287.37 492.554 2
 9 2 -13 6875.3 827.221 2
 9 -2 -13 6541.34 718.75 2
 9 2 -12 6533.17 778.705 2
 9 -2 -12 6612.78 698.115 2
 9 2 -11 9530.91 919.006 2
 9 -2 -11 8921.34 779.813 2
 9 -2 -10 939.061 254.679 2
 9 2 -10 621.582 245.551 2
 9 -2 -9 181.827 140.003 2
 9 2 -9 114.589 119.146 2
 9 -2 -8 681.357 206.285 2
 9 2 -8 954.69 275.752 2
 9 2 -7 3377.81 485.667 2
 9 -2 -7 3455.7 418.992 2
 9 2 -6 4561.82 560.872 2
 9 -2 -6 4441.17 453.084 2
 -9 -2 -5 5023.43 558.118 1
 9 2 -5 5732.89 603.638 2
 9 -2 -5 5496.64 477.83 2
 9 -2 -4 1723.48 258.923 2
 -9 -2 -4 2140.07 357.084 1
 9 2 -4 1999.4 354.562 2
 -9 -2 -3 911.265 238.056 1
 9 2 -3 1324.58 284.857 2
 9 -2 -3 1083.95 190.518 2
 -9 -2 -2 456.39 185.621 1
 9 2 -2 1083.47 273.935 2
 9 -2 -2 737.593 151.747 2
 9 2 -1 19028.6 1038.46 2
 -9 -2 -1 18557.7 1063.28 1
 9 -2 -1 16590.4 588.964 2
 -9 2 0 969.859 197.709 1
 9 2 0 900.666 241.8 2
 -9 -2 0 911.14 239.954 1
 9 -2 0 960.282 123.823 2
 -9 -2 1 19685.7 1105.73 1
 9 2 1 18030.5 993.79 2
 -9 2 1 18428.8 853.14 1
 9 2 2 1167.31 261.828 2
 -9 2 2 628.773 131.754 2
 -9 2 2 768.294 171.187 1
 -9 -2 2 593.793 232.294 1
 -9 2 3 1027.07 192.2 1
 -9 2 3 1158.99 194.207 2
 9 2 3 1107.87 244.849 2
 -9 -2 3 827.47 241.746 1
 -9 -2 4 1963.55 380.3 1
 -9 2 4 2110.16 309.753 1
 -9 -2 5 6600.73 690.366 1
 -9 2 5 6012.88 509.673 1
 9 -2 6 2750.19 192.903 2
 -9 -2 6 5052.03 628.574 1
 -9 2 6 4598.62 463.556 1
 9 -2 6 3510.66 213.414 2
 -9 -2 7 3066.59 489.945 1
 -9 2 7 3832.32 441.052 1
 9 3 -21 218.406 185.46 2
 9 -3 -21 -481.745 254.921 2
 9 -3 -20 -153.034 151.539 2
 9 3 -20 37.0746 84.2569 2
 9 3 -19 4375.86 761.37 2
 9 -3 -19 3984.39 678.728 2
 9 -3 -18 231.007 182.474 2
 9 3 -18 320.885 227.133 2
 9 -3 -17 2465.38 518.973 2
 9 3 -17 3536.33 642.874 2
 9 -3 -16 138.828 174.659 2
 9 3 -16 343.189 181.232 2
 9 -3 -15 480.966 221.072 2
 9 3 -15 436.183 232.897 2
 9 -3 -14 3462.51 545.746 2
 9 3 -14 3095.42 589.63 2
 9 3 -13 11235.5 1071.87 2
 9 -3 -13 11147.4 945.633 2
 9 -3 -12 1195.32 304.183 2
 9 3 -12 814.336 270.731 2
 9 3 -11 5921.11 750.55 2
 9 -3 -11 5046.93 592.435 2
 9 -3 -10 1934.65 354.618 2
 9 3 -10 2151.23 445.527 2
 9 3 -9 2021.28 414.586 2
 9 -3 -9 1821.61 324.954 2
 9 -3 -8 808.77 206.431 2
 9 3 -8 971.806 287.131 2
 9 3 -7 7762.92 782.77 2
 9 -3 -7 8116.05 616.982 2
 9 3 -6 4521.65 592.238 2
 9 -3 -6 4477.56 443.985 2
 -9 -3 -5 10481.1 827.181 1
 9 3 -5 10251.8 873.621 2
 9 -3 -5 10972.9 633.227 2
 9 3 -4 413.266 195.554 2
 9 -3 -4 562.042 144.406 2
 -9 -3 -4 568.935 200.182 1
 9 -3 -3 586.803 134.607 2
 9 3 -3 515.717 210.758 2
 -9 -3 -3 444.374 166.877 1
 9 3 -2 250.589 110.116 2
 -9 -3 -2 470.318 211.289 1
 9 3 -1 5895.15 625.765 2
 -9 -3 -1 5918.9 629.509 1
 -9 -3 0 995.008 295.976 1
 9 3 0 913.251 275.231 2
 -9 3 1 5066.27 411.458 1
 -9 -3 1 5067.16 591.441 1
 9 3 1 5373.92 595.16 2
 -9 3 2 132.754 54.8974 2
 -9 3 2 210.777 95.9779 1
 9 3 2 262.212 154.502 2
 -9 -3 2 -44.4103 115.761 1
 -9 3 3 213.345 77.5947 2
 9 3 3 274.674 132.441 2
 -9 -3 3 318.449 199.882 1
 -9 3 3 551.667 150.321 1
 -9 3 4 406.642 120.59 2
 -9 3 4 374.751 109.67 1
 -9 -3 4 663.513 201.425 1
 -9 -3 5 11562.1 963.223 1
 -9 3 5 10936.7 655.429 1
 -9 -3 6 5277.11 665.154 1
 -9 3 6 4412.98 419.58 1
 -9 -3 7 7883.91 820.815 1
 -9 3 7 8606.86 608.923 1
 -9 3 8 597.937 166.491 1
 9 4 -20 29.902 147.013 2
 9 4 -19 1011.62 369.481 2
 9 4 -18 55.8305 106.657 2
 9 4 -17 1871.44 495.087 2
 9 4 -16 351.235 192.665 2
 9 4 -15 854.498 340.582 2
 9 4 -14 580.417 261.042 2
 9 4 -13 2205.6 508.542 2
 9 4 -12 1044.28 354.142 2
 9 4 -11 6297.21 800.032 2
 9 4 -10 1579.96 381.7 2
 9 4 -9 172.248 131.015 2
 9 4 -8 1420.76 376.001 2
 9 4 -7 2018.24 423.501 2
 -9 -4 -6 1056.2 281.669 1
 9 4 -6 1222.64 337.062 2
 9 4 -5 1236.33 343.793 2
 -9 -4 -5 1737.49 363.737 1
 -9 -4 -4 3059.55 472.53 1
 9 4 -4 2964.72 494.504 2
 9 4 -3 641.583 232.138 2
 -9 -4 -3 244.731 167.475 1
 9 4 -2 1489.28 342.509 2
 -9 -4 -2 1665.98 344.22 1
 9 4 -1 3043.56 482 2
 -9 -4 -1 3118.46 471.059 1
 -9 -4 0 2168.13 428.912 1
 9 4 0 1823.37 419.408 2
 -9 -4 1 3466.7 512.948 1
 9 4 1 3663.74 527.011 2
 9 4 2 1741.98 357.629 2
 -9 4 2 1444.4 158.461 2
 -9 -4 2 1946.56 403.063 1
 -9 4 3 350.939 91.5624 1
 -9 -4 3 261.416 164.161 1
 -9 4 3 399.159 106.991 2
 -9 4 4 1919.66 255.512 2
 -9 -4 4 2904.12 497.696 1
 -9 4 4 2255.74 244.83 1
 -9 4 5 1156.97 188.561 1
 -9 -4 5 1282.43 342.066 1
 -9 -4 6 1478.66 361.394 1
 -9 4 6 788.957 159.892 1
 -9 -4 7 1848.54 406.389 1
 -9 4 7 2348.14 287.812 1
 -9 -4 8 803.235 289.245 1
 -9 4 8 594.857 156.564 1
 -9 4 9 241.865 99.9108 1
 9 5 -19 1.36711 180.879 2
 9 5 -18 703.454 311.468 2
 9 5 -17 425.739 258.065 2
 9 5 -16 212.526 148.934 2
 9 5 -15 798.069 319.652 2
 9 5 -14 1910.88 479.719 2
 9 5 -13 61.0024 152.972 2
 9 5 -12 132.444 80.0922 2
 9 5 -11 546.377 282.985 2
 9 5 -10 2308.6 503.122 2
 9 5 -9 297.135 191.938 2
 9 5 -8 -104.126 149.539 2
 9 5 -7 382.322 170.904 2
 -9 -5 -6 1188.46 302.567 1
 9 5 -6 1098.06 368.978 2
 9 5 -5 159.286 195.206 2
 -9 -5 -5 329.796 205.998 1
 9 5 -4 287.691 171.89 2
 -9 -5 -4 398.489 208.348 1
 -9 -5 -3 -109.521 172.666 1
 9 5 -3 474.347 219.231 2
 9 5 -2 1264.26 329.547 2
 -9 -5 -2 1509.64 361.199 1
 9 5 -1 1036.99 294.466 2
 -9 -5 -1 1506.58 345.44 1
 9 5 0 2688.07 520.995 2
 -9 -5 0 3001.9 519.411 1
 -9 -5 1 1339.94 330.764 1
 9 5 1 1220.2 336.106 2
 9 5 2 1322.88 336.135 2
 -9 -5 2 1391.2 358.638 1
 9 5 3 220.708 129.432 2
 -9 -5 3 151.334 158.927 1
 -9 -5 4 321.516 196.905 1
 -9 5 5 120.966 54.4348 1
 -9 -5 5 322.026 225.476 1
 -9 -5 6 1149.6 357.931 1
 -9 -5 7 451.648 202.959 1
 -9 -5 8 40.445 177.607 1
 9 6 -18 -269.78 217.123 2
 9 6 -17 291.059 193.524 2
 9 6 -16 367.354 236.192 2
 9 6 -15 937.662 383.589 2
 9 6 -14 22.8444 105.534 2
 9 6 -13 610.254 295.442 2
 9 6 -12 251.472 193.511 2
 9 6 -11 2191.18 500.03 2
 9 6 -10 1159.4 425.08 2
 9 6 -9 1551.64 413.294 2
 9 6 -8 677.938 272.591 2
 9 6 -7 953.08 308.254 2
 9 6 -6 961.026 373.283 2
 -9 -6 -6 1780.18 386.718 1
 -9 -6 -5 5060.7 651.652 1
 9 6 -5 4114.51 653.701 2
 9 6 -4 1050.61 346.956 2
 -9 -6 -4 1354.13 330.81 1
 9 6 -3 4007.85 645.575 2
 -9 -6 -3 4042.56 591.391 1
 9 6 -2 1005.21 307.479 2
 -9 -6 -2 1630.58 389.852 1
 9 6 -1 2351.35 478.834 2
 -9 -6 -1 2686.57 483.124 1
 -9 -6 0 1167.79 340.173 1
 9 6 0 1040.26 337.248 2
 -9 -6 1 1824.08 402.101 1
 9 6 1 2121.84 453.543 2
 9 6 2 1080.21 401.738 2
 -9 -6 2 570.655 272.538 1
 9 6 3 4131.42 633.816 2
 -9 -6 3 3756.85 609.185 1
 -9 -6 4 691.338 289.999 1
 -9 -6 5 5063.25 713.804 1
 -9 -6 6 1455.92 425.042 1
 -9 -6 7 891.931 288.136 1
 -9 -6 8 508.405 234.483 1
 -9 -6 9 1300.27 382.572 1
 9 7 -17 2206.84 578.255 2
 9 7 -16 815.969 324.98 2
 9 7 -15 619.683 260.14 2
 9 7 -14 256.328 246.531 2
 9 7 -13 932.157 350.907 2
 9 7 -12 27.0748 129.426 2
 9 7 -11 3956.43 736.786 2
 9 7 -10 2584.97 556.539 2
 9 7 -9 1353.52 407.043 2
 9 7 -8 1022.41 375.922 2
 9 7 -7 1173.79 392.553 2
 9 7 -6 332.683 184.184 2
 -9 -7 -6 634.002 235.634 1
 -9 -7 -5 3418.78 556.269 1
 9 7 -5 3397.3 621.503 2
 9 7 -4 334.369 211.567 2
 -9 -7 -4 556.643 220.142 1
 -9 -7 -3 1302.45 369.587 1
 9 7 -3 2698.93 552.916 2
 9 7 -2 213.878 193.967 2
 -9 -7 -2 311.382 173.664 1
 9 7 -1 8328.45 966.866 2
 -9 -7 -1 9626.88 943.014 1
 -9 -7 0 131.632 122.663 1
 9 7 0 -156.134 155.74 2
 -9 -7 1 10476 1007.23 1
 9 7 1 10287.3 1069.56 2
 9 7 2 397.089 232.143 2
 -9 -7 2 337.416 249.398 1
 9 7 3 2324.38 511.145 2
 -9 -7 3 1772.54 425.367 1
 -9 -7 4 508.851 219.864 1
 -9 -7 5 4091.45 671.488 1
 -9 -7 6 318.102 218.004 1
 -9 -7 7 1666.95 439.676 1
 -9 -7 8 774.691 339.612 1
 -9 -7 9 1689.27 468.707 1
 -9 -7 10 2803.84 603.45 1
 9 8 -15 152.123 97.3588 2
 9 8 -14 147.126 180.165 2
 9 8 -13 520.331 306.261 2
 9 8 -12 241.472 268.162 2
 9 8 -11 2557.78 601.523 2
 9 8 -10 650.034 337.617 2
 9 8 -9 117.128 198.946 2
 9 8 -8 1081.26 366.008 2
 9 8 -7 3271.34 672.899 2
 -9 -8 -6 2682.52 511.319 1
 9 8 -6 1596.53 475.221 2
 9 8 -5 2551.49 582.911 2
 -9 -8 -5 2955.75 532.928 1
 9 8 -4 -58.8122 145.415 2
 -9 -8 -4 400.428 192.21 1
 9 8 -3 347.514 231.913 2
 -9 -8 -3 489.045 217.123 1
 9 8 -2 26.0794 147.76 2
 -9 -8 -2 11.3875 122.599 1
 9 8 -1 6236.43 886.018 2
 -9 -8 -1 5259.33 726.574 1
 9 8 0 1732.73 510.901 2
 -9 -8 0 1855.08 457.275 1
 -9 -8 1 4669.27 711.784 1
 9 8 1 5211.49 800.644 2
 -9 -8 2 -240.772 157.477 1
 9 8 2 59.0081 101.4 2
 9 8 3 204.48 170.484 2
 -9 -8 3 819.777 316.51 1
 9 8 4 493.256 234.147 2
 -9 -8 4 502.438 228.836 1
 -9 -8 5 2756.51 574.153 1
 -9 -8 6 1860.78 507.369 1
 -9 -8 7 3786.69 677.016 1
 -9 -8 8 1473.94 519.345 1
 -9 -8 9 301.963 183.912 1
 -9 -8 10 201.811 184.045 1
 -9 -8 11 3123.59 673.083 1
 -9 -8 12 -45.1055 142.547 1
 9 9 -13 -31.9536 211.555 2
 9 9 -12 457.505 249.229 2
 9 9 -11 358.186 260.405 2
 9 9 -10 250.254 267.516 2
 9 9 -9 412.408 240.304 2
 9 9 -8 -49.9118 122.607 2
 9 9 -7 1082.48 365.391 2
 9 9 -6 194.531 227.089 2
 -9 -9 -6 619.131 258.612 1
 9 9 -5 1522.6 490.88 2
 -9 -9 -5 1016.13 355.226 1
 9 9 -4 277.743 199.105 2
 -9 -9 -4 -72.2002 184.933 1
 9 9 -3 668.373 296.764 2
 -9 -9 -3 521.295 265.044 1
 -9 -9 -2 117.813 146.546 1
 9 9 -2 93.0983 172.482 2
 9 9 -1 1605.46 470.75 2
 -9 -9 -1 1624.21 442.19 1
 9 9 0 84.2275 123.423 2
 -9 -9 0 169.917 179.855 1
 -9 -9 1 2717.37 561.979 1
 9 9 1 2112.69 530.209 2
 -9 -9 2 63.6907 161.582 1
 9 9 2 39.039 125.026 2
 9 9 3 129.185 118.76 2
 -9 -9 3 208.224 157.589 1
 9 9 4 157.183 225.149 2
 -9 -9 4 248.491 157.692 1
 -9 -9 5 2037.43 526.035 1
 -9 -9 6 226.787 167.761 1
 -9 -9 7 372.538 222.343 1
 -9 -9 8 252.622 122.611 1
 -9 -9 9 69.2476 118.821 1
 -9 -9 10 213.08 233.223 1
 -9 -9 11 961.651 370.787 1
 -9 -9 12 349.091 304.283 1
 -9 -9 13 681.634 350.883 1
 9 10 -10 -12.9221 101.636 2
 9 10 -9 -556.956 305.933 2
 9 10 -8 -114.238 118.361 2
 9 10 -7 70.3091 128.631 2
 9 10 -6 1254.22 437.244 2
 9 10 -5 107.718 166.657 2
 -9 -10 -5 27.8999 145.267 1
 9 10 -4 211.574 202.25 2
 -9 -10 -4 570.88 274.965 1
 9 10 -3 266.018 146.862 2
 -9 -10 -3 306.853 245.67 1
 9 10 -2 1038.58 402.072 2
 -9 -10 -2 380.525 242.676 1
 9 10 -1 848.597 364.18 2
 -9 -10 -1 647.87 294.726 1
 9 10 0 259.874 140.211 2
 -9 -10 0 219.701 208.141 1
 9 10 1 541.781 307.954 2
 -9 -10 1 173.973 176.227 1
 -9 -10 2 395.682 267.905 1
 9 10 2 439.087 303.043 2
 -9 -10 3 914.335 338.614 1
 9 10 3 885.968 399.608 2
 9 10 4 640.436 310.215 2
 -9 -10 4 857.92 357.089 1
 9 10 5 97.9497 160.893 2
 -9 -10 5 123.756 127.046 1
 -9 -10 6 790.271 350.021 1
 -9 -10 7 -15.6962 132.979 1
 -9 -10 8 143.19 189.921 1
 -9 -10 9 33.7041 147.055 1
 -9 -10 10 180.945 195.716 1
 9 11 -5 119.755 170.103 2
 -9 -11 -5 201.535 141.866 1
 9 11 -4 322.17 224.932 2
 -9 -11 -4 940.644 352.278 1
 -9 -11 -3 109.961 111.728 1
 9 11 -3 297.282 252.075 2
 9 11 -2 271.215 236.446 2
 -9 -11 -2 292.589 181.168 1
 -9 -11 -1 814.243 308.196 1
 9 11 -1 913.412 403.978 2
 9 11 0 437.622 300.432 2
 -9 -11 0 102.965 174.882 1
 9 11 1 1001.62 445.842 2
 -9 -11 1 1354.58 438.051 1
 9 11 2 601.374 317.292 2
 -9 -11 2 590.761 287.941 1
 -9 -11 3 -175.692 180.211 1
 9 11 3 257.76 211.928 2
 -9 -11 4 217.548 208.702 1
 9 11 4 1023.89 455.793 2
 9 11 5 430.069 297.666 2
 -9 -11 5 -104.344 235.471 1
 10 0 -20 2619.58 593.425 2
 10 0 -19 -34.5169 121.139 2
 10 0 -18 182.961 218.742 2
 10 0 -17 738.106 280.945 2
 10 0 -16 2473.71 531.034 2
 10 0 -15 272.233 186.889 2
 10 0 -14 7618.71 863.56 2
 10 0 -13 8315.61 859.179 2
 10 0 -12 1673.12 382.469 2
 10 0 -11 2471.65 443.395 2
 10 0 -10 9445.34 845.314 2
 10 0 -9 2811.16 465.076 2
 10 0 -8 6421.52 666.776 2
 10 0 -7 1205.24 300.566 2
 10 0 -6 483.306 181.683 2
 10 0 -5 22233.7 1101.3 2
 10 0 -4 29464.9 1222.61 2
 -10 0 -3 29307.5 1303.16 1
 10 0 -3 33165 1255.26 2
 -10 0 -2 8604.5 696.183 1
 10 0 -2 8660.04 628.15 2
 10 0 -1 6329.33 520.41 2
 -10 0 -1 6484.79 608.842 1
 10 0 0 10979.3 666.154 2
 -10 0 0 10818.9 790.961 1
 10 0 1 7156.35 540.489 2
 -10 0 1 5695.18 576.812 1
 10 0 2 8993.81 591.445 2
 -10 0 2 8495.73 710.248 1
 10 0 3 31356.8 1088.56 2
 -10 0 3 31459.3 1374.7 1
 -10 0 4 34181.9 1462.83 1
 10 0 4 32893.4 1130.99 2
 -10 0 5 21859.6 1175.14 1
 10 0 5 23014.9 954.105 2
 -10 0 6 276.758 159.167 1
 -10 0 7 1167.42 295.388 1
 -10 0 8 6344.62 681.915 1
 10 -1 -20 437.157 242.511 2
 10 1 -20 636.511 320.784 2
 10 -1 -19 184.545 177.701 2
 10 1 -19 372.254 280.797 2
 10 -1 -18 228.42 141.231 2
 10 1 -18 118.479 179.571 2
 10 -1 -17 683.757 288.098 2
 10 1 -17 749.541 312.122 2
 10 -1 -16 2512.06 513.077 2
 10 1 -16 2465.93 520.036 2
 10 -1 -15 1420.16 377.764 2
 10 1 -15 1650.71 414.646 2
 10 -1 -14 1245.42 345.197 2
 10 1 -14 816.987 286.423 2
 10 -1 -13 976.774 300.315 2
 10 1 -13 609.454 254.345 2
 10 -1 -12 155.324 164.512 2
 10 1 -12 34.6065 137.294 2
 10 -1 -11 703.188 257.542 2
 10 1 -11 596.748 257.32 2
 10 -1 -10 5731.21 637.334 2
 10 1 -10 6008.81 707.204 2
 10 -1 -9 3079.73 459.238 2
 10 1 -9 3595.34 538.613 2
 10 -1 -8 2908.35 422.205 2
 10 1 -8 3918.8 534.457 2
 10 -1 -7 1441.3 286.273 2
 10 1 -7 1539.54 329.351 2
 10 -1 -6 577.222 190.866 2
 10 1 -6 912.941 244.137 2
 10 -1 -5 760.226 209.518 2
 10 1 -5 433.873 202.337 2
 -10 -1 -4 13854.2 932.45 1
 10 -1 -4 14106.5 803 2
 10 1 -4 12971.6 874.303 2
 -10 -1 -3 13992.8 922.232 1
 10 -1 -3 16707.8 832.411 2
 10 1 -3 15607.1 935.892 2
 -10 -1 -2 18284 1054.83 1
 -10 1 -2 16726.7 927.598 1
 10 -1 -2 17001.6 795.141 2
 10 1 -2 18487.5 992.559 2
 -10 1 -1 5449.78 523.964 1
 10 -1 -1 5019.53 404.606 2
 10 1 -1 5663.61 550.301 2
 -10 -1 -1 6338.91 619.067 1
 10 -1 0 5930.69 421.646 2
 10 1 0 6529.91 578.745 2
 -10 -1 0 5651.7 587.869 1
 -10 1 0 5300.69 519.829 1
 10 -1 1 5491.04 387.47 2
 10 1 1 6016.93 546.66 2
 -10 -1 1 6324.81 633.416 1
 -10 1 1 5941.37 550.434 1
 10 1 2 19698.4 985.917 2
 -10 -1 2 19585.4 1116.69 1
 -10 1 2 18132.5 984.544 1
 -10 -1 3 17469.2 1089.13 1
 -10 1 3 16117.6 929.344 1
 10 1 3 17060.7 928.208 2
 10 -1 4 11963.2 549.313 2
 -10 -1 4 14035.5 979.072 1
 -10 1 4 14057.7 890.837 1
 10 1 4 15025 866.491 2
 10 -1 5 412.666 111.621 2
 -10 -1 5 817.98 261.755 1
 -10 1 5 431.216 176.765 1
 -10 -1 6 674.038 242.394 1
 10 -1 6 674.686 138.132 2
 -10 1 6 806.26 217.601 1
 -10 -1 7 1591.69 383.604 1
 -10 1 7 1229.04 296.676 1
 -10 -1 8 2940.33 476.417 1
 -10 1 8 3705.67 507.635 1
 -10 1 9 3557.11 500.562 1
 10 -2 -20 46.8064 87.7229 2
 10 2 -20 194.356 202.977 2
 10 -2 -19 221.683 217.367 2
 10 2 -19 346.575 198.794 2
 10 -2 -18 167.096 137.235 2
 10 2 -18 -6.91423 120.206 2
 10 -2 -17 298.44 170.087 2
 10 2 -17 251.107 164.979 2
 10 -2 -16 1152.93 341.441 2
 10 2 -16 1323.95 390.09 2
 10 -2 -15 269.832 172.356 2
 10 2 -15 371.643 198.941 2
 10 -2 -14 906.166 285.153 2
 10 2 -14 931.685 307.451 2
 10 -2 -13 228.865 155.067 2
 10 2 -13 681.7 286.114 2
 10 -2 -12 1997.2 396.843 2
 10 2 -12 2223.86 489.962 2
 10 -2 -11 329.699 165.729 2
 10 2 -11 303.541 189.627 2
 10 -2 -10 1666.6 344.096 2
 10 2 -10 1325.36 343.715 2
 10 -2 -9 391.042 157.789 2
 10 2 -9 588.845 221.695 2
 10 2 -8 7425.14 773.958 2
 10 -2 -8 7926.33 675.237 2
 10 -2 -7 791.694 209.646 2
 10 2 -7 520.595 193.031 2
 10 2 -6 2861.55 469.776 2
 10 -2 -6 2863.58 374.853 2
 10 -2 -5 355.089 144.639 2
 -10 -2 -5 630.832 251.789 1
 10 2 -5 681.324 234.356 2
 10 -2 -4 374.706 126.568 2
 -10 -2 -4 235.446 98.3469 1
 10 2 -4 230.776 159.655 2
 -10 -2 -3 2602.1 422.209 1
 10 2 -3 2650.54 434.904 2
 10 -2 -3 2734.33 309.161 2
 10 2 -2 7104.41 675.198 2
 -10 -2 -2 6982.14 696.503 1
 10 -2 -2 5056.74 380.421 2
 10 2 -1 5647.13 594.306 2
 -10 -2 -1 6159.37 651.163 1
 10 -2 -1 5228.91 347.096 2
 10 2 0 113.277 103.27 2
 10 -2 0 228.803 68.0046 2
 -10 2 0 -28.1214 70.9807 1
 -10 -2 0 42.6331 107.053 1
 10 2 1 5767.04 591.222 2
 -10 -2 1 5626.35 630.269 1
 -10 2 1 5342.72 494.258 1
 -10 -2 2 8220.03 772.445 1
 10 2 2 7835.95 690.477 2
 -10 2 2 6921.73 567.859 1
 -10 -2 3 2437.2 423.352 1
 -10 2 3 2431.11 343.333 1
 10 2 3 2834.29 417.83 2
 -10 2 3 1883.27 256.125 2
 -10 2 4 275.639 121.904 1
 10 2 4 163.111 111.375 2
 -10 -2 5 134.146 144.108 1
 -10 2 5 443.754 169.228 1
 -10 -2 6 3487.17 527.529 1
 -10 2 6 2669.23 375.857 1
 -10 -2 7 758.435 267.044 1
 -10 2 7 492.238 174.112 1
 -10 -2 8 8214.03 841.956 1
 -10 2 8 7670.96 681.241 1
 -10 2 9 772.359 222.925 1
 10 -3 -20 335.52 211.143 2
 10 3 -20 267.05 250.384 2
 10 -3 -19 393.357 253.873 2
 10 3 -19 329.036 188.82 2
 10 -3 -18 372.328 217.877 2
 10 3 -18 656.717 292.713 2
 10 -3 -17 1909.42 465.617 2
 10 3 -17 1826.16 490.855 2
 10 -3 -16 387.674 192.081 2
 10 3 -16 203.707 195.693 2
 10 -3 -15 1937.61 422.964 2
 10 3 -15 2251.72 528.47 2
 10 -3 -14 1600.22 374.854 2
 10 3 -14 1556.18 432.22 2
 10 -3 -13 1393.77 354.554 2
 10 3 -13 1976.4 462.274 2
 10 -3 -12 1004.17 274.755 2
 10 3 -12 702.527 271.393 2
 10 -3 -11 418.436 196.291 2
 10 3 -11 587.812 284.101 2
 10 -3 -10 778.022 233.15 2
 10 3 -10 145.754 110.932 2
 10 -3 -9 455.075 176.825 2
 10 3 -9 284.965 148.71 2
 10 3 -8 2385.65 475.606 2
 10 -3 -8 1998.26 334.68 2
 10 -3 -7 436.065 164.084 2
 10 3 -7 546.101 220.736 2
 10 -3 -6 253.771 106.768 2
 10 3 -6 -61.2802 118.5 2
 10 -3 -5 780.376 185.907 2
 -10 -3 -5 1366.1 325.306 1
 10 3 -5 1075.63 289.063 2
 -10 -3 -4 3259.13 482.893 1
 10 3 -4 3486.45 509.496 2
 10 -3 -4 2862.01 304.963 2
 10 3 -3 3859.78 549.106 2
 10 -3 -3 2075.55 233.434 2
 -10 -3 -3 3187.52 492.393 1
 -10 -3 -2 1958.49 412.586 1
 10 3 -2 2431.48 429.909 2
 10 3 -1 1263.04 304.656 2
 -10 -3 -1 1193.55 310.354 1
 10 3 0 555.978 208.189 2
 -10 -3 0 904.101 282.215 1
 -10 -3 1 1137.3 284.221 1
 10 3 1 1706.37 357.381 2
 -10 3 1 1205.4 220.174 1
 10 3 2 2068.86 385.62 2
 -10 3 2 1431.88 229.448 1
 -10 -3 2 1632.47 361.11 1
 10 3 3 3550.87 515.036 2
 -10 -3 3 3612.08 539.17 1
 -10 3 3 3450.18 370.751 1
 10 3 4 4525.54 566.064 2
 -10 -3 4 4026.55 577.156 1
 -10 3 4 4209.17 414.514 1
 -10 3 5 1270.15 239.85 1
 -10 -3 5 1468.35 376.211 1
 -10 -3 6 47.7917 84.2323 1
 -10 3 6 102.401 65.1546 1
 -10 -3 7 778.832 295.611 1
 -10 3 7 434.715 156.499 1
 -10 -3 8 1875.18 431.758 1
 -10 3 8 1730.42 299.961 1
 -10 -3 9 409.287 167.62 1
 -10 3 9 581.992 174.938 1
 -10 3 10 287.211 156.728 1
 10 4 -19 1956.54 535.067 2
 10 4 -18 236.958 159.546 2
 10 4 -17 1281.57 413.22 2
 10 4 -16 317.893 229.952 2
 10 4 -15 530.792 299.487 2
 10 4 -14 75.8136 166.45 2
 10 4 -13 1307.61 378.285 2
 10 4 -12 132.944 198.964 2
 10 4 -11 2945.56 558.593 2
 10 4 -10 2669.93 520.517 2
 10 4 -9 2429.17 497.157 2
 10 4 -8 2568.5 502.052 2
 10 4 -7 541.753 235.996 2
 -10 -4 -6 3499.54 532.281 1
 10 4 -6 3698.76 575.272 2
 -10 -4 -5 6114.11 683.463 1
 10 4 -5 6934.72 794.813 2
 10 4 -4 1400.09 356.909 2
 -10 -4 -4 1064 294.248 1
 10 4 -3 3879.07 587.938 2
 -10 -4 -3 3917.69 558.048 1
 10 4 -2 5842.98 706.185 2
 -10 -4 -2 5815.48 675.533 1
 10 4 -1 1308.92 338.98 2
 -10 -4 -1 2895.99 505.953 1
 10 4 0 1044.69 299.763 2
 -10 -4 0 1857.08 384.895 1
 -10 -4 1 2217.19 414.502 1
 10 4 1 2805.99 477.871 2
 -10 -4 2 5386.52 687.326 1
 10 4 2 5250.33 658.449 2
 10 4 3 4207.16 592.023 2
 -10 4 3 3804.32 343.487 1
 -10 -4 3 4305.45 617.59 1
 -10 4 4 1103.34 190.808 1
 -10 -4 4 1632.28 386.015 1
 -10 -4 5 6967.46 809.919 1
 -10 4 5 5916.09 448.032 1
 -10 -4 6 4079.03 631.821 1
 -10 4 6 3646.73 363.371 1
 -10 -4 7 447.227 242.876 1
 -10 4 7 668.226 166.116 1
 -10 -4 8 2329.4 479.257 1
 -10 4 8 1816.09 273.472 1
 -10 -4 9 2168.28 489.418 1
 -10 4 9 1910.14 291.35 1
 -10 4 10 2427.16 357.469 1
 -10 4 11 2279.85 362.686 1
 10 5 -18 841.64 364.122 2
 10 5 -17 2363.87 572.37 2
 10 5 -16 141.479 150.297 2
 10 5 -15 5514.68 850.8 2
 10 5 -14 1364.82 409.664 2
 10 5 -13 517.476 285.555 2
 10 5 -12 507.275 290.15 2
 10 5 -11 1433.24 436.675 2
 10 5 -10 2483.29 539.107 2
 10 5 -9 3877.19 652.457 2
 10 5 -8 1412.32 387.621 2
 10 5 -7 -153.388 165.852 2
 -10 -5 -6 98.1492 139.422 1
 10 5 -6 131.16 154.205 2
 10 5 -5 602.349 275.985 2
 -10 -5 -5 560.327 251.956 1
 10 5 -4 1543.8 393.065 2
 -10 -5 -4 1139.58 304.462 1
 10 5 -3 6604.96 801.293 2
 -10 -5 -3 7665.81 803.741 1
 10 5 -2 3891.24 603.331 2
 -10 -5 -2 4361.95 623.053 1
 10 5 -1 698.381 272.771 2
 -10 -5 -1 1335.44 378.733 1
 10 5 0 361.788 214.238 2
 -10 -5 0 136.458 154.415 1
 -10 -5 1 382.874 155.493 1
 10 5 1 1148.73 330.567 2
 -10 -5 2 4657.72 657.74 1
 10 5 2 3635.62 588.872 2
 10 5 3 7126.56 826.101 2
 -10 -5 3 7126.06 830.066 1
 10 5 4 1581.86 390.477 2
 -10 -5 4 1683.13 408.617 1
 -10 -5 5 125.42 92.7987 1
 -10 -5 6 472.732 203.893 1
 -10 -5 7 283.331 171.294 1
 -10 -5 8 1887.02 464.602 1
 -10 -5 9 2837.24 573.633 1
 -10 -5 10 3318.97 648.256 1
 10 6 -17 228.947 250.426 2
 10 6 -16 899.436 343.321 2
 10 6 -15 1658.31 483.13 2
 10 6 -14 452.852 259.709 2
 10 6 -13 547.194 247.854 2
 10 6 -12 1578.46 450.021 2
 10 6 -11 99.506 135.033 2
 10 6 -10 745.699 333.736 2
 10 6 -9 1803.62 464.663 2
 10 6 -8 2076.62 491.422 2
 10 6 -7 531.614 255.156 2
 10 6 -6 662.282 282.679 2
 -10 -6 -6 553.966 225.938 1
 10 6 -5 648.783 296.578 2
 -10 -6 -5 537.929 236.942 1
 -10 -6 -4 3527.11 565.638 1
 10 6 -4 1866.44 461.765 2
 10 6 -3 1525.75 426.962 2
 -10 -6 -3 2278.19 459.218 1
 10 6 -2 4447.68 699.323 2
 -10 -6 -2 4108.7 619.967 1
 10 6 -1 1796.25 465.368 2
 -10 -6 -1 1294.16 375.858 1
 10 6 0 823.494 299.208 2
 -10 -6 0 502.783 227.136 1
 -10 -6 1 1895.47 437.127 1
 10 6 1 1962.19 487.944 2
 -10 -6 2 4505.34 667.651 1
 10 6 2 4029.46 657.239 2
 10 6 3 1797.57 453.712 2
 -10 -6 3 2015.32 465.104 1
 10 6 4 3196.71 597.717 2
 -10 -6 4 3578.07 612.178 1
 -10 -6 5 575.424 238.87 1
 -10 -6 6 534.63 247.383 1
 -10 -6 7 1435.13 416.829 1
 -10 -6 8 4002.64 694.664 1
 -10 -6 9 2538.84 574.104 1
 -10 -6 10 445.879 276.87 1
 -10 -6 11 1.26845 225.181 1
 10 7 -15 24.6496 114.969 2
 10 7 -14 276.495 178.418 2
 10 7 -13 862.88 351.794 2
 10 7 -12 715.558 336.323 2
 10 7 -11 28.1626 131.281 2
 10 7 -10 1204.34 406.409 2
 10 7 -9 299.541 180.684 2
 10 7 -8 1613.1 447.033 2
 10 7 -7 314.928 261.929 2
 -10 -7 -6 385.594 208.564 1
 10 7 -6 245.701 205.055 2
 -10 -7 -5 3199.93 550.467 1
 10 7 -5 3153.98 628.909 2
 10 7 -4 544.727 305.551 2
 -10 -7 -4 116.161 111.254 1
 10 7 -3 503.899 241.125 2
 -10 -7 -3 738.81 301.094 1
 10 7 -2 329.472 198.387 2
 -10 -7 -2 503.765 262.921 1
 10 7 -1 2098.53 495.648 2
 -10 -7 -1 1958.67 454.714 1
 10 7 0 1692.3 460.108 2
 -10 -7 0 859.927 306.729 1
 -10 -7 1 2788.93 557.009 1
 10 7 1 1782.61 473.151 2
 -10 -7 2 770.421 292.575 1
 10 7 2 832.872 332.236 2
 10 7 3 994.906 362.735 2
 -10 -7 3 257.898 152.547 1
 10 7 4 -116.316 160.523 2
 -10 -7 4 429.144 237.759 1
 -10 -7 5 3269.05 614.584 1
 -10 -7 6 216.944 184.464 1
 -10 -7 7 552.703 289.381 1
 -10 -7 8 2491.52 586.286 1
 -10 -7 9 142.172 138.403 1
 -10 -7 10 799.627 334.845 1
 -10 -7 11 115.082 209.273 1
 -10 -7 12 846.688 383.396 1
 10 8 -14 363.967 130.386 2
 10 8 -13 64.1389 129.158 2
 10 8 -12 1131.66 413.017 2
 10 8 -11 314.899 222.518 2
 10 8 -10 126.424 181.103 2
 10 8 -9 125.34 156.76 2
 10 8 -8 1483.3 467.455 2
 10 8 -7 -112.71 192.189 2
 10 8 -6 1007.13 395.442 2
 -10 -8 -6 829.895 285.284 1
 10 8 -5 647.914 299.66 2
 -10 -8 -5 696.569 269.076 1
 10 8 -4 2094.52 540.615 2
 -10 -8 -4 1734.05 429.074 1
 10 8 -3 182.838 220.643 2
 -10 -8 -3 -298.669 251.387 1
 10 8 -2 4307.02 762.159 2
 -10 -8 -2 4496.76 704.922 1
 10 8 -1 458.496 238.526 2
 -10 -8 -1 328.912 177.002 1
 10 8 0 23.3177 144.612 2
 -10 -8 0 -47.5574 116.1 1
 -10 -8 1 137.817 118.31 1
 10 8 1 1036.3 385.619 2
 10 8 2 3228.67 683.057 2
 -10 -8 2 3755.86 672.08 1
 10 8 3 312.617 281.923 2
 -10 -8 3 163.059 161.432 1
 10 8 4 2024.14 549.878 2
 -10 -8 4 2034.96 498.482 1
 10 8 5 1565.4 479.005 2
 -10 -8 5 1185.08 405.756 1
 -10 -8 6 454.397 291.475 1
 -10 -8 7 135.97 210.978 1
 -10 -8 8 1437.45 467.265 1
 -10 -8 9 100.974 176.854 1
 -10 -8 10 200.229 177.016 1
 -10 -8 11 644.92 296.015 1
 -10 -8 12 897.821 369.309 1
 -10 -8 13 140.702 252.163 1
 -10 -8 14 487.248 302.459 1
 10 9 -11 725.862 354.878 2
 10 9 -10 576.14 275.863 2
 10 9 -9 1100.64 420.998 2
 10 9 -8 3822.56 770.779 2
 10 9 -7 288.083 230.636 2
 10 9 -6 813.101 350.84 2
 -10 -9 -6 828.829 315.782 1
 10 9 -5 1523.26 491.589 2
 -10 -9 -5 1500.54 403.483 1
 -10 -9 -4 1975.64 463.268 1
 10 9 -4 2218.83 588.071 2
 10 9 -3 2393.87 596.178 2
 -10 -9 -3 1656.6 415.533 1
 -10 -9 -2 1396.34 409.31 1
 10 9 -2 2002.53 565.845 2
 10 9 -1 298.846 221.44 2
 -10 -9 -1 -51.0647 146.53 1
 10 9 0 1394.77 436.374 2
 -10 -9 0 1033 359.088 1
 10 9 1 760.239 316.021 2
 -10 -9 1 73.5482 139.295 1
 -10 -9 2 1712.43 477.481 1
 10 9 2 1734.59 510.121 2
 -10 -9 3 1957.38 517.643 1
 10 9 3 2424.13 621.089 2
 10 9 4 2758.29 649.299 2
 -10 -9 4 2737.37 605.367 1
 10 9 5 2128.93 584.36 2
 -10 -9 5 2001.99 535.169 1
 -10 -9 6 872.605 401.818 1
 -10 -9 7 192.959 234.583 1
 -10 -9 8 3218.19 695.628 1
 -10 -9 9 1457.8 477.11 1
 -10 -9 10 1021.59 483.573 1
 -10 -9 11 481.223 251.785 1
 10 10 -8 1103.63 454.397 2
 10 10 -7 231.391 191.318 2
 10 10 -6 166.221 195.485 2
 10 10 -5 733.577 358.672 2
 -10 -10 -5 1531.84 429.393 1
 10 10 -4 1209.82 490.262 2
 -10 -10 -4 1156.49 338.709 1
 10 10 -3 3664.64 772.602 2
 -10 -10 -3 2986.04 614.319 1
 10 10 -2 3282.04 723.919 2
 -10 -10 -2 2544.91 583.837 1
 -10 -10 -1 663.815 272.367 1
 10 10 -1 490.619 315.117 2
 10 10 0 207.999 235.592 2
 -10 -10 0 483.871 270.349 1
 10 10 1 518.292 291.75 2
 -10 -10 1 230.769 153.12 1
 10 10 2 1832.28 563.258 2
 -10 -10 2 2124.16 524.685 1
 -10 -10 3 3164.56 662.114 1
 10 10 3 3444.82 791.041 2
 -10 -10 4 1073.14 380.976 1
 10 10 4 1193.65 477.549 2
 10 10 5 1055.99 433.097 2
 -10 -10 5 999.819 407.149 1
 10 10 6 17.3459 176.279 2
 -10 -10 6 625.732 354.446 1
 -10 -10 7 221.14 243.328 1
 -10 -10 8 681.976 338.764 1
 11 0 -19 -0.59618 145.294 2
 11 0 -18 64.8407 163.734 2
 11 0 -17 -29.6783 92.6479 2
 11 0 -16 -18.4339 128.367 2
 11 0 -15 -68.6627 192.989 2
 11 0 -14 236.358 182.177 2
 11 0 -13 -186.296 143.441 2
 11 0 -12 186.65 154.052 2
 11 0 -11 -3.50055 94.6956 2
 11 0 -10 40.2069 77.4305 2
 11 0 -9 -74.4539 68.2667 2
 11 0 -8 137.598 124.773 2
 11 0 -7 283.562 157.298 2
 11 0 -6 173.269 123.276 2
 11 0 -5 115.976 121.212 2
 11 0 -4 169.793 115.835 2
 -11 0 -3 -134.469 77.3148 1
 11 0 -3 77.2855 107.298 2
 -11 0 -2 64.5178 106.727 1
 11 0 -2 88.8497 133.575 2
 -11 0 -1 -139.705 135.131 1
 11 0 -1 131.214 88.7568 2
 -11 0 0 45.8389 101.464 1
 11 0 0 10.1867 52.8914 2
 -11 0 1 -67.4255 105.185 1
 11 0 1 120.672 100.814 2
 11 0 2 -9.60906 98.3274 2
 -11 0 2 -89.1987 108.001 1
 11 0 3 14.1623 104.402 2
 -11 0 3 -133.135 73.319 1
 11 0 4 66.3079 55.6053 2
 -11 0 4 -71.9375 99.3089 1
 11 0 5 11.1725 39.4979 2
 -11 0 5 -66.4269 99.0759 1
 11 0 6 395.351 163.402 2
 -11 0 6 30.8433 80.7379 1
 -11 0 7 -34.95 119.815 1
 -11 0 8 -175.578 114.638 1
 -11 0 9 -21.6368 81.0118 1
 -11 0 10 -130.621 152.419 1
 11 -1 -19 367.715 236.09 2
 11 1 -19 41.7414 191.033 2
 11 -1 -18 1438.82 405.142 2
 11 1 -18 1322.45 397.75 2
 11 -1 -17 344.485 209.837 2
 11 1 -17 398.978 249.222 2
 11 -1 -16 91.3409 144.664 2
 11 1 -16 253.326 171.341 2
 11 -1 -15 207.057 173.943 2
 11 1 -15 135.871 130.047 2
 11 -1 -14 1277.24 362.253 2
 11 1 -14 974.538 346.091 2
 11 -1 -13 334.851 193.369 2
 11 1 -13 291.185 184.152 2
 11 1 -12 5509.03 725.434 2
 11 -1 -12 5220.79 677.68 2
 11 -1 -11 20.4191 72.6652 2
 11 1 -11 251.969 180.71 2
 11 -1 -10 246.553 116.511 2
 11 1 -10 370.318 197.264 2
 11 -1 -9 661.806 218.642 2
 11 1 -9 459.592 210.393 2
 11 -1 -8 1023.97 278.744 2
 11 1 -8 1034.72 285.207 2
 11 -1 -7 611.895 200.101 2
 11 1 -7 987.743 271.376 2
 11 -1 -6 4903.31 526.976 2
 11 1 -6 5759.21 635.439 2
 11 -1 -5 527.411 179.801 2
 11 1 -5 752.267 228.733 2
 11 -1 -4 6407.01 558.749 2
 -11 -1 -4 7514.43 722.619 1
 11 1 -4 6076.1 631.121 2
 11 -1 -3 38.8681 93.5636 2
 -11 -1 -3 217.479 101.933 1
 11 1 -3 -14.0815 75.0112 2
 11 -1 -2 1249.51 241.472 2
 -11 1 -2 1705.73 321.961 1
 -11 -1 -2 1602.18 325.548 1
 11 1 -2 1584.95 333.652 2
 -11 -1 -1 752.883 242.19 1
 11 -1 -1 366.932 123.62 2
 -11 1 -1 418.972 158.69 1
 11 1 -1 561.153 193.865 2
 -11 1 0 18319.2 1028.88 1
 11 1 0 18422.1 1020.38 2
 -11 -1 0 18469.8 1132.29 1
 -11 1 1 410.39 172.663 1
 11 1 1 757.68 229.358 2
 -11 -1 1 169.501 179.623 1
 11 -1 1 335.612 103.348 2
 -11 -1 2 1472.38 347.903 1
 -11 1 2 1866.48 326.59 1
 11 1 2 2002.06 334.438 2
 11 -1 2 1002.29 169.343 2
 -11 -1 3 13.361 131.474 1
 11 1 3 -48.5066 71.3718 2
 -11 1 3 20.0568 77.3737 1
 11 -1 3 -75.2119 62.7979 2
 -11 -1 4 7649.65 772.527 1
 -11 1 4 6454.59 623.24 1
 11 1 4 7263.71 640.919 2
 11 1 5 483.956 160.438 2
 -11 -1 5 354.521 192.602 1
 -11 1 5 783.834 224.185 1
 11 1 6 7046.24 618.164 2
 -11 -1 6 7043.14 751.482 1
 -11 1 6 5928.95 625.269 1
 -11 -1 7 880.165 273.611 1
 -11 1 7 919.892 258.618 1
 -11 -1 8 675.015 248.028 1
 -11 1 8 1361.06 325.662 1
 -11 -1 9 570.972 235.846 1
 -11 1 9 603.008 243.503 1
 -11 -1 10 174.666 102.474 1
 -11 1 10 222.811 150.667 1
 11 -2 -19 -24.9089 107.303 2
 11 2 -19 407.788 188.413 2
 11 -2 -18 1415.93 410.229 2
 11 2 -18 1218.77 426.353 2
 11 -2 -17 718.678 279.051 2
 11 2 -17 1009.38 355.635 2
 11 -2 -16 2123.15 459.798 2
 11 2 -16 1121.26 385.18 2
 11 -2 -15 295.974 148.906 2
 11 2 -15 171.332 98.2994 2
 11 -2 -14 1348.43 334.469 2
 11 2 -14 1405.37 401.104 2
 11 -2 -13 211.005 139.175 2
 11 2 -13 231.648 151.796 2
 11 -2 -12 740.136 247.588 2
 11 2 -12 752.694 277.728 2
 11 -2 -11 63.1515 51.7554 2
 11 2 -11 5.113 112.594 2
 11 -2 -10 33.4514 60.9871 2
 11 2 -10 234.921 151.117 2
 11 -2 -9 553.095 206.662 2
 11 2 -9 620.204 250.394 2
 11 2 -8 10547.1 944.836 2
 11 -2 -8 9601.27 760.12 2
 11 2 -7 2427.13 447.214 2
 11 -2 -7 1763.16 320.514 2
 11 2 -6 7987.38 790.893 2
 11 -2 -6 4764.52 496.722 2
 11 -2 -5 650.103 187.28 2
 11 2 -5 703.383 254.614 2
 -11 -2 -4 1227.13 294.671 1
 11 -2 -4 1160.46 221.168 2
 11 2 -4 1868.82 376.744 2
 11 2 -3 3383.19 492.133 2
 11 -2 -3 2752.85 312.455 2
 11 2 -2 12495.2 934.057 2
 -11 -2 -2 13922 1008.41 1
 11 2 -1 2527.94 427.448 2
 -11 -2 -1 1986.28 404.447 1
 -11 2 0 19825.6 998.043 1
 11 2 0 20444.4 1169.73 2
 -11 -2 0 22544.5 1302.42 1
 11 2 1 2211.79 390.474 2
 -11 -2 1 948.248 275.708 1
 -11 2 1 1784.51 300.677 1
 11 2 2 13169.8 927.965 2
 -11 -2 2 12487.3 988.038 1
 -11 2 2 12419.5 799.304 1
 -11 -2 3 5409.85 664.566 1
 11 2 3 4405.3 544.41 2
 -11 2 3 4161.52 473.023 1
 -11 2 4 1591.48 294.58 1
 11 2 4 1895.09 357.089 2
 -11 -2 4 1746.15 394.346 1
 -11 2 5 980.331 236.311 1
 11 2 5 1101.36 268.691 2
 -11 -2 5 913.253 285.096 1
 -11 -2 6 8622.35 883.422 1
 -11 2 6 7820.28 686.518 1
 -11 -2 7 2586.86 497.802 1
 -11 2 7 2442.96 395.162 1
 -11 -2 8 11836.2 1068.37 1
 -11 2 8 10359.7 821.72 1
 -11 -2 9 678.259 270.063 1
 -11 2 9 350.764 145.076 1
 -11 -2 10 189.342 186.352 1
 -11 2 10 41.4644 66.8493 1
 -11 2 11 63.3279 112.458 1
 11 3 -18 4895.03 817.852 2
 11 -3 -18 4619.28 720.761 2
 11 -3 -17 211.233 185.791 2
 11 3 -17 135.149 200.765 2
 11 -3 -16 1719.97 420.469 2
 11 3 -16 1070.91 370.836 2
 11 -3 -15 218.803 153.836 2
 11 3 -15 -87.2329 139.49 2
 11 3 -14 4238.95 721.227 2
 11 -3 -14 3242.55 538.789 2
 11 -3 -13 179.796 162.457 2
 11 3 -13 781.171 305.803 2
 11 3 -12 7549.09 916.661 2
 11 -3 -12 4532.98 589.851 2
 11 -3 -11 778.01 248.827 2
 11 3 -11 1936.49 448.677 2
 11 -3 -10 1048.02 262.887 2
 11 3 -10 1714.03 404.587 2
 11 -3 -9 708.32 214.61 2
 11 3 -9 843.19 300.046 2
 11 3 -8 4918.92 674.003 2
 11 -3 -8 3244.26 429.212 2
 11 -3 -7 786.946 199.734 2
 11 3 -7 2201.55 455.061 2
 11 3 -6 9895.61 925.994 2
 11 -3 -6 5956.36 517.879 2
 11 -3 -5 170.605 88.9108 2
 -11 -3 -5 930.358 299.903 1
 11 3 -5 788.761 264.147 2
 -11 -3 -4 3078.37 483.147 1
 11 3 -4 3337.1 550.173 2
 -11 -3 -3 2253.02 423.637 1
 11 3 -3 1679.32 375.909 2
 11 3 -2 4305.92 593.874 2
 -11 -3 -2 4752.42 617.552 1
 11 3 -1 876.126 269.069 2
 -11 -3 -1 1112.58 293.01 1
 11 3 0 5770.37 672.496 2
 -11 -3 0 5290.03 657.07 1
 11 3 1 1139.58 299.163 2
 -11 -3 1 899.438 282.13 1
 -11 3 1 865.613 210.085 1
 -11 3 2 4004.34 416.363 1
 -11 -3 2 4711.21 629.593 1
 11 3 2 4686.45 601.394 2
 11 3 3 2228.25 426.979 2
 -11 -3 3 1387.19 346.382 1
 -11 3 3 1835.22 286.989 1
 -11 -3 4 3678.59 583.632 1
 -11 3 4 2885.58 373.701 1
 11 3 4 3447.79 530.453 2
 -11 3 5 389.103 135.65 1
 11 3 5 585.49 231.345 2
 -11 -3 5 261.974 144.721 1
 -11 -3 6 10877.3 1031.16 1
 -11 3 6 10554.3 723.475 1
 -11 -3 7 1950.19 449.238 1
 -11 3 7 1011.73 228.122 1
 -11 -3 8 4398.23 686.193 1
 -11 3 8 4954.37 528.396 1
 -11 -3 9 1108.73 338.983 1
 -11 3 9 656.698 206.038 1
 -11 -3 10 1228.22 382.687 1
 -11 3 10 1552.79 309.133 1
 -11 3 11 1270.17 296.566 1
 -11 3 12 6892.95 707.161 1
 11 4 -18 3458.32 716.649 2
 11 4 -17 411.444 272.599 2
 11 4 -16 663.019 286.282 2
 11 4 -15 551.905 302.337 2
 11 4 -14 581.69 299.196 2
 11 4 -13 2293.94 530.912 2
 11 4 -12 3363.6 626.685 2
 11 4 -11 543.427 284.748 2
 11 4 -10 567.627 263.429 2
 11 4 -9 172.727 152.269 2
 11 4 -8 1669.14 438.405 2
 11 4 -7 589.664 273.861 2
 11 4 -6 4803.56 688.609 2
 -11 -4 -5 1392.85 339.486 1
 11 4 -5 1499.22 368.098 2
 11 4 -4 1509 393.063 2
 -11 -4 -4 1544.11 363.57 1
 11 4 -3 654.631 281.646 2
 -11 -4 -3 500.531 209.815 1
 -11 -4 -2 196.411 137.642 1
 11 4 -2 387.806 223.226 2
 11 4 -1 436.102 242.645 2
 -11 -4 -1 309.852 181.077 1
 11 4 0 1541.71 377.546 2
 -11 -4 0 1664.25 406.924 1
 -11 -4 1 74.7993 169.465 1
 11 4 1 281.841 187.287 2
 -11 -4 2 385.482 154.443 1
 11 4 2 301.115 263.37 2
 -11 4 3 358.961 129.891 1
 -11 -4 3 243.798 177.283 1
 11 4 4 1325.3 378.577 2
 -11 -4 4 949.114 315.806 1
 -11 4 4 1237.58 221.499 1
 -11 4 5 1115 203.925 1
 11 4 5 1702.73 397.499 2
 -11 -4 5 1570.15 404.257 1
 -11 -4 6 4437.17 666.676 1
 -11 4 6 3694.18 386.422 1
 -11 -4 7 265.863 186.063 1
 -11 -4 8 2745.61 561.128 1
 -11 -4 9 587.814 260.475 1
 -11 -4 10 814.58 323.2 1
 -11 -4 11 256.37 189.047 1
 11 5 -17 140.961 190.268 2
 11 5 -16 125.36 118.414 2
 11 5 -15 -428.772 255.533 2
 11 5 -14 416.665 248.133 2
 11 5 -13 730.599 299.445 2
 11 5 -12 -178.616 191.286 2
 11 5 -11 206.292 166.395 2
 11 5 -10 207.394 140.239 2
 11 5 -9 289.012 215.75 2
 11 5 -8 654.381 287.392 2
 11 5 -7 457.023 211.543 2
 -11 -5 -6 495.105 233.368 1
 11 5 -6 419.826 205.392 2
 -11 -5 -5 476.994 225.68 1
 11 5 -5 342.722 208.735 2
 -11 -5 -4 2888.97 512.808 1
 11 5 -4 3520.43 620.529 2
 11 5 -3 845.77 291.401 2
 -11 -5 -3 597.59 205.557 1
 -11 -5 -2 766.109 287.098 1
 11 5 -2 838.847 306.245 2
 11 5 -1 148.206 161.248 2
 -11 -5 -1 -55.7891 97.4159 1
 11 5 0 8.52564 77.4811 2
 -11 -5 0 0.44816 118.975 1
 -11 -5 1 217.931 202.463 1
 11 5 1 584.819 259.701 2
 -11 -5 2 842.301 305.226 1
 11 5 2 1029.75 333.2 2
 11 5 3 626.608 262.465 2
 -11 -5 3 616.693 245.836 1
 11 5 4 2992.63 563.114 2
 -11 -5 4 3463.06 606.104 1
 11 5 5 200.3 175.611 2
 -11 -5 5 161.946 96.2817 1
 -11 -5 6 965.159 345.258 1
 -11 -5 7 -49.3988 189.611 1
 -11 -5 8 637.498 269.506 1
 -11 -5 9 -77.1507 166.89 1
 -11 -5 10 528.11 268.171 1
 -11 -5 11 175.887 107.728 1
 -11 -5 12 301.504 197.327 1
 11 6 -16 215.341 181.323 2
 11 6 -15 -74.5051 93.7616 2
 11 6 -14 428.156 217.516 2
 11 6 -13 496.865 259.358 2
 11 6 -12 560.242 290.475 2
 11 6 -11 951.701 370.378 2
 11 6 -10 518.608 271.317 2
 11 6 -9 -112.596 212.693 2
 11 6 -8 365.419 231.986 2
 11 6 -7 577.405 259.673 2
 -11 -6 -6 1680.45 425.54 1
 11 6 -6 1725.32 481.781 2
 11 6 -5 191.34 86.3807 2
 -11 -6 -5 173.935 198.302 1
 11 6 -4 2188.01 510.926 2
 -11 -6 -4 3069.91 533.3 1
 11 6 -3 2593.75 544.749 2
 -11 -6 -3 2367.69 473.541 1
 -11 -6 -2 2761.98 531.118 1
 11 6 -2 3312.74 627.082 2
 11 6 -1 1210.98 372.224 2
 -11 -6 -1 1091.32 351.936 1
 11 6 0 5606.78 806.287 2
 -11 -6 0 5848.34 787.309 1
 -11 -6 1 415.765 249.325 1
 11 6 1 1753.03 496.369 2
 -11 -6 2 3088.9 570.699 1
 11 6 2 3203.8 619.686 2
 11 6 3 2822.12 561.002 2
 -11 -6 3 2442.09 521.528 1
 11 6 4 2505.78 589.345 2
 -11 -6 4 1943.54 477.667 1
 11 6 5 -30.215 120.557 2
 -11 -6 5 -72.0441 104.314 1
 -11 -6 6 2361.16 525.147 1
 -11 -6 7 1743.18 473.39 1
 -11 -6 8 1185.88 420.564 1
 -11 -6 9 423.549 268.178 1
 -11 -6 10 856.526 338.773 1
 -11 -6 11 1328.74 456.194 1
 -11 -6 12 214.277 235.901 1
 -11 -6 13 626.261 291.25 1
 11 7 -14 -2.88874 105.996 2
 11 7 -13 717.663 323.86 2
 11 7 -12 4504.9 802.145 2
 11 7 -11 312.378 184.274 2
 11 7 -10 2978.76 639.425 2
 11 7 -9 116.087 172.536 2
 11 7 -8 467.066 296.669 2
 11 7 -7 110.81 222.572 2
 -11 -7 -6 9915.31 1029.42 1
 11 7 -6 9198.89 1111.32 2
 11 7 -5 4099.39 739.507 2
 -11 -7 -5 3462.11 593.777 1
 11 7 -4 1063.15 402.774 2
 -11 -7 -4 1313.88 357.587 1
 11 7 -3 624.168 331.686 2
 -11 -7 -3 444.085 210.98 1
 -11 -7 -2 765.081 313.721 1
 11 7 -2 866.422 338.395 2
 11 7 -1 450.859 268.876 2
 -11 -7 -1 1157.5 377.085 1
 11 7 0 4543.02 776.32 2
 -11 -7 0 4392.42 710.611 1
 11 7 1 238.995 233.031 2
 -11 -7 1 444.027 287.932 1
 -11 -7 2 718.125 321.047 1
 11 7 2 1128.01 380.323 2
 -11 -7 3 983.067 369.992 1
 11 7 3 782.74 291.78 2
 11 7 4 1895.91 510.115 2
 -11 -7 4 723.831 322.475 1
 11 7 5 3552.59 692.922 2
 -11 -7 5 2058.82 528.996 1
 -11 -7 6 11023.4 1191.6 1
 -11 -7 7 -61.0247 216.148 1
 -11 -7 8 654.682 324.952 1
 -11 -7 9 84.6882 133.346 1
 -11 -7 10 1444.85 492.618 1
 -11 -7 11 1116.3 438.871 1
 -11 -7 12 5771.06 974.779 1
 -11 -7 13 281.57 240.693 1
 -11 -7 14 178.478 241.337 1
 11 8 -12 2977.08 696.985 2
 11 8 -11 917.282 378.539 2
 11 8 -10 2012.3 574.01 2
 11 8 -9 818.193 357.047 2
 11 8 -8 489.412 245.369 2
 11 8 -7 66.7037 103.008 2
 11 8 -6 2435.53 614.935 2
 -11 -8 -6 2234.86 492.664 1
 11 8 -5 2686.2 622.426 2
 -11 -8 -5 3015.78 600.106 1
 -11 -8 -4 1264.28 404.207 1
 11 8 -4 1020.09 387.969 2
 11 8 -3 649.906 317.787 2
 -11 -8 -3 256.145 211.357 1
 -11 -8 -2 807.776 284.967 1
 11 8 -2 1197.67 402.161 2
 11 8 -1 445.171 267.993 2
 -11 -8 -1 15.1588 149.561 1
 11 8 0 511.206 272.821 2
 -11 -8 0 184.503 134.648 1
 11 8 1 849.143 352.827 2
 -11 -8 1 498.17 267.309 1
 -11 -8 2 1890.16 474.204 1
 11 8 2 1412.85 446.918 2
 -11 -8 3 127.606 175.72 1
 11 8 3 413.601 180.233 2
 11 8 4 1472.08 475.372 2
 -11 -8 4 819.241 331.362 1
 11 8 5 1966.26 544.927 2
 -11 -8 5 2786.52 639.965 1
 11 8 6 2133.1 606.076 2
 -11 -8 6 1802.61 478.422 1
 -11 -8 7 16.1302 125.591 1
 -11 -8 8 837.328 405.125 1
 -11 -8 9 733.543 358.348 1
 -11 -8 10 2200.13 586.082 1
 -11 -8 11 791.516 370.778 1
 -11 -8 12 2235 636.685 1
 11 9 -9 -116.145 172.758 2
 11 9 -8 1531.68 480.403 2
 11 9 -7 -31.2822 146.207 2
 11 9 -6 85.1912 161.286 2
 -11 -9 -6 580.247 301.715 1
 11 9 -5 958.942 411.095 2
 -11 -9 -5 631.419 289.154 1
 11 9 -4 1184.73 420.702 2
 -11 -9 -4 1196.04 385.745 1
 11 9 -3 773.632 388.46 2
 -11 -9 -3 867.029 340.569 1
 11 9 -2 429.154 250.315 2
 -11 -9 -2 -83.5433 158.428 1
 11 9 -1 210.288 171.711 2
 -11 -9 -1 633.932 280.535 1
 11 9 0 149.197 195.073 2
 -11 -9 0 -183.377 175.961 1
 11 9 1 494.897 331 2
 -11 -9 1 129.06 152.553 1
 11 9 2 340.925 297.112 2
 -11 -9 2 329.217 294.599 1
 -11 -9 3 349.609 236.673 1
 11 9 3 408.334 233.539 2
 -11 -9 4 990.374 355.218 1
 11 9 4 2072.19 590.714 2
 11 9 5 880.949 391.058 2
 -11 -9 5 543.941 303.304 1
 11 9 6 365.153 195.031 2
 -11 -9 6 -79.0873 173.638 1
 11 9 7 208.718 236.546 2
 -11 -9 7 -18.3908 153.416 1
 -11 -9 8 2082.82 547.917 1
 -11 -9 9 256.535 113.451 1
 11 10 -4 784.911 363.195 2
 -11 -10 -4 296.185 249.3 1
 11 10 -3 380.139 315.171 2
 -11 -10 -3 209.025 165.637 1
 11 10 -2 1560.03 542.583 2
 -11 -10 -2 1684.58 476.001 1
 -11 -10 -1 49.8414 95.3381 1
 11 10 -1 526.55 327.696 2
 11 10 0 -550.951 323.651 2
 -11 -10 0 227.786 206.15 1
 11 10 1 -13.4426 130.045 2
 -11 -10 1 238.506 144.773 1
 11 10 2 2591.75 701.35 2
 -11 -10 2 2055.03 539.229 1
 -11 -10 3 378.204 266.294 1
 11 10 3 -13.8057 165.394 2
 -11 -10 4 1018.91 398.444 1
 11 10 4 254.631 275.236 2
 12 0 -18 82.6189 189.199 2
 12 0 -17 1659.75 453.689 2
 12 0 -16 1283.14 407.339 2
 12 0 -15 187.386 164.61 2
 12 0 -14 4723.5 713.467 2
 12 0 -13 177.223 115.283 2
 12 0 -12 954.985 316.648 2
 12 0 -11 2303.33 451.4 2
 12 0 -10 6120.46 711.686 2
 12 0 -9 2291.91 430.852 2
 12 0 -8 5645.38 655.86 2
 12 0 -7 523.303 209.012 2
 12 0 -6 5004.16 605.98 2
 12 0 -5 12751 906.63 2
 12 0 -4 12814 874.702 2
 12 0 -3 3375.95 441.376 2
 -12 0 -2 29437.2 1423.01 1
 12 0 -2 18979.5 998.6 2
 -12 0 -1 2897.6 442.254 1
 12 0 -1 1577.26 282.506 2
 -12 0 0 315.277 157.189 1
 12 0 0 708.303 186.645 2
 12 0 1 1454.84 259.839 2
 -12 0 1 2713.67 433.863 1
 12 0 2 17801.6 903.918 2
 -12 0 2 30509.7 1483.85 1
 -12 0 3 5400.27 640.628 1
 -12 0 4 16078.1 1097.14 1
 -12 0 5 15435.7 1106.72 1
 -12 0 6 5861.57 687.845 1
 -12 0 7 595.497 232.728 1
 -12 0 8 6597.02 776.085 1
 -12 0 9 2612.21 490.047 1
 -12 0 10 8158.96 894.003 1
 -12 0 11 1771.55 408.589 1
 -12 0 12 1642.15 411.819 1
 12 -1 -18 -39.3308 127.453 2
 12 1 -18 -325.428 219.462 2
 12 -1 -17 173.712 82.2836 2
 12 1 -17 325.293 191.51 2
 12 1 -16 3384.66 638.702 2
 12 -1 -16 3136.66 587.253 2
 12 -1 -15 960.145 342.526 2
 12 1 -15 930.022 334.617 2
 12 1 -14 3422.03 610.048 2
 12 -1 -14 3852.71 620.706 2
 12 -1 -13 268.891 182.537 2
 12 1 -13 325.324 176.89 2
 12 -1 -12 1783.17 411.54 2
 12 1 -12 2350.83 488.559 2
 12 -1 -11 -3.63908 55.1706 2
 12 1 -11 -12.1802 99.8185 2
 12 -1 -10 661.782 259.97 2
 12 1 -10 1008.38 350.106 2
 12 -1 -9 720.926 234.03 2
 12 1 -9 726.889 262.58 2
 12 -1 -8 2415.94 409.767 2
 12 1 -8 4104.42 584.661 2
 12 -1 -7 224.542 124.05 2
 12 1 -7 286.104 194.141 2
 12 -1 -6 171.05 124.184 2
 12 1 -6 202.793 145.917 2
 12 -1 -5 290.137 133.434 2
 12 1 -5 720.538 235.886 2
 12 -1 -4 6099.7 556.336 2
 12 1 -4 10879 861.807 2
 -12 -1 -3 2893.04 469.478 1
 12 -1 -3 1696.69 283.007 2
 12 1 -3 2465.42 409.791 2
 -12 -1 -2 9884.48 855.082 1
 12 1 -2 10218.9 810.791 2
 -12 1 -1 2175.22 370.119 1
 -12 -1 -1 1810.73 360.826 1
 12 1 -1 2107.55 362.921 2
 -12 -1 0 2498.46 446.981 1
 12 1 0 2156.93 363.602 2
 -12 1 0 1593.39 312.906 1
 12 1 1 1721.78 322.418 2
 -12 1 1 1768.43 343.34 1
 -12 -1 1 1932.35 386.67 1
 -12 -1 2 10250.6 922.654 1
 -12 1 2 11699.8 877.99 1
 -12 -1 3 2659.26 469.408 1
 12 1 3 1746.14 326.027 2
 -12 1 3 2588.71 421.676 1
 -12 -1 4 11469.6 971.411 1
 -12 1 4 9648.62 806.826 1
 -12 1 5 720.603 245.955 1
 12 1 5 337.535 145.147 2
 -12 -1 5 661.464 248.054 1
 12 1 6 111.758 45.7596 2
 -12 -1 6 106.376 95.3682 1
 -12 1 6 335.415 177.269 1
 12 1 7 -29.7024 57.9228 2
 -12 -1 7 647.554 287.118 1
 -12 1 7 534.441 237.828 1
 -12 -1 8 4167.93 631.507 1
 -12 1 8 4544.15 587.965 1
 -12 -1 9 1320.52 343.23 1
 -12 1 9 1175.39 319.442 1
 -12 -1 10 1022.57 341.184 1
 -12 1 10 976.007 273.622 1
 -12 -1 11 118.407 151.953 1
 -12 1 11 95.4428 140.496 1
 -12 -1 12 3070.32 582.257 1
 -12 1 12 2822.93 523.084 1
 -12 1 13 411.216 201.122 1
 12 -2 -18 120.997 131.476 2
 12 2 -18 173.625 172.008 2
 12 -2 -17 -131.392 122.62 2
 12 2 -17 -105.315 112.324 2
 12 -2 -16 660.287 257.915 2
 12 2 -16 792.076 313.465 2
 12 -2 -15 257.482 160.868 2
 12 2 -15 525.701 262.021 2
 12 -2 -14 135.417 131.878 2
 12 2 -14 139.556 179.13 2
 12 -2 -13 231.105 174.932 2
 12 2 -13 117.769 153.317 2
 12 -2 -12 -40.5329 58.817 2
 12 2 -12 -37.2419 76.8295 2
 12 -2 -11 226.375 174.634 2
 12 2 -11 183.93 196.437 2
 12 -2 -10 267.858 136.858 2
 12 2 -10 379.889 216.934 2
 12 -2 -9 107.376 106.679 2
 12 2 -9 133.959 133.754 2
 12 -2 -8 1413.2 297.741 2
 12 2 -8 2320.18 459.554 2
 12 -2 -7 510.916 174.961 2
 12 2 -7 825.046 285.084 2
 12 2 -6 2819.18 502.757 2
 12 2 -5 1413.17 340.237 2
 -12 -2 -4 1915.63 415.253 1
 12 2 -4 1481.72 349.887 2
 -12 -2 -3 1128.39 301.736 1
 12 2 -3 974.989 282.036 2
 -12 -2 -2 1611.13 377.849 1
 12 2 -2 1277.98 335.719 2
 -12 -2 -1 -61.5949 123.128 1
 12 2 -1 264.099 164.065 2
 12 2 0 748.518 249.649 2
 -12 2 0 840.25 217.342 1
 -12 -2 0 1065.62 298.137 1
 12 2 1 203.708 147.888 2
 -12 2 1 136.511 89.7297 1
 -12 -2 1 39.6087 89.6775 1
 12 2 2 1284.12 301.378 2
 -12 -2 2 1474.84 369.248 1
 -12 2 2 1308.12 289.052 1
 -12 -2 3 1100.98 320.912 1
 12 2 3 860.075 255.825 2
 -12 2 3 1192.47 273.154 1
 12 2 4 1458.98 315.569 2
 -12 2 4 1735 326.533 1
 -12 -2 4 2363.62 470.88 1
 -12 2 5 1479.41 296.984 1
 12 2 5 1371.98 312.941 2
 -12 -2 5 1805.51 414.72 1
 12 2 6 2444.97 426.264 2
 -12 -2 6 2891.87 524.177 1
 -12 2 6 3297.09 464.623 1
 -12 -2 7 914.443 330.571 1
 -12 2 7 965.833 250.916 1
 -12 -2 8 2482 521.052 1
 -12 2 8 2342.32 410.192 1
 -12 -2 9 466.256 247.747 1
 -12 2 9 272.462 189.894 1
 -12 -2 10 815.913 318.731 1
 -12 2 10 614.682 230.274 1
 -12 -2 11 308.603 171.411 1
 -12 2 11 -7.93949 68.9995 1
 -12 -2 12 -71.8175 129.76 1
 -12 2 12 156.355 158.95 1
 -12 2 13 223.115 166.782 1
 12 -3 -17 191.696 153.813 2
 12 3 -17 305.099 265.914 2
 12 -3 -16 1251.07 351.568 2
 12 3 -16 1525.94 459.913 2
 12 -3 -15 169.574 154.098 2
 12 3 -15 561.179 258.528 2
 12 -3 -14 246.676 190.647 2
 12 3 -14 505.428 246.35 2
 12 -3 -13 383.567 204.86 2
 12 3 -13 506.251 273.242 2
 12 3 -12 400.264 192.716 2
 12 3 -11 -83.8543 117.215 2
 12 3 -10 257.507 190.934 2
 12 3 -9 463.608 223.968 2
 12 3 -8 809.156 270.108 2
 12 3 -7 1094.95 335.119 2
 12 3 -6 1548.66 379.842 2
 12 3 -5 313.935 185.162 2
 -12 -3 -5 961.79 315.108 1
 -12 -3 -4 1203.43 346.09 1
 12 3 -4 1300.41 323.587 2
 12 3 -3 407.791 220.089 2
 -12 -3 -3 129.296 92.9238 1
 12 3 -2 1107.17 319.752 2
 -12 -3 -2 1158.96 327.773 1
 -12 -3 -1 1125.47 313.002 1
 12 3 -1 825.636 281.636 2
 12 3 0 3265.91 530.942 2
 -12 -3 0 2433.64 455.193 1
 12 3 1 1227.17 327.379 2
 -12 -3 1 1157.28 328.671 1
 12 3 2 1083.03 313.827 2
 -12 3 2 1004.2 227.553 1
 -12 -3 3 373.016 208.509 1
 12 3 3 322.946 199.2 2
 -12 3 3 346.516 136.41 1
 -12 3 4 1495.75 273.339 1
 12 3 4 1227.33 321.772 2
 -12 -3 4 1777.84 412.644 1
 12 3 5 941.143 292.683 2
 -12 3 5 886.633 216.262 1
 -12 -3 5 616.611 286.198 1
 -12 3 6 1179.07 258.035 1
 12 3 6 975.512 273.277 2
 -12 -3 6 1325.49 400.782 1
 -12 3 7 907.683 242.104 1
 -12 -3 7 1094.84 379.052 1
 -12 -3 8 1090.98 388.598 1
 -12 3 8 788.472 222.611 1
 -12 -3 9 -151.371 205.106 1
 -12 3 9 124.328 101.378 1
 -12 -3 10 636.726 284.761 1
 -12 3 10 270.333 158.666 1
 -12 -3 11 -37.9199 137.074 1
 -12 -3 12 397.023 225.043 1
 -12 -3 13 465.119 284.568 1
 12 4 -16 1221.51 415.65 2
 12 4 -15 254.461 196.916 2
 12 4 -14 2869.78 624.993 2
 12 4 -13 4178.63 736.227 2
 12 4 -12 445.534 242.051 2
 12 4 -11 1978.53 492.085 2
 12 4 -10 1285.49 391.33 2
 12 4 -9 3677.24 641.676 2
 12 4 -8 1732.11 447.478 2
 12 4 -7 1629.57 431.633 2
 12 4 -6 1774.35 434.829 2
 -12 -4 -5 1997.49 418.995 1
 12 4 -5 2050.45 456.724 2
 -12 -4 -4 4014.53 614.787 1
 12 4 -4 3623.93 598.374 2
 12 4 -3 614.203 259.988 2
 -12 -4 -3 253.149 140.66 1
 -12 -4 -2 3186.26 536.037 1
 12 4 -2 2968.21 549.631 2
 12 4 -1 709.504 273.911 2
 -12 -4 -1 739.308 288.813 1
 12 4 0 831.471 301.003 2
 -12 -4 0 329.517 227.113 1
 12 4 1 977.596 311.787 2
 -12 -4 1 783.533 273.342 1
 -12 -4 2 3025.66 542.866 1
 12 4 2 2418.44 486.367 2
 -12 -4 3 220.969 160.757 1
 12 4 3 235.698 142.699 2
 -12 -4 4 3293.61 587.011 1
 12 4 4 4732.42 677.22 2
 12 4 5 2457.65 501.592 2
 -12 -4 5 1890.03 449.497 1
 12 4 6 1541.34 394.933 2
 -12 -4 6 2785.15 541.961 1
 -12 -4 7 1604.55 452.048 1
 -12 -4 8 1761.54 461.057 1
 -12 -4 9 3752.31 689.235 1
 -12 -4 10 1493.76 487.067 1
 -12 -4 11 2456.34 587.192 1
 -12 -4 12 584.801 303.99 1
 -12 -4 13 4138.75 770.526 1
 12 5 -15 122.895 172.443 2
 12 5 -14 1235.99 428.793 2
 12 5 -13 810.604 376.847 2
 12 5 -12 1314.87 428.766 2
 12 5 -11 2067.14 536.799 2
 12 5 -10 3596.44 682.527 2
 12 5 -9 204.086 96.2558 2
 12 5 -8 1531.9 446.926 2
 12 5 -7 619.915 286.233 2
 -12 -5 -6 261.674 201.189 1
 12 5 -6 329.822 224.851 2
 -12 -5 -5 1125.57 342.599 1
 12 5 -5 762.083 276.717 2
 12 5 -4 3147.35 617.867 2
 -12 -5 -4 3017.73 546.283 1
 12 5 -3 329.448 229.597 2
 -12 -5 -3 -132.442 193.145 1
 12 5 -2 2280.36 512.431 2
 -12 -5 -2 2916.66 563.62 1
 12 5 -1 1088.78 362.992 2
 -12 -5 -1 838.053 301.861 1
 12 5 0 741.204 301.132 2
 -12 -5 0 1305.48 390.927 1
 12 5 1 854.155 305.969 2
 -12 -5 1 1107.12 349.062 1
 -12 -5 2 3045.77 574.993 1
 12 5 2 2510.63 539.028 2
 -12 -5 3 -171.377 198.179 1
 12 5 3 183.91 192.698 2
 -12 -5 4 3086.3 593.56 1
 12 5 4 3659.63 657.752 2
 12 5 5 1098.36 344.993 2
 -12 -5 5 1231.57 390.062 1
 12 5 6 13.8758 106.448 2
 -12 -5 6 -57.8974 190.37 1
 -12 -5 7 465.216 255.584 1
 -12 -5 8 1358.79 409.148 1
 -12 -5 9 395.021 301.949 1
 -12 -5 10 4253.46 768.315 1
 -12 -5 11 2971.68 667.572 1
 -12 -5 12 1076.21 402.081 1
 -12 -5 13 809.869 362.544 1
 -12 -5 14 2596.5 654.302 1
 12 6 -14 558.221 341.743 2
 12 6 -13 305.073 187.92 2
 12 6 -12 2679.57 638.557 2
 12 6 -11 3509.2 695.486 2
 12 6 -10 449.119 244.992 2
 12 6 -9 -208.855 186.84 2
 12 6 -8 770.641 342.157 2
 12 6 -7 107.058 162.996 2
 -12 -6 -6 622.666 279.123 1
 12 6 -6 -67.1601 169.353 2
 -12 -6 -5 1136.62 362.011 1
 12 6 -5 1303.31 399.827 2
 12 6 -4 1566.84 436.162 2
 -12 -6 -4 1096.17 355.904 1
 12 6 -3 411.679 264.332 2
 -12 -6 -3 277.637 236.886 1
 12 6 -2 249.042 208.648 2
 -12 -6 -2 264.247 164.54 1
 12 6 -1 1121.32 355.19 2
 -12 -6 -1 1329.64 389.965 1
 12 6 0 2393.47 542.029 2
 -12 -6 0 2758.99 570.547 1
 12 6 1 916.875 329.105 2
 -12 -6 1 904.933 342.389 1
 -12 -6 2 147.896 161.535 1
 12 6 2 276.704 192.961 2
 -12 -6 3 570.619 273.265 1
 12 6 3 137.654 179.499 2
 12 6 4 973.891 355.992 2
 -12 -6 4 1232.67 391.915 1
 12 6 5 1096.9 390.404 2
 -12 -6 5 1512.31 454.961 1
 12 6 6 446.254 238.517 2
 -12 -6 6 605.683 301.596 1
 -12 -6 7 40.8581 227.25 1
 -12 -6 8 59.8899 130.318 1
 -12 -6 9 44.1354 132.349 1
 -12 -6 10 994.609 406.978 1
 -12 -6 11 4074.28 797.851 1
 -12 -6 12 2466.7 640.952 1
 -12 -6 13 406.161 183.815 1
 -12 -6 14 914.478 349.952 1
 12 7 -12 297.767 236.01 2
 12 7 -11 506.295 282.438 2
 12 7 -10 798.34 363.954 2
 12 7 -9 53.703 178.422 2
 12 7 -8 268.02 213.059 2
 12 7 -7 130.584 183.531 2
 -12 -7 -6 827.82 340.389 1
 12 7 -6 542.108 244.159 2
 12 7 -5 962.235 367.683 2
 -12 -7 -5 1092.31 360.476 1
 12 7 -4 194.23 192.277 2
 -12 -7 -4 38.2874 100.822 1
 12 7 -3 1008.02 385.491 2
 -12 -7 -3 308.898 222.831 1
 12 7 -2 104.902 151.125 2
 -12 -7 -2 -59.5173 103.936 1
 12 7 -1 124.369 149.945 2
 -12 -7 -1 7.32715 161.876 1
 12 7 0 2116.83 548.85 2
 -12 -7 0 1950.25 497.362 1
 12 7 1 222.813 216.517 2
 -12 -7 1 261.136 279.974 1
 -12 -7 2 -171.375 137.51 1
 12 7 2 -131.14 178.246 2
 -12 -7 3 146.669 173.554 1
 12 7 3 269.226 208.32 2
 -12 -7 4 181.068 153.758 1
 12 7 4 196.527 176.988 2
 12 7 5 794.202 382.963 2
 -12 -7 5 1372.74 457.984 1
 12 7 6 762.505 326.168 2
 -12 -7 6 474.854 280.127 1
 12 7 7 -42.7538 102.83 2
 -12 -7 7 181.332 155.114 1
 -12 -7 8 286.72 236.512 1
 -12 -7 9 -486.735 292.348 1
 -12 -7 10 273.655 209.768 1
 -12 -7 11 664.752 340.481 1
 -12 -7 12 573.6 266.652 1
 12 8 -10 188.096 113.607 2
 12 8 -9 1685.06 526.836 2
 12 8 -8 592.841 300.091 2
 12 8 -7 422.781 258.209 2
 -12 -8 -6 561.586 278.198 1
 12 8 -6 583.495 295.322 2
 12 8 -5 1169.85 410.331 2
 -12 -8 -5 1873.74 480.169 1
 12 8 -4 2064.89 600.679 2
 -12 -8 -4 1992.52 491.717 1
 12 8 -3 958.801 375.116 2
 -12 -8 -3 987.206 357.501 1
 12 8 -2 436.912 269.294 2
 -12 -8 -2 469.513 228.783 1
 -12 -8 -1 746.93 315.301 1
 12 8 -1 729.734 339.837 2
 12 8 0 -99.9188 153.57 2
 -12 -8 0 2.44649 211.426 1
 12 8 1 949.86 385.026 2
 -12 -8 1 380.128 187.169 1
 12 8 2 7.34468 180.547 2
 -12 -8 2 1495.14 469.597 1
 -12 -8 3 634.709 286.031 1
 12 8 3 703.759 337.968 2
 -12 -8 4 2462.95 579.982 1
 12 8 4 2070.52 610.171 2
 12 8 5 1988.2 586.912 2
 -12 -8 5 1598.3 499.094 1
 12 8 6 501.933 311.482 2
 -12 -8 6 412.856 327.456 1
 12 8 7 271.36 166.303 2
 -12 -8 7 547.427 375.954 1
 -12 -8 8 700.529 342.318 1
 -12 -8 9 1326 538.969 1
 -12 -8 10 -152.596 164.302 1
 12 9 -6 409.377 229.573 2
 12 9 -5 557.237 327.096 2
 -12 -9 -5 -172.18 200.208 1
 12 9 -4 1631.96 572.184 2
 -12 -9 -4 1395.56 430.948 1
 12 9 -3 790.801 323.407 2
 -12 -9 -3 170.304 173.408 1
 12 9 -2 1283.96 469.346 2
 -12 -9 -2 721.306 354.207 1
 -12 -9 -1 -41.5522 199.551 1
 12 9 -1 75.0264 111.609 2
 12 9 0 -131.011 225.678 2
 -12 -9 0 216.344 186.512 1
 12 9 1 507.586 313.806 2
 -12 -9 1 263.515 252.767 1
 12 9 2 1400.81 497.639 2
 -12 -9 2 1291.38 455.353 1
 -12 -9 3 874.71 361.757 1
 12 9 3 1253.16 442.511 2
 -12 -9 4 2629.05 643.235 1
 12 9 4 2071.51 632.612 2
 -12 -9 5 632.031 315.289 1
 12 9 5 1035.59 461.748 2
 12 9 6 677.56 398.984 2
 -12 -9 6 638.082 350.143 1
 13 0 -16 -65.0367 113.203 2
 13 0 -15 25.2247 146.869 2
 13 0 -14 -79.4932 95.1866 2
 13 0 -13 0.96805 139.293 2
 13 0 -12 4.48446 93.6561 2
 13 0 -11 79.6721 90.3484 2
 13 0 -10 -19.2095 66.6894 2
 13 0 -9 -27.8978 71.6685 2
 13 0 -8 15.6393 54.3702 2
 13 0 -7 153.148 142.968 2
 13 0 -6 -16.4011 61.8337 2
 13 0 -5 -54.811 70.6043 2
 13 0 -4 -2.12185 65.536 2
 -13 0 -2 30.7203 78.0234 1
 -13 0 -1 342.537 224.432 1
 -13 0 0 -95.0376 81.5235 1
 -13 0 1 -128.644 171.572 1
 -13 0 2 34.0794 87.8447 1
 -13 0 3 87.8587 129.655 1
 -13 0 4 12.5236 78.4661 1
 -13 0 5 -36.7416 121.15 1
 -13 0 6 -238.667 169.581 1
 -13 0 7 316.185 260.5 1
 -13 0 8 -103.742 173.437 1
 -13 0 9 -19.7679 137.619 1
 -13 0 10 -7.32098 126.385 1
 -13 0 11 -51.3334 157.6 1
 -13 0 12 -81.7109 109.133 1
 -13 0 13 -99.7952 117.918 1
 -13 0 14 256.333 177.448 1
 -13 0 15 -71.9594 92.9177 1
 13 -1 -16 304.182 215.643 2
 13 1 -16 464.047 258.409 2
 13 -1 -15 90.7036 96.3481 2
 13 1 -15 110.086 130.009 2
 13 -1 -14 495.408 234.89 2
 13 1 -14 454.53 248.496 2
 13 -1 -13 901.252 304.674 2
 13 1 -13 498.595 260.042 2
 13 -1 -12 590.359 249.06 2
 13 1 -12 535.37 247.697 2
 13 1 -11 2540.93 509.036 2
 13 -1 -11 3533.78 563.327 2
 13 -1 -10 35.4185 87.1807 2
 13 1 -10 116.81 103.119 2
 13 -1 -9 142.261 126.655 2
 13 1 -9 218.36 149.305 2
 13 1 -8 2300.31 465.366 2
 13 1 -7 197.514 133.651 2
 13 1 -6 659.238 236.283 2
 13 1 -5 1309.76 312.674 2
 13 1 -4 1067.2 284.293 2
 -13 -1 -3 3744.06 559.96 1
 13 1 -3 2205.51 390.565 2
 -13 -1 -2 3756.21 547.972 1
 13 1 -2 2320.95 398.647 2
 -13 1 -1 1535.4 329.033 1
 -13 -1 -1 2020.22 417.52 1
 13 1 -1 1501.17 312.816 2
 -13 1 0 7826.93 727.72 1
 -13 -1 0 7483.12 786.97 1
 -13 1 1 1620.79 344.032 1
 -13 -1 1 1711.66 382.836 1
 13 1 1 1414.73 302.815 2
 -13 -1 2 4345.25 611.519 1
 -13 1 2 3349.38 491.695 1
 -13 -1 3 3991.18 598.439 1
 -13 1 3 3660.16 510.07 1
 -13 -1 4 2023.54 424.166 1
 -13 1 4 1852.2 368.792 1
 -13 1 5 2610.4 452.588 1
 -13 -1 5 3649.17 576.12 1
 -13 1 6 1255.08 320.7 1
 -13 -1 6 1245.57 358.68 1
 -13 -1 7 799.808 307.225 1
 -13 1 7 290.273 175.897 1
 -13 -1 8 1945.54 433.342 1
 -13 1 8 1996.25 446.687 1
 -13 -1 9 458.006 238.452 1
 -13 1 9 228.968 123.549 1
 -13 -1 10 -78.2354 118.03 1
 -13 1 10 -136.675 143.407 1
 -13 -1 11 3198.7 606.534 1
 -13 1 11 3718.84 616.776 1
 -13 -1 12 684.172 304.181 1
 -13 1 12 708.338 279.13 1
 -13 -1 13 1324.6 412.069 1
 -13 1 13 682.11 278.993 1
 -13 -1 14 766.015 344.329 1
 -13 1 14 1045.99 346.93 1
 -13 -1 15 41.8371 143.665 1
 -13 1 15 332.434 167.466 1
 13 2 -16 235.311 184.113 2
 13 2 -15 649.629 301.227 2
 13 2 -14 1029.63 352.275 2
 13 2 -13 582.169 275.747 2
 13 2 -12 5059.47 764.961 2
 13 2 -11 -39.8357 105.788 2
 13 2 -10 1150.19 368.232 2
 13 2 -9 600.263 271.125 2
 13 2 -8 257.766 136.749 2
 13 2 -7 674.614 260.836 2
 13 2 -6 5369.29 690.649 2
 13 2 -5 680.083 241.549 2
 -13 -2 -4 1576.66 365.796 1
 13 2 -4 811.582 273.456 2
 13 2 -3 1950.84 408.641 2
 -13 -2 -3 2839.63 505.832 1
 13 2 -2 1367.65 340.537 2
 -13 -2 -2 1865.28 401.243 1
 -13 -2 -1 1899.59 434.709 1
 13 2 -1 1237.03 315.439 2
 13 2 0 736.088 259.234 2
 -13 -2 0 1444.4 359.937 1
 13 2 1 1435 340.061 2
 -13 2 1 2020.19 368.559 1
 -13 -2 1 1999.49 444.866 1
 13 2 2 1123.39 301.556 2
 -13 -2 2 1900.12 435.075 1
 -13 2 2 1839.61 344.977 1
 13 2 3 1353.96 315.66 2
 -13 -2 3 2114.82 451.951 1
 -13 2 3 2430.17 395.903 1
 -13 -2 4 1798.53 436.627 1
 13 2 4 883.15 263.451 2
 -13 2 4 1426.65 307.921 1
 13 2 5 370.61 157.968 2
 -13 2 5 861.117 256.569 1
 -13 -2 5 1045.41 324.619 1
 -13 -2 6 8044.82 922.82 1
 -13 2 6 6296.68 666.023 1
 -13 2 7 793.206 251.295 1
 -13 -2 7 886.646 321.66 1
 -13 -2 8 721.662 324.3 1
 -13 2 8 728.097 245.127 1
 -13 -2 9 342.495 219.031 1
 -13 2 9 742.448 253.981 1
 -13 -2 10 1243.2 399.852 1
 -13 2 10 791.938 245.54 1
 -13 -2 11 139.148 173.36 1
 -13 2 11 107.693 141.904 1
 -13 -2 12 5977.56 894.423 1
 -13 2 12 4172.16 619.708 1
 -13 -2 13 796.712 323.38 1
 -13 -2 14 366.442 238.713 1
 -13 -2 15 426.223 341.077 1
 13 3 -15 290.835 200.57 2
 13 3 -14 159.719 196.902 2
 13 3 -13 1043.98 378.267 2
 13 3 -12 1855.69 471.007 2
 13 3 -11 110.976 134.963 2
 13 3 -10 617.969 265.203 2
 13 3 -9 459.685 235.172 2
 13 3 -8 1242.15 355.221 2
 13 3 -7 1944.7 450.944 2
 13 3 -6 965.437 310.632 2
 13 3 -5 1382.35 362.482 2
 -13 -3 -4 707.752 273.469 1
 13 3 -4 878.219 298.832 2
 -13 -3 -3 1861.94 414.108 1
 13 3 -3 1832.32 416.078 2
 -13 -3 -2 2505.74 498.18 1
 13 3 -2 2551.55 490.714 2
 13 3 -1 1920.69 434.459 2
 -13 -3 -1 2038.55 453.293 1
 13 3 0 4565.54 654.655 2
 -13 -3 0 5196.58 718.714 1
 13 3 1 1328.38 353.528 2
 -13 -3 1 2237.43 458.815 1
 -13 3 2 1944.68 327.04 1
 13 3 2 1524.09 363.007 2
 -13 3 3 1489 289.033 1
 -13 -3 3 2163.15 475.558 1
 13 3 3 1195.8 327.081 2
 -13 -3 4 376.329 189.295 1
 13 3 4 480.657 220.263 2
 -13 3 4 304.282 134.169 1
 13 3 5 862.537 294.072 2
 -13 -3 5 1389.95 404.147 1
 -13 3 5 772.715 223.581 1
 13 3 6 742.794 272.305 2
 -13 3 6 621.819 204.483 1
 -13 -3 6 1358.35 392.093 1
 13 3 7 2030.41 448.302 2
 -13 -3 7 2774.18 562.061 1
 13 3 8 1188.95 364.503 2
 -13 -3 8 1482.02 406.349 1
 -13 -3 9 659.975 313.506 1
 -13 -3 10 1207.74 384.813 1
 -13 -3 11 681.742 374.554 1
 -13 -3 12 2417.87 573.616 1
 -13 -3 13 1943.27 560.026 1
 -13 -3 14 64.5547 137.691 1
 -13 -3 15 -294.171 251.076 1
 13 4 -15 295.939 252.093 2
 13 4 -14 765.534 334.361 2
 13 4 -13 605.921 311.038 2
 13 4 -12 1339.85 426.722 2
 13 4 -11 716.689 306.859 2
 13 4 -10 371.09 231.788 2
 13 4 -9 589.917 281.46 2
 13 4 -8 128.09 161.985 2
 13 4 -7 295.879 262.767 2
 13 4 -6 703.356 296.289 2
 -13 -4 -5 406.118 200.197 1
 13 4 -5 255.87 149.455 2
 -13 -4 -4 176.311 105.266 1
 13 4 -4 420.158 231.845 2
 -13 -4 -3 604.657 244.308 1
 13 4 -3 342.973 180.112 2
 13 4 -2 684.722 281.434 2
 -13 -4 -2 543.612 257.75 1
 13 4 -1 428.439 178.354 2
 -13 -4 -1 443.972 268.006 1
 13 4 0 303.287 164.413 2
 -13 -4 0 25.2909 142.59 1
 13 4 1 415.221 207.635 2
 -13 -4 1 513.358 263.602 1
 13 4 2 512.794 218.582 2
 -13 -4 2 1212.04 354.836 1
 -13 -4 3 823.462 308.935 1
 13 4 3 418.476 245.371 2
 -13 -4 4 432.821 228.47 1
 13 4 4 359.391 209.606 2
 13 4 5 -7.06077 93.4028 2
 -13 -4 5 236.954 207.232 1
 13 4 6 552.261 240.71 2
 -13 -4 6 504.3 261.231 1
 13 4 7 399.198 198.044 2
 -13 -4 7 453.355 237.505 1
 -13 -4 8 -118.497 178.705 1
 -13 -4 9 324.61 261.791 1
 -13 -4 10 235.75 223.642 1
 -13 -4 11 459.782 300.254 1
 -13 -4 12 1473.9 476.308 1
 -13 -4 13 1260.12 439.626 1
 -13 -4 14 802.014 372.164 1
 -13 -4 15 754.979 331.75 1
 13 5 -13 8.08229 143.489 2
 13 5 -12 -76.2821 129.291 2
 13 5 -11 256.709 198.2 2
 13 5 -10 689.901 316.379 2
 13 5 -9 253.871 179.325 2
 13 5 -8 409.228 203.013 2
 13 5 -7 413.311 248.317 2
 13 5 -6 166.349 174.954 2
 -13 -5 -5 389.12 230.07 1
 13 5 -5 238.875 202.346 2
 -13 -5 -4 449.514 238.789 1
 13 5 -4 336.803 193.786 2
 13 5 -3 -90.5277 97.0752 2
 -13 -5 -3 91.4028 167.877 1
 13 5 -2 669.21 288.207 2
 -13 -5 -2 811.548 292.841 1
 -13 -5 -1 1085.3 353.999 1
 13 5 -1 384.495 236.183 2
 13 5 0 971.966 328.886 2
 -13 -5 0 993.942 344.685 1
 13 5 1 914.09 343.491 2
 -13 -5 1 62.5471 167.051 1
 13 5 2 624.024 287.985 2
 -13 -5 2 802.487 333.908 1
 -13 -5 3 160.07 155.56 1
 13 5 3 34.7714 156.993 2
 -13 -5 4 329.559 166.288 1
 13 5 4 259.322 198.339 2
 13 5 5 629.321 263.306 2
 -13 -5 5 -191.156 227.076 1
 13 5 6 -47.8241 135.769 2
 -13 -5 6 95.8644 167.814 1
 13 5 7 428.866 226.829 2
 -13 -5 7 329.197 303.242 1
 13 5 8 395.256 223.666 2
 -13 -5 8 451.743 254.871 1
 -13 -5 9 -63.7326 133.695 1
 -13 -5 10 512.321 241.517 1
 -13 -5 11 245.955 214.024 1
 -13 -5 12 -563.674 320.467 1
 -13 -5 13 152.443 195.851 1
 13 6 -12 1555.43 506.272 2
 13 6 -11 29.781 103.028 2
 13 6 -10 809.229 340.174 2
 13 6 -9 -177.14 198.995 2
 13 6 -8 155.153 155.979 2
 13 6 -7 292.29 206.713 2
 13 6 -6 581.496 280.569 2
 -13 -6 -5 453.861 260.824 1
 13 6 -5 639.042 290.415 2
 13 6 -4 1287.74 436.364 2
 -13 -6 -4 1180.24 389.11 1
 13 6 -3 722.216 325.308 2
 -13 -6 -3 867.062 351.531 1
 13 6 -2 236.219 191.899 2
 -13 -6 -2 -44.7845 129.765 1
 -13 -6 -1 1537.55 453.596 1
 13 6 -1 823.284 333.398 2
 13 6 0 3347.06 658.134 2
 -13 -6 0 3236.35 615.579 1
 13 6 1 1762.83 516.106 2
 -13 -6 1 1149.01 391.498 1
 13 6 2 315.618 168.576 2
 -13 -6 2 225.829 172.971 1
 -13 -6 3 1125.23 403.157 1
 13 6 3 2037.36 534.133 2
 -13 -6 4 875.911 379.692 1
 13 6 4 936.475 359.405 2
 13 6 5 588.861 332.435 2
 -13 -6 5 320.801 227.177 1
 13 6 6 735.314 327.551 2
 -13 -6 6 690.368 321.126 1
 13 6 7 32.2592 134.244 2
 -13 -6 7 224.658 129.048 1
 13 6 8 137.409 115.83 2
 -13 -6 8 135.316 208.013 1
 -13 -6 9 -751.763 349.106 1
 -13 -6 10 943.725 403.499 1
 -13 -6 11 -137.971 236.267 1
 -13 -6 12 2048.84 595.675 1
 13 7 -10 397.049 270.916 2
 13 7 -9 254.799 206.631 2
 13 7 -8 248.738 215.157 2
 13 7 -7 356.946 234.921 2
 13 7 -6 1771.85 520.714 2
 -13 -7 -5 447.712 263.868 1
 13 7 -5 702.92 351.3 2
 13 7 -4 601.608 286.935 2
 -13 -7 -4 473.189 247.073 1
 13 7 -3 1835.59 536.352 2
 -13 -7 -3 1866.31 483 1
 13 7 -2 2143.78 583.205 2
 -13 -7 -2 1904.69 488.07 1
 -13 -7 -1 1503.65 451.473 1
 13 7 -1 1512.33 462.447 2
 13 7 0 2320.12 589.418 2
 -13 -7 0 2563.4 585.751 1
 13 7 1 1134.74 426.999 2
 -13 -7 1 1453.7 437.099 1
 13 7 2 2329.5 634.485 2
 -13 -7 2 1470.95 473.156 1
 -13 -7 3 1337.02 425.951 1
 13 7 3 711.589 340.114 2
 -13 -7 4 308.009 208.473 1
 13 7 4 905.804 380.335 2
 -13 -7 5 797.77 397.666 1
 13 7 5 652.79 289.871 2
 13 7 6 1930.22 555.608 2
 -13 -7 6 3318.01 706.191 1
 13 7 7 640.997 303.963 2
 -13 -7 7 514.074 266.068 1
 13 7 8 357.644 262.199 2
 -13 -7 8 276.078 225.783 1
 -13 -7 9 271.183 233.257 1
 -13 -7 10 1069.92 435.617 1
 13 8 -7 1578.28 520.995 2
 13 8 -6 2155.92 594.058 2
 13 8 -5 1198.22 474.333 2
 -13 -8 -5 1613.78 460.99 1
 13 8 -4 602.84 412.186 2
 -13 -8 -4 337.892 268.029 1
 13 8 -3 785.18 367.439 2
 -13 -8 -3 1758.27 480.52 1
 13 8 -2 562.327 329.603 2
 -13 -8 -2 863.494 346.699 1
 13 8 -1 124.212 253.09 2
 -13 -8 -1 268.412 273.593 1
 13 8 0 2936.72 698.652 2
 -13 -8 0 3749.74 717.161 1
 13 8 1 -137.034 177.884 2
 -13 -8 1 114.667 193.188 1
 13 8 2 730.541 353.791 2
 -13 -8 2 509.185 278.558 1
 13 8 3 1060.88 437.087 2
 -13 -8 3 1287.85 488.95 1
 -13 -8 4 478.433 345.711 1
 13 8 4 308.161 305.257 2
 -13 -8 5 1033.45 391.941 1
 13 8 5 1180.71 466.39 2
 13 8 6 3064.23 736.661 2
 -13 -8 6 2120.92 571.711 1
 13 8 7 1780.93 567.921 2
 -13 -8 7 533.672 285.902 1
 14 0 -15 3680.71 671.618 2
 14 0 -14 939.33 343.202 2
 14 0 -13 -107.408 127.322 2
 -14 0 -2 3036.59 507.906 1
 -14 0 -1 3515.84 544.765 1
 -14 0 0 496.732 226.443 1
 -14 0 1 2943.07 504.014 1
 -14 0 2 2949.14 509.611 1
 -14 0 3 321.014 183.155 1
 -14 0 4 -207.938 164.481 1
 -14 0 5 3809.84 594.968 1
 -14 0 6 1275.86 355.525 1
 -14 0 7 3876.49 615.339 1
 -14 0 8 1554.74 413.813 1
 -14 0 9 5400.49 755.211 1
 -14 0 10 2471.93 518.397 1
 -14 0 11 795.255 342.45 1
 -14 0 12 5463.68 825.242 1
 -14 0 13 235.886 219.524 1
 -14 0 14 721.411 275.965 1
 -14 0 15 3237.64 656.501 1
 14 1 -14 121.824 163.612 2
 14 1 -13 456.177 223.268 2
 14 1 -12 222.821 151.827 2
 14 1 -11 556.436 261.122 2
 14 1 -10 1479.42 386.574 2
 14 1 -9 396.043 213.745 2
 14 1 -8 1178.54 349.814 2
 14 1 -7 2211.45 442.435 2
 14 1 -6 142.462 103.308 2
 -14 -1 -3 422.24 228.121 1
 -14 -1 -2 3404.46 558.336 1
 -14 -1 -1 1385.94 350.736 1
 -14 1 0 633.5 239.866 1
 -14 -1 0 315.741 128.348 1
 -14 1 1 1103.24 288.624 1
 -14 -1 1 802.23 301.625 1
 -14 -1 2 2401.65 467.492 1
 -14 1 2 3268.89 505.999 1
 -14 1 3 173.775 130.567 1
 -14 -1 3 367.852 183.736 1
 -14 -1 4 985.434 323.746 1
 -14 1 4 893.279 269.639 1
 -14 -1 5 3642.23 601.999 1
 -14 1 5 3209.26 521.32 1
 -14 -1 6 -27.7923 134.765 1
 -14 1 6 207.593 173.683 1
 -14 1 7 3120.94 539.967 1
 -14 -1 7 3213.37 593.187 1
 -14 -1 8 1331.96 393.695 1
 -14 1 8 1259.9 359.95 1
 -14 -1 9 1112.09 353.829 1
 -14 1 9 1124.48 344.722 1
 -14 -1 10 1647.31 454.906 1
 -14 1 10 1566.29 399.949 1
 -14 -1 11 550.384 242.523 1
 -14 1 11 519.422 233.866 1
 -14 -1 12 81.096 125.324 1
 -14 1 12 650.344 285.446 1
 -14 -1 13 561.925 253.988 1
 -14 1 13 872.465 323.142 1
 -14 -1 14 101.048 174.497 1
 -14 1 14 145.32 151.911 1
 14 2 -14 251.84 212.216 2
 14 2 -13 947.236 374.084 2
 14 2 -12 262.908 197.925 2
 14 2 -11 403.559 241.185 2
 14 2 -10 310.361 187.378 2
 14 2 -9 -19.6821 71.1155 2
 14 2 -8 1281 383.845 2
 14 2 -7 862.633 314.688 2
 14 2 -6 912.371 307.119 2
 14 2 -5 43.8383 84.0414 2
 14 2 -4 831.483 305.263 2
 -14 -2 -3 1440.27 376.675 1
 14 2 -3 939.849 317.414 2
 -14 -2 -2 808.225 287.556 1
 14 2 -2 547.231 203.907 2
 -14 -2 -1 757.44 266.545 1
 14 2 -1 283.593 156.053 2
 -14 -2 0 67.713 131.863 1
 -14 2 1 431.6 175.383 1
 -14 -2 1 392.774 204.028 1
 -14 2 2 847.348 238.536 1
 -14 -2 2 731.691 288.015 1
 -14 -2 3 895.827 322.446 1
 -14 2 3 871.599 249.87 1
 -14 2 4 1004.34 274.528 1
 -14 -2 4 1324.52 399.209 1
 -14 -2 5 464.455 233.429 1
 -14 2 5 252.73 126.427 1
 -14 2 6 987.56 301.861 1
 -14 -2 6 1012.48 327.699 1
 -14 2 7 902.969 289.433 1
 -14 -2 7 876.782 283.583 1
 -14 2 8 714.776 243.197 1
 -14 -2 8 861.075 322.059 1
 -14 -2 9 -6.40623 171.71 1
 -14 -2 10 292.681 240.323 1
 -14 -2 11 631.803 280.552 1
 -14 -2 12 191.422 103.957 1
 -14 -2 13 415.2 195.461 1
 -14 -2 14 359.923 272.548 1
 14 3 -13 -32.3094 145.174 2
 14 3 -12 568.238 281.904 2
 14 3 -11 281.696 183.344 2
 14 3 -10 503.34 280.577 2
 14 3 -9 21.5764 99.6847 2
 14 3 -8 146.069 127.9 2
 14 3 -7 271.494 222.556 2
 14 3 -6 80.8847 105.902 2
 14 3 -5 382.453 210.26 2
 -14 -3 -4 1761.97 443.006 1
 14 3 -4 603.568 256.218 2
 -14 -3 -3 991.693 356.138 1
 14 3 -3 922.514 321.769 2
 -14 -3 -2 945.401 308.158 1
 14 3 -2 867.461 270.259 2
 -14 -3 -1 968.556 338.801 1
 14 3 -1 528.327 236.865 2
 14 3 0 60.9005 134.612 2
 -14 -3 0 -40.2484 115.1 1
 14 3 1 913.334 297.655 2
 -14 -3 1 739.009 278.26 1
 14 3 2 1137.84 335.636 2
 -14 -3 2 1186.25 375.7 1
 14 3 3 800.639 288.293 2
 -14 -3 3 1368.89 412.054 1
 -14 -3 4 1113.33 390.248 1
 -14 -3 5 746.558 331.393 1
 -14 -3 6 383.813 201.771 1
 -14 -3 7 934.96 361.268 1
 -14 -3 8 331.759 232.414 1
 -14 -3 9 -20.0396 181.209 1
 -14 -3 10 181.51 185.688 1
 -14 -3 11 98.7529 143.559 1
 -14 -3 12 900.698 379.636 1
 -14 -3 13 43.7623 185.942 1
 14 4 -12 2559.83 596.995 2
 14 4 -11 -65.1087 115.847 2
 14 4 -10 1815.26 488.854 2
 14 4 -9 2250.63 533.797 2
 14 4 -8 2508.57 557.631 2
 14 4 -7 716.919 277.869 2
 14 4 -6 631.276 274.639 2
 14 4 -5 542.166 286.329 2
 -14 -4 -4 331.426 174.567 1
 14 4 -4 139.773 139.271 2
 -14 -4 -3 182.803 114.871 1
 14 4 -3 195.601 155.701 2
 -14 -4 -2 257.219 207.989 1
 14 4 -2 397.052 203.813 2
 14 4 -1 842.599 306.19 2
 -14 -4 -1 2265.55 501.003 1
 -14 -4 0 35.1481 158.733 1
 14 4 0 151.623 147.473 2
 14 4 1 1626.5 423.986 2
 -14 -4 1 2060.97 499.209 1
 14 4 2 349.408 99.5182 2
 -14 -4 2 -67.3214 151.954 1
 14 4 3 255.495 208.072 2
 -14 -4 3 199.922 147.984 1
 -14 -4 4 321.645 258.143 1
 14 4 4 295.502 193.458 2
 -14 -4 5 555.562 288.519 1
 14 4 5 509.947 238.994 2
 14 4 6 611.941 214.499 2
 -14 -4 6 981.106 398.005 1
 -14 -4 7 530.78 285.204 1
 -14 -4 8 2677.99 617.944 1
 -14 -4 9 3348.07 689.792 1
 -14 -4 10 2026.18 534.338 1
 -14 -4 11 426.32 315.478 1
 -14 -4 12 2734.96 668.831 1
 14 5 -11 45.9044 108.456 2
 14 5 -10 2880.49 641.986 2
 14 5 -9 1776.82 502.181 2
 14 5 -8 2093.72 536.418 2
 14 5 -7 801.337 315.768 2
 14 5 -6 375.167 231.162 2
 -14 -5 -5 1452.28 435.677 1
 14 5 -5 888.214 334.204 2
 -14 -5 -4 830.1 324.887 1
 14 5 -4 851.46 333.43 2
 -14 -5 -3 1825.61 468.376 1
 14 5 -3 1241.31 421.767 2
 14 5 -2 2492.67 554.297 2
 -14 -5 -2 2364.93 538.021 1
 14 5 -1 1955.21 503.991 2
 -14 -5 -1 1123.94 370.603 1
 14 5 0 1284.29 399.515 2
 -14 -5 0 905.347 330.601 1
 14 5 1 1615.04 471.696 2
 -14 -5 1 1208.09 427.028 1
 14 5 2 2112.75 511.913 2
 -14 -5 2 2579.43 568.833 1
 14 5 3 2082.81 539.373 2
 -14 -5 3 1320.41 398.474 1
 -14 -5 4 1426.98 420.41 1
 14 5 4 1262.04 423.493 2
 -14 -5 5 889.116 381.461 1
 14 5 5 888.508 363.914 2
 14 5 6 334.811 125.894 2
 -14 -5 6 310.003 346.306 1
 14 5 7 837.23 354.064 2
 -14 -5 7 524.728 290.072 1
 14 5 8 1594.15 477.148 2
 -14 -5 8 2297.18 592.942 1
 14 5 9 2123.58 535.753 2
 -14 -5 9 2666.18 642.897 1
 -14 -5 10 3628.11 776.853 1
 -14 -5 11 449.667 270.119 1
 14 6 -9 1424.75 474.232 2
 14 6 -8 681.287 320.073 2
 14 6 -7 383.245 252.32 2
 14 6 -6 96.0162 166.123 2
 -14 -6 -5 1000.51 405.757 1
 14 6 -5 1113.07 370.815 2
 -14 -6 -4 177.698 206.576 1
 14 6 -4 205.672 181.741 2
 14 6 -3 2411.41 583.768 2
 -14 -6 -3 2383.31 527.221 1
 14 6 -2 424.193 262.275 2
 -14 -6 -2 -97.3436 104.932 1
 14 6 -1 324.927 185.586 2
 -14 -6 -1 396.884 218.316 1
 14 6 0 2604.59 607.157 2
 -14 -6 0 1909.85 518.616 1
 14 6 1 588.59 269.353 2
 -14 -6 1 683.857 275.163 1
 14 6 2 481.901 274.151 2
 -14 -6 2 132.236 153.381 1
 14 6 3 3034.13 667.253 2
 -14 -6 3 2871.53 617.245 1
 -14 -6 4 109.462 171.642 1
 14 6 4 49.8554 157.327 2
 -14 -6 5 963.5 369.587 1
 14 6 5 1012.65 373.869 2
 14 6 6 332.387 215.399 2
 -14 -6 6 792.308 353.468 1
 14 6 7 219.834 197.206 2
 -14 -6 7 -202.977 267.679 1
 14 6 8 2129.33 576.494 2
 -14 -6 8 2088.91 587.433 1
 14 6 9 1071.11 401.9 2
 -14 -6 9 1821.82 564.811 1
 14 7 -6 335.989 265.415 2
 14 7 -5 180.454 181.537 2
 -14 -7 -5 476.733 255.151 1
 -14 -7 -4 117.486 242.576 1
 14 7 -4 301.464 214.299 2
 14 7 -3 1451.39 478.601 2
 -14 -7 -3 1227.1 410.196 1
 14 7 -2 445.696 305.522 2
 -14 -7 -2 144.028 152.949 1
 14 7 -1 323.695 245.186 2
 -14 -7 -1 492.449 284.821 1
 -14 -7 0 110.901 155.011 1
 14 7 0 240.63 221.209 2
 14 7 1 260.956 235.565 2
 -14 -7 1 177.801 203.962 1
 14 7 2 191.421 125.046 2
 -14 -7 2 377.89 306.292 1
 14 7 3 1480.56 490.797 2
 -14 -7 3 1972.34 527.659 1
 -14 -7 4 950.77 382.124 1
 14 7 4 1155.89 442.957 2
 -14 -7 5 476.286 307.271 1
 14 7 5 83.6739 110.63 2
 -14 -7 6 887.988 437.279 1
 14 7 6 423.906 305.232 2
 -15 0 -1 146.172 128.607 1
 -15 0 0 -146.266 140.008 1
 -15 0 1 89.4574 111.796 1
 -15 0 2 -50.4367 82.4995 1
 -15 0 3 18.5908 83.3764 1
 -15 0 4 284.361 215.589 1
 -15 0 5 326.464 190.823 1
 -15 0 6 -44.7525 93.4554 1
 -15 0 7 -100.443 124.88 1
 -15 0 8 -122.33 174.422 1
 -15 0 9 -158.608 155.79 1
 -15 0 10 -92.0591 130.593 1
 -15 0 11 -10.9917 185.431 1
 -15 0 12 7.70243 89.5785 1
 -15 -1 -2 1598.02 395.04 1
 -15 -1 -1 2094.04 457.663 1
 -15 1 0 1021.12 294.67 1
 -15 -1 0 747.561 270.297 1
 -15 -1 1 2265.31 492.202 1
 -15 1 1 2435.44 450.471 1
 -15 -1 2 1450.19 392.914 1
 -15 1 2 1510.27 360.324 1
 -15 1 3 112.337 95.3978 1
 -15 -1 3 -137.897 181.299 1
 -15 1 4 794.877 278.004 1
 -15 -1 4 496.145 228.765 1
 -15 -1 5 1328.61 393.514 1
 -15 1 5 1133.46 324.81 1
 -15 -1 6 534.007 230.939 1
 -15 1 6 878.792 294.757 1
 -15 -1 7 1368.82 404.521 1
 -15 1 7 1548 387.455 1
 -15 1 8 624.081 264.661 1
 -15 -1 8 937.834 336.962 1
 -15 1 9 253.094 217.773 1
 -15 -1 9 312.298 143.159 1
 -15 -1 10 2447.19 551.642 1
 -15 1 10 2052.62 472.301 1
 -15 -1 11 455.213 260.52 1
 -15 -1 12 119.233 86.4815 1
 15 2 -12 225.717 217.168 2
 15 2 -11 980.231 336.005 2
 -15 -2 -3 710.021 283.552 1
 -15 -2 -2 2260.44 484.049 1
 -15 -2 -1 2381.65 491.833 1
 -15 -2 0 462.334 200.335 1
 -15 -2 1 2331.81 525.892 1
 -15 2 2 1870.72 381.865 1
 -15 -2 2 2533.59 526.869 1
 -15 2 3 175.847 65.9606 1
 -15 -2 3 -96.4721 104.575 1
 -15 -2 4 2149.95 503.436 1
 -15 2 4 1630.8 342.065 1
 -15 -2 5 894.38 342.42 1
 -15 -2 6 237.399 190.85 1
 -15 -2 7 2475.82 565.889 1
 -15 -2 8 2689.27 586.644 1
 -15 -2 9 57.4994 185.478 1
 -15 -2 10 634.815 384.075 1
 -15 -2 11 1276.52 464.845 1
 -15 -2 12 551.389 300.899 1
 15 3 -11 408.013 291.108 2
 15 3 -10 961.523 356.581 2
 15 3 -9 454.143 259.729 2
 15 3 -8 1370.98 412.707 2
 15 3 -7 1742.51 469.359 2
 15 3 -6 1405.26 401.918 2
 15 3 -5 388.072 213.577 2
 15 3 -4 2082.26 483.672 2
 -15 -3 -3 313.942 202.712 1
 -15 -3 -2 2141.7 467.232 1
 -15 -3 -1 984.443 352.265 1
 -15 -3 0 80.5981 166.837 1
 -15 -3 1 934.751 349.287 1
 -15 -3 2 2075.66 506.812 1
 -15 -3 3 345.906 198.673 1
 -15 -3 4 2046.46 492.863 1
 -15 -3 5 370.834 286.152 1
 -15 -3 6 1750.47 484.791 1
 -15 -3 7 1774.53 501.198 1
 -15 -3 8 1427.25 452.344 1
 -15 -3 9 614.936 304.457 1
 -15 -3 10 2026 565.604 1
 -15 -3 11 769.217 368.462 1
 15 4 -10 836.93 335.973 2
 15 4 -9 533.932 292.368 2
 15 4 -8 70.5703 148.94 2
 15 4 -7 341.134 196.995 2
 15 4 -6 269.786 188.285 2
 15 4 -5 130.5 81.4424 2
 15 4 -4 1909.66 481.297 2
 -15 -4 -4 1859 467.816 1
 15 4 -3 842.871 304.781 2
 -15 -4 -3 1111.26 363.101 1
 -15 -4 -2 464.309 265.612 1
 15 4 -2 302.668 178.318 2
 -15 -4 -1 280.103 232.926 1
 15 4 -1 47.797 73.6099 2
 15 4 0 209.403 171.515 2
 -15 -4 0 224.269 244.932 1
 -15 -4 1 224.754 191.384 1
 -15 -4 2 514.622 285.963 1
 -15 -4 3 1246.92 419.179 1
 -15 -4 4 1969.41 525.794 1
 -15 -4 5 211.313 187.751 1
 -15 -4 6 513.982 296.989 1
 -15 -4 7 620.58 305.251 1
 -15 -4 8 -132.075 250.615 1
 -15 -4 9 1151.69 397.119 1
 -15 -4 10 1370.56 478.385 1
 15 5 -8 157.395 154.355 2
 15 5 -7 642.579 311.931 2
 15 5 -6 322.911 259.797 2
 15 5 -5 56.691 87.6837 2
 15 5 -4 425.259 233.743 2
 -15 -5 -4 520.778 271.724 1
 -15 -5 -3 955.611 359.308 1
 15 5 -3 983.228 372.428 2
 -15 -5 -2 -128.451 220.33 1
 15 5 -2 228.011 194.078 2
 15 5 -1 979.491 371.78 2
 -15 -5 -1 711.515 353.334 1
 15 5 0 660.998 307.935 2
 -15 -5 0 77.0048 152.846 1
 15 5 1 1018.55 359.948 2
 -15 -5 1 980.265 377.253 1
 15 5 2 85.1272 81.8386 2
 -15 -5 2 371.59 266.122 1
 15 5 3 472.382 244.28 2
 -15 -5 3 675.458 283.047 1
 -15 -5 4 876.598 371.268 1
 -15 -5 5 65.7966 120.158 1
 -15 -5 6 121.056 207.781 1
 -15 -5 7 659.104 303.137 1
 -15 -5 8 722.806 318.273 1
 15 6 -5 1345.22 445.078 2
 -15 -6 -4 820.82 331.459 1
 15 6 -4 1455.6 476.567 2
 -15 -6 -3 208.94 223.624 1
 15 6 -3 -185.618 226.409 2
 15 6 -2 1203.12 412.448 2
 -15 -6 -2 1290.38 453.048 1
 15 6 -1 1020.61 407.233 2
 -15 -6 -1 1272.19 413.638 1
 15 6 0 2.10135 164.073 2
 -15 -6 0 225.456 290.368 1
 15 6 1 637.961 297.439 2
 -15 -6 1 735.854 344.343 1
 15 6 2 721.451 345.227 2
 -15 -6 2 1178.15 385.205 1
 15 6 3 -130.997 126.899 2
 -15 -6 3 52.8309 184.425 1
 15 6 4 686.112 294.567 2
 -15 -6 4 996.631 389.79 1
 -15 -6 5 1794.18 527.932 1
 15 6 5 1398.92 461.775 2
 -16 0 0 2464.32 489.687 1
 -16 0 1 1253.35 345.08 1
 -16 0 2 1887.01 453.125 1
 -16 0 3 861.468 305.547 1
 -16 0 4 2696.97 532.358 1
 -16 0 5 34.0791 152.171 1
 -16 0 6 4156.55 677.12 1
 -16 0 7 -44.6539 140.928 1
 -16 0 8 3537.38 642.344 1
 -16 0 9 691.355 302.086 1
 -16 -1 -1 423.445 233.166 1
 -16 -1 0 2800.75 533.119 1
 -16 -1 1 595.878 256.824 1
 -16 1 1 597.756 262.389 1
 -16 -1 2 1165.3 360.158 1
 -16 1 2 1336.05 352.833 1
 -16 -1 3 1764.77 460.531 1
 -16 1 3 793.272 272.542 1
 -16 1 4 1129.04 315.267 1
 -16 -1 4 1444.1 403.948 1
 -16 1 5 145.374 178.545 1
 -16 -1 5 31.4317 94.2932 1
 -16 -1 6 3693.23 670.811 1
 -16 1 6 2706.74 528.246 1
 -16 -1 7 800.427 272.737 1
 -16 -1 8 206.73 102.514 1
 -16 -1 9 280.736 236.61 1
 -16 -2 -2 411.521 220.298 1
 -16 -2 -1 540.453 272.793 1
 -16 -2 0 518.776 220.558 1
 -16 -2 1 130.346 157.294 1
 -16 -2 2 -45.9055 204.435 1
 -16 -2 3 -41.7287 132.969 1
 -16 -2 4 643.216 286.522 1
 -16 -2 5 320.342 259.637 1
 -16 -2 6 391.325 230.878 1
 -16 -2 7 146.138 197.032 1
 -16 -2 8 410.122 261.411 1
 -16 -2 9 152.552 116.393 1
 -16 -3 -3 1261.85 430.29 1
 -16 -3 -2 -196.668 201.148 1
 -16 -3 -1 856.393 323.592 1
 -16 -3 0 -223.894 186.221 1
 -16 -3 1 1715.79 476.374 1
 -16 -3 2 80.2519 136.516 1
 -16 -3 3 976.207 349.382 1
 -16 -3 4 154.203 140.727 1
 -16 -3 5 1014.88 405.439 1
 -16 -3 6 205.951 208.609 1
 -16 -3 7 710.965 323.275 1
 -16 -4 -3 1841.55 460.987 1
 -16 -4 -2 15.645 98.9972 1
 -16 -4 -1 778.996 302.7 1
 -16 -4 0 -19.4292 116.336 1
 -16 -4 1 454.924 273.064 1
 -16 -4 2 437.689 260.858 1
 -16 -4 3 1061.3 385.327 1
 -16 -4 4 593.138 306.45 1
 -16 -4 5 439.66 255.084 1
 -16 -4 6 460.292 299.428 1
 -16 -5 -2 -21.7704 113.273 1
 -16 -5 -1 1491.23 430.774 1
 -16 -5 0 898.949 378.002 1
 -16 -5 1 1226.28 427.338 1
 -16 -5 2 58.2482 189.633 1
 -17 0 0 -19.1112 107.451 1
 -17 0 1 6.00679 70.3973 1
 -17 0 2 -128.912 132.084 1
 -17 0 3 -24.2859 86.5652 1
 -17 0 4 -82.1733 121.375 1
 -17 -1 -1 600.737 272.517 1
 -17 -1 0 480.934 231.753 1
 -17 -1 1 257.172 220.604 1
 -17 -1 2 466.791 259.054 1
 -17 -1 3 151.046 131.566 1
 -17 -1 4 -5.80814 158.011 1
 -17 -2 -1 -69.4421 105.77 1
 -17 -2 0 129.33 171.246 1
 -17 -2 1 13.5281 118.073 1
 -17 -2 2 969.336 346.641 1
 -17 -2 3 675.817 309.479 1

_iucr_refine_instructions_details
;

    ortho_new.res created by SHELXL-2014/7

TITL ortho_new in Pca2(1)
CELL 0.71073 13.3456 10.2748 19.6583 90 90 90
ZERR 4 0.0008 0.0007 0.0017 0 0 0
LATT -1
SYMM -X,-Y,0.5+Z
SYMM 0.5-X,+Y,0.5+Z
SYMM 0.5+X,-Y,+Z
SFAC C H N O S
UNIT 112 128 8 24 8
 
L.S. 20
PLAN  15
fmap 2
acta
MERG 2
REM <olex2.extras>
REM <HklSrc "%.\\ortho_new.hkl">
REM </olex2.extras>
 
WGHT    0.068000
FVAR       2.42239
S2    5    0.661929    0.899848    0.213946    11.00000    0.02458    0.02958 =
         0.02079   -0.00241    0.00174   -0.00397
S1    5    0.711856    1.103208    0.380494    11.00000    0.02367    0.03883 =
         0.02905   -0.01173    0.00276   -0.00802
O3    4    0.667098    1.026243    0.184141    11.00000    0.03984    0.03116 =
         0.02793   -0.00138    0.00449   -0.01139
O6    4    0.442728    0.624919    0.338064    11.00000    0.02740    0.02801 =
         0.03445   -0.00243   -0.00177   -0.00506
O4    4    0.750096    0.845460    0.243600    11.00000    0.02206    0.04533 =
         0.03106   -0.00664    0.00232    0.00160
O1    4    0.720642    1.205543    0.331323    11.00000    0.04895    0.04847 =
         0.03287   -0.00714    0.01005   -0.02760
N2    3    0.573593    0.894731    0.272265    11.00000    0.01922    0.03384 =
         0.01544   -0.00291    0.00267   -0.00058
O2    4    0.789062    1.005909    0.384479    11.00000    0.02362    0.05980 =
         0.05041   -0.03243   -0.00394    0.00057
N1    3    0.605636    1.024245    0.373741    11.00000    0.02276    0.02679 =
         0.02589   -0.00344    0.00101   -0.00391
O5    4    0.609618    0.613110    0.339869    11.00000    0.03344    0.04130 =
         0.04109   -0.00978    0.00508    0.00306
C19   1    0.530218    0.805404    0.383848    11.00000    0.02230    0.02856 =
         0.01990   -0.00074    0.00273    0.00145
AFIX  13
H19   2    0.462428    0.840662    0.378597    11.00000   -1.20000
AFIX   0
C17   1    0.615022    0.660529    0.165707    11.00000    0.04244    0.03205 =
         0.02050   -0.00042    0.00679   -0.00648
AFIX  43
H17   2    0.632193    0.630056    0.208701    11.00000   -1.20000
AFIX   0
C25   1    0.643477    0.748923    0.480457    11.00000    0.04136    0.03303 =
         0.02754    0.00086    0.00063    0.00063
AFIX  43
H25   2    0.691869    0.724358    0.448930    11.00000   -1.20000
AFIX   0
C10   1    0.482567    0.972218    0.256236    11.00000    0.02622    0.03719 =
         0.02024    0.00159   -0.00351    0.00273
AFIX  23
H10A  2    0.424080    0.929171    0.274998    11.00000   -1.20000
H10B  2    0.474243    0.977316    0.207290    11.00000   -1.20000
AFIX   0
C11   1    0.617471    0.792603    0.151165    11.00000    0.02422    0.02507 =
         0.02473   -0.00031    0.00404   -0.00198
C9    1    0.490393    1.108272    0.285337    11.00000    0.02019    0.03089 =
         0.03014    0.00175   -0.00092    0.00343
AFIX  23
H9A   2    0.427277    1.153418    0.278859    11.00000   -1.20000
H9B   2    0.541945    1.156139    0.261172    11.00000   -1.20000
AFIX   0
C18   1    0.603962    0.893543    0.343942    11.00000    0.02407    0.02567 =
         0.01932   -0.00192   -0.00079   -0.00136
AFIX  13
H18   2    0.671324    0.856086    0.347206    11.00000   -1.20000
AFIX   0
C13   1    0.566345    0.750763    0.037149    11.00000    0.04535    0.04523 =
         0.02216   -0.00741   -0.00829    0.00981
AFIX  43
H13   2    0.550665    0.782184   -0.005921    11.00000   -1.20000
AFIX   0
C4    1    0.711485    1.310223    0.466908    11.00000    0.03776    0.02920 =
         0.03127   -0.00730   -0.00120   -0.00435
AFIX  43
H4    2    0.720263    1.362262    0.428662    11.00000   -1.20000
AFIX   0
C7    1    0.684572    1.153387    0.580879    11.00000    0.03265    0.04188 =
         0.02584   -0.00090   -0.00630    0.00179
AFIX  43
H7    2    0.675365    1.101197    0.619022    11.00000   -1.20000
AFIX   0
C14   1    0.562812    0.618136    0.049308    11.00000    0.02738    0.03451 =
         0.02872   -0.00753    0.00032    0.00075
C27   1    0.438677    0.495870    0.306488    11.00000    0.04100    0.03269 =
         0.03543    0.00040   -0.00510   -0.01174
AFIX  23
H27A  2    0.485364    0.437172    0.328600    11.00000   -1.20000
H27B  2    0.455829    0.501408    0.258626    11.00000   -1.20000
AFIX   0
C12   1    0.592812    0.837448    0.087987    11.00000    0.03780    0.02447 =
         0.03541   -0.00819   -0.00382    0.00446
AFIX  43
H12   2    0.593792    0.926333    0.079080    11.00000   -1.20000
AFIX   0
C3    1    0.708693    1.364369    0.532201    11.00000    0.03693    0.03062 =
         0.03743   -0.01176   -0.00256   -0.00501
AFIX  43
H3    2    0.715855    1.453866    0.537329    11.00000   -1.20000
AFIX   0
C8    1    0.515651    1.104768    0.360655    11.00000    0.02415    0.03109 =
         0.02639   -0.00573   -0.00273    0.00005
AFIX  23
H8A   2    0.527466    1.192685    0.376744    11.00000   -1.20000
H8B   2    0.459261    1.069435    0.385718    11.00000   -1.20000
AFIX   0
C5    1    0.700744    1.176558    0.461098    11.00000    0.02189    0.02901 =
         0.03454   -0.00536   -0.00281   -0.00276
C26   1    0.533295    0.670752    0.351527    11.00000    0.02756    0.02707 =
         0.01509   -0.00132   -0.00029    0.00048
C2    1    0.695608    1.288139    0.588794    11.00000    0.02216    0.04422 =
         0.03045   -0.01081   -0.00404    0.00475
C21   1    0.480956    0.830721    0.506232    11.00000    0.03556    0.02773 =
         0.02888   -0.00103   -0.00668   -0.00005
AFIX  43
H21   2    0.419478    0.862339    0.491295    11.00000   -1.20000
AFIX   0
C6    1    0.687188    1.097547    0.517534    11.00000    0.03017    0.03568 =
         0.03016   -0.00541   -0.00576    0.00060
AFIX  43
H6    2    0.679978    1.008035    0.512509    11.00000   -1.20000
AFIX   0
C16   1    0.586269    0.574486    0.114487    11.00000    0.04473    0.02936 =
         0.03084   -0.00184    0.00794   -0.00977
AFIX  43
H16   2    0.582662    0.485959    0.124034    11.00000   -1.20000
AFIX   0
C15   1    0.536327    0.522190   -0.004812    11.00000    0.04095    0.04368 =
         0.03353   -0.01697   -0.00221   -0.00412
AFIX 137
H15A  2    0.596536    0.488270   -0.024805    11.00000   -1.50000
H15B  2    0.496982    0.564410   -0.039227    11.00000   -1.50000
H15C  2    0.498431    0.452192    0.014795    11.00000   -1.50000
AFIX   0
C24   1    0.662225    0.737329    0.550552    11.00000    0.03661    0.03486 =
         0.04261   -0.00420   -0.01168    0.00002
AFIX  43
H24   2    0.723933    0.707283    0.565931    11.00000   -1.20000
AFIX   0
C22   1    0.499518    0.817961    0.575709    11.00000    0.04457    0.03572 =
         0.03710   -0.00906    0.00514    0.00205
AFIX  43
H22   2    0.451114    0.841685    0.607403    11.00000   -1.20000
AFIX   0
C23   1    0.588588    0.770772    0.596143    11.00000    0.04084    0.03769 =
         0.03061   -0.00476   -0.00839   -0.00408
AFIX  43
H23   2    0.600652    0.760501    0.642427    11.00000   -1.20000
AFIX   0
C1    1    0.692846    1.346297    0.659342    11.00000    0.05157    0.05407 =
         0.03626   -0.02036   -0.00902    0.00283
AFIX 137
H1A   2    0.700770    1.438983    0.656341    11.00000   -1.50000
H1B   2    0.746259    1.310372    0.686126    11.00000   -1.50000
H1C   2    0.629755    1.326496    0.680393    11.00000   -1.50000
AFIX   0
C20   1    0.553863    0.796418    0.459415    11.00000    0.02850    0.02489 =
         0.03050   -0.00522   -0.00198   -0.00315
C28   1    0.333482    0.448237    0.315006    11.00000    0.04330    0.04362 =
         0.05064   -0.00804   -0.00158   -0.01310
AFIX 137
H28A  2    0.287598    0.513957    0.299690    11.00000   -1.50000
H28B  2    0.321188    0.429683    0.362134    11.00000   -1.50000
H28C  2    0.324163    0.370507    0.288658    11.00000   -1.50000
AFIX   0
HKLF 4
 
REM  ortho_new in Pca2(1)
REM R1 =  0.0639 for    3521 Fo > 4sig(Fo)  and  0.0846 for all    4583 data
REM    346 parameters refined using      1 restraints
 
END  
     
WGHT      0.0680      0.0000 

REM Highest difference peak  0.395,  deepest hole -0.436,  1-sigma level  0.071
Q1    1   0.5600  0.4565  0.3014  11.00000  0.05    0.39
Q2    1   0.7112  0.8441  0.2153  11.00000  0.05    0.35
Q3    1   0.7539  1.0317  0.3914  11.00000  0.05    0.31
Q4    1   0.5577  0.7951  0.5091  11.00000  0.05    0.30
Q5    1   0.5853  1.2375  0.2780  11.00000  0.05    0.30
Q6    1   0.6055  0.8220  0.4588  11.00000  0.05    0.28
Q7    1   0.7151  0.9544  0.2087  11.00000  0.05    0.28
Q8    1   0.6967  0.7827  0.4416  11.00000  0.05    0.28
Q9    1   0.6590  1.0385  0.3827  11.00000  0.05    0.27
Q10   1   0.4934  0.3981 -0.0282  11.00000  0.05    0.27
Q11   1   0.7020  1.0947  0.6165  11.00000  0.05    0.26
Q12   1   0.5745  0.5849 -0.0217  11.00000  0.05    0.25
Q13   1   0.6793  1.5066  0.5217  11.00000  0.05    0.25
Q14   1   0.6406  1.0080  0.2283  11.00000  0.05    0.25
Q15   1   0.4823  1.0037  0.4816  11.00000  0.05    0.25

  REM The information below was added by Olex2.
  REM
  REM R1 = 0.0639 for 3521 Fo > 4sig(Fo) and 0.0846 for all 8720 data
  REM n/a parameters refined using n/a restraints
  REM Highest difference peak 0.39, deepest hole -0.44
  REM Mean Shift 0, Max Shift 0.000.

  REM +++ Tabular Listing of Refinement Information +++
  REM R1_all = 0.0846
  REM R1_gt = 0.0639
  REM wR_ref = 0.1580
  REM GOOF = 1.044
  REM Shift_max = 0.000
  REM Shift_mean = 0
  REM Reflections_all = 8720
  REM Reflections_gt = 3521
  REM Parameters = n/a
  REM Hole = -0.44
  REM Peak = 0.39
  REM Flack = 0.13(11)

  
;
_olex2_submission_special_instructions 'No special instructions were received'
_oxdiff_exptl_absorpt_empirical_details
;
Empirical correction (ABSPACK) includes:
- Absorption correction using spherical harmonics
- Frame scaling
- Detector area scaling
;
_oxdiff_exptl_absorpt_empirical_full_max 1.287
_oxdiff_exptl_absorpt_empirical_full_min 0.835
